1 **Persistence of a novel regeneration-associated transitional cell state in**  
2 **pulmonary fibrosis**

3 Yoshihiko Kobayashi<sup>1,#</sup>, Aleksandra Tata<sup>1,#</sup>, Arvind Konkimalla<sup>1,2</sup>, Hiroaki Katsura<sup>1</sup>,  
4 Rebecca, F. Lee<sup>1</sup>, Jianhong Ou<sup>1</sup>, Nicholas E. Banovich<sup>3</sup>, Jonathan A. Kropski<sup>4,5,6</sup> and  
5 Purushothama Rao Tata<sup>1,7,8,\*</sup>.

6

7 1 Department of Cell Biology, Duke University School of Medicine, Durham, NC 27710,  
8 USA

9 2 Medical Scientist Training Program, Duke University School of Medicine, Durham, NC  
10 27710, USA

11 3 Translational Genomics Research Institute, Phoenix, AZ 85004, USA

12 4 Division of Allergy, Pulmonary and Critical Care Medicine, Department of Medicine,  
13 Vanderbilt University Medical Center, Nashville, TN 37212, USA

14 5 Department of Veterans Affairs Medical Center, Nashville, TN 37212, USA

15 6 Department of Cell and Developmental Biology, Vanderbilt University, Nashville, TN  
16 37212, USA

17 7 Duke Cancer Institute, Duke University School of Medicine, Durham, NC 27710, USA

18 8 Regeneration Next, Duke University, Durham, NC 27710, USA

19 # Denotes co-first author

20 \* Corresponding author: Purushothama Rao Tata, [purushothamarao.tata@duke.edu](mailto:purushothamarao.tata@duke.edu)

21

22

23

24 **Abstract**

25 Stem cell senescence is often seen as an age associated pathological state in which cells  
26 acquire an abnormal and irreversible state. Here, we show that alveolar stem cell  
27 differentiation during lung regeneration involves a unique previously uncharacterized  
28 transitional state that exhibits cardinal features normally associated with cell senescence.  
29 Specifically, using organoid cultures, multiple *in vivo* injury models coupled with single  
30 cell transcriptomics and lineage tracing analysis, we find that alveolar stem cell  
31 differentiation involves a novel, pre-alveolar type-1 transitional state (PATS) en route to  
32 their terminal maturation. PATS can be distinguished based on their unique transcriptional  
33 signatures, including enrichment for TP53, TGF $\beta$ , and DNA damage repair signaling, and  
34 cellular senescence in both *in vivo* and *ex vivo* regenerating tissues. Significantly, PATS  
35 undergo extensive cell stretching, which makes them vulnerable to DNA damage, a  
36 feature commonly associated with most degenerative lung diseases. Importantly, we find  
37 enrichment of PATS-like state in human fibrotic lung tissues, suggesting that persistence  
38 of such transitional states underlies the pathogenesis of pulmonary fibrosis. Our study  
39 thus redefines senescence as a state that can occur as part of a normal tissue  
40 maintenance program, and can be derailed in human disease, notably fibrosis.

41

42

43

44

45

46

## 47 **Introduction**

48 Adult stem cells undergo dynamic changes in phenotype in response to tissue damage  
49 <sup>1,2</sup>. These changes include resurgence from a quiescent or poised state, onset of  
50 proliferation, activation of new programs of gene expression and a return to homeostasis  
51 <sup>3-8</sup>. In many cases, repair also involves changes in epithelial cell shape, for example  
52 through transient stretching and expansion to cover areas of damage or denudation, or  
53 more permanent changes in cell phenotype. Studies of stem cells during regeneration  
54 usually focus on understanding how cells select new differentiation programs in response  
55 to signals from the niche. However, much less is known about the significance of changes  
56 in parameters such as cell shape and spreading and whether they involve the transient  
57 and tightly controlled expression of genes usually associated with pathologic states such  
58 as DNA repair and senescence. Here, we explore this question in relation to epithelial  
59 repair in the distal gas-exchange alveolar region of the mammalian lung.

60 In the lung, the maintenance of the alveolar epithelium at homeostasis and its  
61 regeneration after injury are fueled by surfactant-producing, cuboidal, type-2 alveolar  
62 epithelial cell (AEC2), which can self-renew and differentiate into very large, thin, type-1  
63 alveolar epithelial cells (AEC1), specialized for gas exchange <sup>1,2,9-17</sup>. Recent studies have  
64 identified a subset of AEC2s that are enriched for active Wnt signaling and have higher  
65 “stemness” compared to Wnt-inactive AEC2s. Such differences in alveolar progenitor cell  
66 subsets have been attributed to differences in microenvironmental signals <sup>9,12,18</sup>; in this  
67 case, to the vicinity of PDGFR $\alpha$ -expressing alveolar fibroblasts which produce ligands to  
68 activate Wnt signaling in AEC2s. Recent studies have also implicated other intercellular  
69 signaling pathways, including BMP, Notch, TGF $\beta$ , YAP, and NF- $\kappa$ B, in the proliferation

70 and differentiation of AEC2s, both at steady state and in response to alveolar injury<sup>15,19–</sup>  
71 <sup>21</sup>. However, the precise mechanisms by which the cuboidal AEC2s orchestrate their  
72 dramatic changes in cell shape, structure and mechanical properties as they convert into  
73 thin, flat AEC1s, remain elusive. In addition, the cellular mechanisms that drive AEC2s to  
74 express genes associated with cell senescence, a feature commonly observed in most  
75 progressive pulmonary diseases, remain unknown.

76 Here, using organoid cultures and single-cell transcriptome studies, we uncovered  
77 novel, distinct cell states encompassing the transition between AEC2s and AEC1.  
78 Moreover, murine lineage tracing, coupled with injury repair models, have revealed the  
79 existence of similar transition states *in vivo*. Our study reveals signaling pathways that  
80 control these transition states. We also discovered that these novel transitional states  
81 exhibit DNA damage responses, and express senescence-related genes en route to  
82 AEC1. Importantly, these transitional states correlate with abnormal epithelial cells that  
83 are associated with defective fibrotic foci in lungs of human patients with progressive  
84 pulmonary fibrosis.

85

## 86 **Results**

### 87 **Single-cell transcriptomics revealed novel alveolar epithelial cell states in *ex vivo*** 88 **organoids.**

89 Recent studies have shown that in response to lung injury, AEC2s proliferate and give  
90 rise to AEC1s<sup>11</sup>. Moreover, in alveolar organoid culture AEC2s spontaneously generate  
91 AEC1s<sup>10</sup>. However, the molecular mechanisms and transitional cell states underlying the  
92 differentiation of AEC2 into AEC1 is still poorly understood. To understand the

93 mechanisms associated with AEC2 differentiation to AEC1, we performed single-cell  
94 transcriptome analysis on cells isolated from alveolar organoids. Purified AEC2 were  
95 mixed with fibroblasts and cultured for 10 days to grow organoids for scRNA-seq analysis  
96 (Fig. 1a). Uniform Manifold Approximation and Projection (UMAP) identified two major  
97 clusters consisting of *Epcam*<sup>+</sup> epithelial cells and *Vim*<sup>+</sup>/*Pdgfra*<sup>+</sup> fibroblasts  
98 (Supplementary Fig. 1a,b). Next, we further deconvoluted and visualized epithelial cell  
99 populations. Within the epithelial cells, we observed multiple sub-clusters: cells  
100 expressing high levels of *Sftpc*, a marker for AEC2s, cells expressing high levels of *Ager*  
101 (*Rage*), a marker for AEC1s, and *Sftpc*<sup>+</sup>/*Mki67*<sup>+</sup> proliferating AEC2s (Fig. 1b). These data  
102 indicate that under these culture conditions, purified lineage labeled AEC2s proliferate  
103 and spontaneously generate AEC1s. In addition, we identified a novel population of  
104 alveolar epithelial cells expressing *Cldn4*, *Krt19*, and *Sfn* (Fig. 1b,c). The marker genes  
105 unique to this cluster showed two distinct patterns when visualized in UMAP and volcano  
106 plots (Fig. 1 c,d). One subset (*Ctgf*<sup>+</sup> cells) is enriched for *Ctgf*, *Clu*, *Sox4* and *Actn1* while  
107 the other (*Lgals3*<sup>+</sup> cells) is enriched for *Lgals3*, *Csro1*, *S100a14*, and *Cldn18* (Fig. 1 c,d).  
108 Additional transcripts that are enriched in the *Lgals3*<sup>+</sup> sub-cluster include *Ager*, *Emp2*,  
109 and *Hopx*, markers of AEC1, suggesting resemblances and a potential lineage hierarchy  
110 between *Lgals3*<sup>+</sup> cells and AEC1 (Fig. 1c,d). These data suggest that the newly identified  
111 *Cldn4*/*Krt19*/*Sfn*<sup>+</sup> population is an intermediate between AEC2 and AEC1. We therefore  
112 termed this population “pre-alveolar type-1 transitional cell state” (in short, PATS). To  
113 validate our single cell data, we performed immunofluorescence analysis for PATS  
114 markers on alveolar organoids (Fig. 1e). Immunostaining analysis confirmed the presence  
115 of cells expressing PATS-specific markers, including CLDN4, LGALS3, and SOX4 in

116 alveolospheres (Fig. 1f). Taken together, these data identified unique and novel cell  
117 states during alveolar epithelial stem cell differentiation in organoid cultures.

118

### 119 **PATS emerge *in vivo* after alveolar injury**

120 We then asked whether PATS can be observed *in vivo* in homeostatic and regenerating  
121 alveolar tissues. To test this, first we analyzed a publicly available scRNA-seq data set  
122 from alveolar epithelial cells isolated from mice exposed to lipopolysaccharide (LPS), a  
123 bacterial endotoxin that causes lung injury<sup>22</sup>. We rendered scRNA-seq data from LPS  
124 and control lungs in UMAP plots and found a population that is unique to LPS treated  
125 lungs but is not in controls. Significantly, this population is enriched for genes expressed  
126 in PATS, including *Cldn4*, *Sox4*, *Lgals3*, and *Fn1* (Supplementary Fig. 2). To further  
127 characterize PATS, we utilized *Ctgf-GFP* mice, a fluorescence reporter transgenic mouse  
128 line in which green fluorescent protein is driven by the promoter for *Ctgf*, a gene highly  
129 enriched in PATS<sup>23</sup>. We then exposed these mice to bleomycin, a drug that damages the  
130 alveolar region causing transient fibrosis. We collected lungs on day 12 post injury for  
131 analysis (Fig. 2a). Immunofluorescence analysis for GFP expression in control, uninjured,  
132 *Ctgf-GFP* mice revealed GFP signal specifically in alveolar fibroblasts and not in alveolar  
133 epithelial cells (Fig. 2b,c and Supplementary Fig. 3). By contrast, in bleomycin injured  
134 lungs, we found GFP expression in a significant number of epithelial cells co-labeled by  
135 the expression of the AEC2 marker, SFTPC (Fig. 2b,c and Supplementary Fig. 3). These  
136 data corroborate our organoid scRNA-seq data and suggest that PATS arise from AEC2s  
137 after alveolar injury. Next, we performed co-immunofluorescence analysis for other PATS  
138 markers including CLDN4, LGALS3 and SFN. Our analysis revealed that *Ctgf-GFP*

139 expression in epithelial cells overlaps with that of other PATS markers in bleomycin-  
140 injured mice but not in control lungs (Fig. 2 b,c). Interestingly, we noticed that many cells  
141 that are positive for *Ctgf*-GFP and other PATS markers show an elongated cell shape as  
142 compared to cuboidal AEC2, suggesting that they are en route to differentiation into AEC1  
143 (Fig. 2b,c). Flow cytometric analysis further revealed a significant number of *Ctgf*-GFP<sup>+</sup>  
144 cells and LGALS3<sup>+</sup> cells in bleomycin treated lungs compared to controls (Fig. 2d). A  
145 recent study found elevated levels of KRT8 expression in alveolar epithelial cells after  
146 bleomycin-induced injury<sup>24</sup>. Therefore, we tested the expression of KRT8 in alveoli after  
147 bleomycin-induced lung injury. We found a significant increase in overlap between KRT8  
148 and *Ctgf*-GFP-expressing cells (Supplementary Fig. 3). Taken together, our data reveal  
149 that cells with a PATS phenotype emerge in alveoli after bleomycin injury *in vivo*.

150 We then asked whether PATS cells are specific to bleomycin injury or appear in  
151 other injury models. To test this we employed *AGER-CreER;R26R-DTR* mice in which  
152 administration of tamoxifen activates the expression of diphtheria toxin receptor in AGER-  
153 Expressing AEC1 cells. This receptor then binds to exogenously administered diphtheria  
154 toxin resulting in selective ablation of AEC1 cells (Fig. 2a). We collected lung samples at  
155 day 6 after DT injection and performed immunostaining analysis for PATS markers (Fig.  
156 2e). Interestingly, we found cells expressing CLDN4 and LGALS3 that appear to show  
157 elongated morphology in AEC1 ablated lungs but not in controls (Fig. 2f and  
158 Supplementary Fig. 4). Further quantification revealed a significant number of LGALS3<sup>+</sup>  
159 cells after AEC1 ablation ( $1.647 \pm 0.1041$  after ablation vs  $0.274 \pm 0.02086$  in control) (Fig.  
160 2g). These data suggest that emergence of PATS can be a general mechanism in alveolar  
161 regeneration.

162

### 163 **Lineage tracing revealed PATS cells originate from AEC2**

164 Our above data from *ex vivo* organoid cultures and *in vivo* injury models suggested that  
165 PATS cells originate from AEC2s (Fig. 1). To empirically test this hypothesis, we used a  
166 *Sftpc-creER;R26R-tdTomato* mouse model, in which tamoxifen administration  
167 permanently induces the expression of tdTomato fluorescent protein specifically in AEC2  
168 and their descendants (Fig. 2h)<sup>25</sup>. On day-10 post bleomycin administration, we observed  
169 lineage labeled (tdTomato<sup>+</sup>) cells co-expressing LGALS3 (Fig. 2i), SFN (Fig. 2j) and  
170 CLDN4 (Fig. 2k), and high levels of KRT8 (Supplementary Fig. 5) in damaged regions of  
171 the alveoli. Of note, LGALS3, SFN and CLDN4 expression was not observed in  
172 tdTomato<sup>+</sup> cells in the control lungs (Fig. 2i-k). Interestingly, some lineage labeled SFN<sup>+</sup>  
173 and CLDN4<sup>+</sup> cells showed flat, thin, and elongated morphology and co-expressed AGER,  
174 implying that they are in transition to AEC1. Taken together, our data provide evidence  
175 that PATS cells emerge *in vivo* from AEC2s after alveolar injury and generate AEC1 (Fig.  
176 2).

177

### 178 **Lineage tracing analysis revealed PATS cells generate AEC1**

179 Multiple lines of data from our above experiments suggest that PATS are en route to  
180 AEC1 (Fig. 1 and Fig. 2). To test this possibility, we first used an algorithm tool called  
181 Velocity<sup>26</sup>, which allows the prediction of cell differentiation trajectories based on ratios  
182 between spliced and unspliced mRNA. Using this algorithm, we observed that strong RNA  
183 velocities (trajectory) originating from the newly identified *Ctgf*<sup>+</sup> population to AEC1  
184 through the *Lgals3*<sup>+</sup> population (Fig. 3a-c). These data further strengthened our above



185 findings that PATS cells are intermediate between AEC2 and AEC1. We then used *Krt19-*  
186 *CreEr* an allele of a gene specifically expressed in PATS, in combination with *R26R-*  
187 *tdTomato* (in short, *Krt19-tdTomato*) to carry out lineage tracing in the bleomycin lung  
188 injury model to test whether the same trajectory occurs in regenerating alveoli *in vivo*.  
189 First, mice were exposed to bleomycin to induce alveolar injury, then tamoxifen was  
190 subsequently administered on day 7 after the exposure to label *Krt19*-expressing cells  
191 and their progeny by tdTomato (Fig. 3d). In control lungs, we observed a small number  
192 of tdTomato labeled cells co-expressing AGER<sup>+</sup> (1.39%±0.31%) and LGALS3<sup>hi</sup>  
193 macrophages (Fig. 3g and Supplementary Fig. 6a,c). However, we did not find any  
194 labeling in AEC2 cells (0%±0) (Supplementary Fig. 6a,c). In contrast, we observed a  
195 significant number of tdTomato<sup>+</sup> cells co-expressing low levels of SFTPC in damaged  
196 regions in bleomycin injured lungs (47.22%±6.81%) (Supplementary Fig. 6 a-c). Of note,  
197 we did not find tdTomato<sup>+</sup> cells co-expressing SFTPC in uninjured regions from the same  
198 lungs, indicating that *Krt19* expression is specifically activated in response to injury in the  
199 damaged regions. These data also indicate that the *Krt19-tdTomato* mouse line and the  
200 conditions we tested here are well suited for labeling and tracing PATS. Furthermore, co-  
201 immunofluorescence analysis revealed lineage labeled cells co-expressed PATS  
202 markers in bleomycin treated lungs but not in control lungs (Fig. 3e-g and Supplementary  
203 Fig. 6). Specifically, we observed SFN expression in tdTomato<sup>+</sup> cells that appear cuboidal  
204 (white arrows) as well as in elongated cells (yellow arrowheads) (Fig. 3e-g, right). By  
205 contrast, CLDN4 and LGALS3 expression was present mostly in elongating cells (yellow  
206 arrowhead and white arrow, respectively)) (Fig. 3e-g right). Importantly, on day-12 post  
207 bleomycin administration, we found numerous *Krt19-tdTomato*<sup>+</sup> cells co-expressing

208 AGER, a marker for AEC1 (Fig. 3e,f and Supplementary Fig. 6). Thus, our combined RNA  
209 velocity and lineage tracing analysis reveal that the newly identified PATS traverse  
210 between AEC2 and AEC1.

211

## 212 **Conserved Transcriptional programs and pathways in PATS**

213 Differentiation of AEC2 to AEC1 is associated with a dramatic change in the shape and  
214 structure of the cells, from a cuboidal to flat and thin morphology. Such a transition is  
215 typically accompanied by many changes in the expression of signaling and structural  
216 proteins<sup>27,28</sup>. We therefore hypothesized that these changes occur in PATS. To test our  
217 hypothesis, we analyzed our scRNA-seq data from *ex vivo* organoid cultures and *in vivo*  
218 alveolar injury models (LPS-induced lung injury), focusing on genes that were commonly  
219 enriched in both datasets. We found numerous genes that are conserved among PATS  
220 (Fig. 4a). Pathway enrichment analysis revealed activation of TP53, TNF/NF- $\kappa$ B, ErbB,  
221 HIF1, cell cycle arrest, cytoskeletal dynamics, tight junction signaling and TGF $\beta$  signaling  
222 in PATS cells compared to other populations (Fig. 4 b,c). Previous studies have  
223 implicated all these pathways in alveolar regeneration following injury, highlighting the  
224 importance of these pathways in PATS<sup>20,22,29-31</sup>. Unexpectedly, we also found significant  
225 enrichment for genes representative of senescence and DNA damage response  
226 pathways (Fig. 4).

227

228 **PATS cells naturally exhibit DNA damage and senescence during alveolar**  
229 **regeneration *in vivo***

230 Our above data indicated that DNA damage and senescence associated genes are highly  
231 enriched in PATS. To validate these findings, we assayed lung tissue sections from  
232 bleomycin or PBS treated mice for *β-galactosidase* activity, that serves as a biomarker  
233 for senescent cells, as well as  $\gamma$ H2AX, a marker for DNA damage signaling. Interestingly,  
234 we detected numerous *β-galactosidase* active cells, as assessed based on X-gal derived  
235 blue color deposition, in *Sftpc*-tdt lineage derived cells in bleomycin injured alveoli but not  
236 in control alveoli (Fig. 5a,b). Similarly, we also observed accumulation of  $\gamma$ H2AX puncta  
237 in the nuclei of elongated *Sftpc*-tdt<sup>+</sup> cells (Fig. 5c,d). Moreover, quantification revealed  
238 that 15.09%±1.52% *Sftpc*-tdt<sup>+</sup> cells expressed  $\gamma$ H2AX in bleomycin injured lungs  
239 compared to 0.84%±0.25% in controls (Fig. 5d). Furthermore, we found that  $\gamma$ H2AX<sup>+</sup> cells  
240 also co-expressed LGALS3, indicating that PATS undergo DNA damage during alveolar  
241 regeneration.

242 Bleomycin is known to induce DNA damage in cells. However, both our scRNA-  
243 seq analysis and immunostaining revealed a strong enrichment for DNA damage repair  
244 signaling in PATS but not in other cell types. To avoid any potential effects from bleomycin  
245 on DNA damage, we performed  $\gamma$ H2AX staining on lungs from the AEC1-specific cell  
246 ablation model. In this model, 37.37%±6.197 LGALS3<sup>+</sup> cells showed  $\gamma$ H2AX<sup>+</sup> nuclear  
247 speckles in AEC1 cells compared to 0%±0% in control lungs (Fig. 5e-h). Of note,  $\gamma$ H2AX<sup>+</sup>  
248 cells were not observed in experimental lungs after recovery of AEC1 cells, suggesting  
249 that the DNA damage observed in PATS cells is transient and repaired as the cells  
250 progress to AEC1 (data not shown).

251

252 **PATS cells are vulnerable to mechanical stretch-induced DNA damage**

253 Previous studies have shown that ionizing radiation, oxidative stress, and the mechanical  
254 stretching that occurs during cell migration and cell stretching can all cause DNA  
255 damage<sup>32,33</sup>. Interestingly, we observed an enrichment for genes involved in cytoskeletal  
256 changes but not oxidative stress in our pathway analysis. Since, AEC2 differentiation into  
257 AEC1 requires extensive cell stretching and cytoskeletal dynamics (Fig. 4) we  
258 hypothesized that PATS cells experience significant mechanical stretching that can lead  
259 to DNA damage. To test this hypothesis, we purified AEC2s from *SFTPC-GFP* mice and  
260 cultured them on a plastic surface (2D cultures), conditions under which AEC2s stretch  
261 and differentiate into AEC1s<sup>34</sup>. Within 5 days after plating, most AEC2s stretched and  
262 either lost (GFP<sup>-</sup>) or downregulated (GFP<sup>lo</sup>) GFP expression. These GFP<sup>-</sup> and GFP<sup>lo</sup> cells  
263 increased their surface area through stretching and spreading and began to express  
264 AGER, a marker for AEC1. Interestingly, these AGER<sup>+</sup> cells are also positive for the DNA  
265 damage marker,  $\gamma$ H2AX (Fig. 5i,k). Of note, we did not see cell stretching and DNA  
266 damage markers in cells that we collected on day-2 after plating (Fig. 5k). Taken together,  
267 our data show that cuboidal AEC2s that differentiate into large and thin AEC1 during  
268 alveolar regeneration naturally experience DNA damage and repair and undergo transient  
269 senescence.

270

## 271 **Ectopic activation of TP53 signaling promotes AEC2 to AEC1 differentiation via** 272 **PATS during alveolar injury-repair**

273 Our data suggest that activation of TP53 signaling is associated with PATS during AEC2  
274 differentiation into AEC1 after lung injury (Fig. 4). Furthermore, previous studies in other  
275 tissues have suggested that TP53 signaling promotes differentiation and suppresses

276 stem cell self-renewal<sup>35</sup>. This led us to hypothesize that enhanced activation of TP53  
277 signaling increases AEC2 differentiation into AEC1 involving PATS after bleomycin-  
278 induced lung injury. To test this hypothesis, we utilized the *Sftpc-CreER;R26-tdTomato*  
279 mouse model, in which tamoxifen administration is followed by bleomycin or PBS. These  
280 mice were then administered Nutlin-3a (an activator of the TP53 pathway) or DMSO  
281 (control) daily starting on day-8 after bleomycin and tissues were collected on day-18 (Fig.  
282 6a). Immunostaining analysis for the AEC1 cell marker, AGER, revealed that Nutlin-3a  
283 treatment led to significantly greater differentiation of lineage labelled AEC2 cells into  
284 AEC1 compared to DMSO controls (Fig. 6b). We did not observe any AGER<sup>+</sup>*Sftpc-tdt*<sup>+</sup>  
285 cells in uninjured lungs that received Nutlin-3a, suggesting that in the absence of injury,  
286 Nutlin3a-induced TP53 activation alone is not sufficient to induce AEC2 differentiation  
287 into AEC1 (Fig. 6b). Our quantitative analysis revealed that 67.25%±1.94% AGER<sup>+</sup> cells  
288 are *Sftpc-tdt*<sup>+</sup> after bleomycin injury and Nutlin-3a treatment compare to 54.55%±3.71%  
289 in bleomycin and DMSO treated animals. Additionally, we also tested the effect of Nutlin-  
290 3a on AEC2s in alveolar organoid cultures. Organoid cultures were treated with Nutlin-3a  
291 or DMSO starting on day-7 until harvest on day 15 (Fig. 6d). Immunostaining analysis  
292 revealed that organoids treated with Nutlin-3a showed both an increase in the number  
293 and the expression intensity of AGER<sup>+</sup> cells and a decrease in the number of proliferating  
294 cells as demonstrated by Ki67 immunostaining compare to controls (Fig. 6d,e). These  
295 data further support our hypothesis that TP53 signaling enhances AEC2 differentiation  
296 both *in vivo* regenerating tissues and *ex vivo* organoid cultures.

297

298 **Transcriptional control of PATS by transcription factor TP53**

299 To identify the transcription factor modules that are potentially active in PATS, we  
300 performed chromatin immunoprecipitation analysis for Histone H3 lysine 4 tri-methylation  
301 (H3K4me3), Histone H3 lysine 36 tri-methylation (H3K36me3), and Histone H3 lysine 27  
302 acetylation (H3K27ac), to identify active promoters, transcribing genes, and enhancers,  
303 respectively. We isolated and sorted PATS from *Ctgf-GFP* mice after bleomycin  
304 administration and AEC2s from control mice. Sorted cells were used for profiling the  
305 above-mentioned histone marks using Mint-ChIP, a recently described method that  
306 requires fewer cell numbers (Fig. 6f) <sup>36</sup>. As expected, we found H3K4me3 enrichment in  
307 genes corresponding to cell type specific promoters (for example, *Sftpc* in AEC2s and  
308 *Fn1* in PATS) (Supplementary Fig. 7a,b). Further analysis revealed enrichment of  
309 numerous H3K4me3 peaks overlapping with transcriptional start sites (TSS) and  
310 promoters of transcripts specific to PATS from bleomycin exposed lungs compared to  
311 AEC2s from controls (Fig. 6g-h). Motif analysis was performed to predict enrichment of  
312 binding sites for transcription factors (TFs) in H3K4me3 and H3K27ac peaks. We found  
313 enrichment of binding sites for TFs including TP53, ETS1, NF1, ATF3, and SOX4, all of  
314 which have been implicated in PATS enriched pathways such as cell cycle arrest,  
315 senescence, DNA damage repair, and cytoskeletal control (Fig. 6g,h) <sup>37-40</sup>. For example,  
316 we found predicted binding sites for TP53 in the *Mdm2* enhancer and *Fas* promoter, two  
317 well-known direct targets of TP53 (Fig. 6i,j) <sup>41</sup>. Similarly, we found predicted binding sites  
318 for NF1, ETS1, and ATF3 in the promoter regions of PATS specific genes including *Lgals3*  
319 *and Sox4* (Supplementary Fig. 7c,d). Taken together, our data implicate a direct role for  
320 TP53 in transcriptional control of PATS-specific genes.

321

322 **PATS associated gene expression signatures and signaling pathways are enriched**  
323 **in human fibrotic lungs**

324 Numerous studies have suggested that abnormal ECM remodeling and chronic  
325 inflammation and stress pathways are associated with defective regeneration in multiple  
326 organs, including the lung <sup>42–45</sup>. Indeed, recent studies have suggested that alveolar  
327 epithelial cells that line fibrotic foci in idiopathic pulmonary fibrosis (IPF) show features of  
328 senescence, growth arrest, and differentiation blockade <sup>46–48</sup>. Thus, we hypothesized that  
329 in response to a non-permissive pathologic microenvironment, alveolar progenitors stall  
330 their differentiation process in a PATS-like state. To address this hypothesis, first we  
331 analyzed a recently reported scRNA-seq dataset from human IPF lungs <sup>49</sup>. First, we  
332 segregated alveolar epithelial cells by excluding all non-epithelial cells and airway cells  
333 from further analysis. We observed numerous AEC2s and AEC1s in both healthy and IPF  
334 lungs, with apparent overlap in UMAP plots (Fig. 7a-c). By contrast, we found a distinct  
335 cell cluster that is highly enriched in IPF samples and did not overlap with either AEC1 or  
336 AEC2 (Fig. 7a,b). Previously, these cells were annotated by their marker gene expression  
337 as *KRT5*/*KRT17*<sup>+49</sup>. Significantly, differential gene expression analysis revealed a striking  
338 resemblance of transcripts, including *Sfn*, *Sox4* and *Fn1*, between the IPF-enriched cell  
339 cluster and PATS from our *ex vivo* organoids and LPS-induced murine lung injury model  
340 *in vivo* (Fig. 1, Fig. 4, Fig. 7a-e, and Supplementary Fig. 8a,b). We therefore named this  
341 human IPF-specific cluster as ‘PATS-like’ cells (Fig. 7a-c). Other transcripts that are  
342 highly enriched in the PATS-like population are *KRT17*, *CALD1*, *PRSS2*, *MMP7*, and  
343 *S100A2*. Gene ontology and pathway analysis revealed an enrichment for components  
344 of p53 signaling (*CDKN1A*, *CDKN2A*, and *MDM2*), DNA-damage checkpoint (*RPS27L*

345 and *PLK3*) and cellular senescence (*TGFB2* and *HIPK2*) (Fig. 7d-f and Supplementary  
346 Fig. 8). Moreover, the PATS-like cluster is enriched for components of focal adhesion,  
347 tight junction, and regulation of actin cytoskeleton, indicating a remarkable resemblance  
348 between PATS-like cells in IPF and those in organoids and regenerating alveoli *in vivo*  
349 (Fig. 4 and Supplementary Fig. 8c). We also found a significant enrichment for *AREG*,  
350 *TGFB1*, *TGFB2* and *TIMP1*, known regulators of fibrosis, in PATS-like cells (Fig. 7f). To  
351 validate single cell transcriptome data, we performed immunofluorescence analysis on  
352 human lung sections from healthy and IPF samples (Supplementary Fig. 9a). Co-  
353 immunofluorescence analysis for markers of PATS-like cells (SFN, CLDN4, LGALS3 and  
354 KRT17), AEC2 (HTII-280), AEC1 (AGER) and myofibroblasts (ACTA2) revealed the  
355 expression of PATS-like markers specifically in IPF lungs but not in healthy controls and  
356 healthy appearing regions in IPF lungs (Fig. 7g-i and Supplementary Fig. 9). Interestingly,  
357 KRT17 has been recently shown to be expressed in basal cells of the normal lung and  
358 basaloid-like cells in pulmonary fibrotic lungs<sup>49,50</sup>. In addition, we also found similar  
359 expression pattern of TP63, another marker for basal cells (Supplementary Fig. 9). We  
360 find that markers of PATS-like cells are almost exclusively present in fibrotic regions as  
361 assessed based on high levels of ECM deposition and accumulation of myofibroblasts  
362 (Fig. 7g-i and Supplementary Fig. 9). Quantitative analysis for SFN<sup>+</sup> cells in total HTII-  
363 280<sup>+</sup> cells further supported these findings (91.07%±3% in IPF samples vs 4.16% ±1.02%  
364 in healthy human) (Fig. 7h). Moreover, we observed that SFN<sup>+</sup>, HTII-280<sup>+</sup> cells lost their  
365 cuboidal shape and acquired an elongated morphology in IPF lungs as opposed to  
366 cuboidal AEC2 or extremely thin and elongated AEC1 in healthy lungs (Fig. 7g,i and  
367 Supplementary Fig. 9b,c). Of note, AGER expression is absent in PATS-like cells in IPF



368 lungs (Fig. 7i). Next, we analyzed markers of cell senescence ( $\beta$ -galactosidase activity  
369 and CDKN1A/p21) and DNA damage response ( $\gamma$ H2AX) in IPF and healthy lungs. Our  
370 data revealed specific expression of these markers in the PATS-like population in IPF but  
371 not in healthy lungs (Fig. 7 j,k and Supplementary Fig. 9 d,e). Taken together, our analysis  
372 revealed similarities between PATS from regenerating tissues and PATS-like cells that  
373 are specific to pathological fibrotic lungs.

374

## 375 **Discussion**

376 The work reported here has uncovered a previously unknown transitional state (PATS)  
377 that traverses between AEC2 and AEC1 and has a specific gene expression signature in  
378 both *ex vivo* organoid cultures and *in vivo* regenerating tissues. These findings further  
379 highlight the resemblance between *ex vivo* organoid models and their *in vivo* correlates.  
380 Our fate mapping studies using *Sftpc*-driven and *Krt19*-driven CreER alleles demonstrate  
381 a clear linear lineage relationship between AEC2 to PATS to AEC1. Therefore, with the  
382 addition of this novel transitional cell state, our study revises the alveolar epithelial cell  
383 hierarchy. Based on distinct gene expression signatures, our study indicates that PATS  
384 cells are not merely undergoing a gradual loss of AEC2 characteristics but represent a  
385 unique transitional population. These cells are identified by their expression of many  
386 pathways, including, TP53, NF- $\kappa$ B, YAP, TGF $\beta$ , and HIF1, previously shown to be  
387 important for lung regeneration<sup>20,22,30,51,52</sup>. In addition, we observed enrichment for  
388 transcripts associated with cell cycle arrest, senescence TP53 and TGF $\beta$  signaling, and  
389 the transcription factor SOX4, a known regulator of epithelial-mesenchymal transition and  
390 cell adhesion in other tissues<sup>53–55</sup>. These transcriptional signatures are consistent with

391 the dramatic morphological changes that occur during AEC2 to AEC1 differentiation.  
392 Through pharmacological modulation, our data demonstrate that TP53 signaling  
393 promotes AEC2 differentiation into AEC1 involving PATS in both *ex vivo* organoid cultures  
394 and *in vivo* regenerating tissues. Our analysis of human lungs identified PATS-like cells  
395 that are specifically present in alveoli of lungs with pulmonary fibrosis. Similar to murine  
396 cells, PATS-like cells in human lungs are also characterized by enrichment for genes  
397 associated with cellular senescence and TP53 signaling, as well as TGF $\beta$  regulated  
398 genes, all of which have been implicated in the pathogenesis of fibrosis multiple organs,  
399 including the lung <sup>56,57</sup>. In contrast, we also found some differences in gene expression  
400 signatures between murine PATS and human IPF-specific PATS-like cells. Some of them  
401 include, TP63, KRT17, and COL1A1, which are found only in human PATS-like cells.  
402 Interestingly, these genes are characteristic markers of basal cells of the normal airway.  
403 Our RNA velocity projections from human scRNA-seq data suggest that these  
404 KRT17<sup>+</sup>/TP63<sup>+</sup> cells originate from AEC2. Indeed, our immunofluorescence studies for  
405 KRT17 and TP63 further suggested that these cells are surrounded by cells that express  
406 markers of PATS within the same alveoli. All together, these data suggest that  
407 KRT17<sup>+</sup>/TP63<sup>+</sup> cells originate from AEC2.

408 Another significant finding from this study is that PATS cells undergo extensive  
409 stretching and spreading, which makes them vulnerable to DNA damage, a feature  
410 commonly associated with most degenerative lung diseases, notably pulmonary fibrosis  
411 and cancers <sup>58–62</sup>. Of note, we did not find cells with DNA damage in AEC1 of lungs that  
412 had fully regenerated following bleomycin-induced injury, suggesting that alveolar cells  
413 can efficiently repair the damage DNA (data not shown). However, it is also possible that

414 tissue may eliminate such “unfit cells” (with DNA damage) through cell extrusion or cell  
415 death mechanisms. Nevertheless, our study uncovered a novel transitional cell state that  
416 is vulnerable to DNA damage during AEC2 differentiation into AEC1. Previous studies  
417 have revealed that cell stretching causes DNA damage when they migrate or squeeze  
418 through narrow spaces<sup>63</sup>. Indeed, our *in vivo* AEC1 ablation and *ex vivo* 2D culture  
419 models suggest similar mechanisms are at play when cuboidal AEC2 undergo extensive  
420 stretching during their differentiation into thin and large AEC1. Therefore, the novel  
421 transitional cell state has clinical implications as most degenerative lung diseases are  
422 accompanied by the presence of cells with DNA damage accumulation<sup>59,60</sup>. Interestingly,  
423 the PATS population is enriched for SOX4, a transcription factor known to regulate  
424 cytoskeletal genes, which is induced following DNA damage and has a crucial role in  
425 TP53 stabilization and function<sup>40</sup>. Altogether, these data support a model in which, cells  
426 evolved co-transcriptional programs to combat DNA damage that can occur when cells  
427 undergo extreme stretching. In addition, genome-wide association studies have identified  
428 mutations in DNA damage repair pathways components, such as *XRCC* family genes,  
429 *LIG4*, *TERC*, *PARP*, and *RTEL1* with emphysema and pulmonary fibrosis<sup>58,64</sup>. Thus, the  
430 novel transitional state we have identified here implicates cell shape changes and  
431 associated vulnerabilities accompanying alveolar stem cell differentiation in the  
432 pathogenesis of some lung diseases (Fig. 8).

433 Senescence is often seen as an age-associated pathological state in which cells acquire  
434 an abnormal and irreversible state<sup>48,62,65,66</sup>. Here, we find that alveolar stem cell  
435 differentiation involves a novel transitional state which exhibits cardinal features of  
436 senescence in normal tissue regeneration. Indeed, prior studies have found senescent

437 cells in embryos in developing limb bud tissues<sup>67</sup>. Therefore, we propose that senescence  
438 may not necessarily occur exclusively in aged tissues but can be a reversible transient  
439 state accompanying tissue repair or regeneration. Our study thus redefines senescence  
440 as a state that can occur as part of normal tissue maintenance programs and can be  
441 derailed in human diseases.

442 In conclusion, using alveolar organoid cultures and *in vivo* injury-repair models, we  
443 have identified a novel pre-AEC1 transitional state in lung regeneration. This novel and  
444 unique state is associated with cellular senescence and enrichment for pathways known  
445 to be associated with defective alveolar regeneration. These results strongly suggest that  
446 prolonged senescence and stress mediated pathways in transitional cell states can lead  
447 to diseases such as fibrosis.

448

## 449 **Online Methods**

450

### 451 **Mice**

452 *Sftpc*<sup>tm1(cre/ERT2)Blh</sup> (*Sftpc-CreER*)<sup>25</sup>, *Krt19*<sup>tm1(cre/ERT)Ggu/J</sup> (*Krt19-CreER*)<sup>68</sup>, *Rosa26R-CAG-*  
453 *Isl-tdTomato*<sup>69</sup> (crossed with *Sftpc-CreER*), *B6.Cg-Gt(ROSA)26Sor*<sup>tm14(CAG-tdTomato)Hze/J</sup>  
454 (*R26R-tdTomato*)<sup>70</sup> (crossed with *Krt19-CreER*), *Tg(SFTPC-GFP)#Heat* (*Sftpc-GFP*)<sup>71</sup>,  
455 *B6.Cg-Ager*<sup>tm2.1(cre/ERT2)Blh/J</sup> (*Ager-CreER*)<sup>72</sup>, *C57BL/6-Gt(ROSA)26Sor*<sup>tm1(HBEGF)Awai/J</sup>  
456 (*R26R-DTR*)<sup>73</sup>, *Mki67*<sup>tm1.1Cle/J</sup> (*Mki67RFP*)<sup>74</sup> and *Tg(Ctgf-EGFP)FX156Gsat* (*Ctgf-GFP*)  
457 <sup>23</sup> were utilized for experiments. For lineage tracing with *Sftpc-CreER;R26R-tdTomato*,  
458 0.2 mg/g body weight Tamoxifen (Tmx, Sigma-Aldrich) was given via oral gavage or  
459 intraperitoneal injection. For lineage tracing using *Krt19-CreER;R26R-tdTomato*, one

460 dose of 0.1 mg/g body weight tamoxifen was given via intraperitoneal injection seven  
461 days after bleomycin injury or PBS administration. Animal experiments were approved  
462 by the Duke University Institutional Animal Care and Use Committee.

463

#### 464 **Bleomycin injury**

465 For bleomycin-induced lung injury, 2.5 U/Kg bleomycin was administered intranasally at  
466 two weeks after tamoxifen injection and mice were monitored daily. PBS administered  
467 mice served as controls. Mice were sacrificed at different time points after bleomycin  
468 injury.

469

#### 470 **Diphtheria toxin (DT) administration**

471 Two weeks before DT administration, *Ager-CreER;R26R-DTR* received tamoxifen via IP  
472 injection. One dose of 3 µg diphtheria toxin (Millipore #322326) was administered via  
473 intraperitoneal injection and mice were sacrificed six days later for tissue collection and  
474 analysis.

475

#### 476 **Mouse lung dissociation and fluorescence assisted cell sorting**

477 Lung dissociation and FACS were performed as described previously<sup>19</sup>. Briefly, lungs  
478 were intratracheally inflated with 1 ml of enzyme solution (Dispase (5 U/ml, Corning  
479 #354235), DNase I (0.33 U/ml) and collagenase type I (450 U/ml, Gibco #17100-017)) in  
480 DMEM/F12. Separated lung lobes were diced and incubated with 3 ml enzyme solution  
481 for 25 min at 37°C with rotation. The reaction was quenched with an equal amount of  
482 medium containing 10% Fetal bovine serum (FBS) and filtered through a 100 µm strainer.

483 The cell pellet was resuspended in red blood cell lysis buffer (155 mM NH<sub>4</sub>Cl, 12 mM  
484 NaHCO<sub>3</sub>, 0.1 mM EDTA) and incubated for 2 min, then filtered through a 40 µm strainer.  
485 The cell pellet was resuspended in DMEM/F12 + 2% BSA and stained with following  
486 antibodies: EpCAM (eBioscience, G8.8), PDGFRα (BioLegend, APA5) and LysoTracker  
487 (Thermo Fisher, L7526) as described previously<sup>29</sup>. Sorting was performed using a BD  
488 FACS Vantage SE, SONY SH800S or Beckman Coulter MoFlo Astrios EQ.

489

### 490 **Alveolar organoid culture**

491 Alveolar organoid culture was performed as described previously<sup>10</sup>. Briefly, lineage  
492 labeled AEC2s (1-3 × 10<sup>3</sup>) from *SFTPC-GFP* or *Sftpc-CreER;R26R-IsI-tdTomato* mice  
493 treated with Tmx were FACS-sorted and PDGFRα<sup>+</sup> (5 × 10<sup>4</sup>) fibroblasts were  
494 resuspended in MTEC/Plus and mixed with equal amount of growth factor-reduced  
495 Matrigel (Corning #354230). Medium was changed every other day.

496

### 497 **Nutlin-3a treatment**

498 For *in vivo* studies, *Sftpc-CreER;R26R-tdTomato* were injected with one dose of  
499 tamoxifen and rested for two weeks followed by bleomycin or PBS administration. Eight  
500 days after injury, Nutlin-3a (Selleckchem #S8059) or DMSO (control) was administered  
501 by intraperitoneal injection at concentration of 20mg/Kg/day for ten consecutive days and  
502 samples were collected on 20 days after bleomycin administration. For *Ex vivo* study,  
503 alveolar organoids were grown for seven days followed by Nutlin-3a (2 µM) treatment for  
504 8 days before their harvest.

505

## 506 **Droplet-based single-cell RNA sequencing (Drop-seq)**

507 Organoids embedded in Matrigel were incubated with *Accutase* solution (sigma #A6964)  
508 at 37°C for 20 min followed by incubation with 0.25% Trypsin-EDTA at 37°C for 10 min.  
509 Trypsin was inactivated using DMEM/F-12 Ham supplemented with 10% FBS and cells  
510 were then resuspended in PBS supplemented with 0.01% BSA. After filtration through 40  
511 µm strainer, cells at a concentration of 100 cells/µl were run through microfluidic channels  
512 at 3,000 µl/h, together with mRNA capture beads at 3,000 µl/h and droplet-generation oil  
513 at 13,000 µl/h. DNA polymerase for pre-amplification step (1 cycle of 95°C for 3 min, 15-  
514 17 cycles of 98°C for 15 sec, 65°C for 30 sec, 68°C for 4 min and 1 cycle of 72°C for 10  
515 min) was replaced by Terra PCR Direct Polymerase (#639271, Takara). The other  
516 processes were performed as described in the original Drop-seq protocol <sup>75</sup>. Libraries  
517 were sequenced using HiSeq X with 150-bp paired end sequencing.

518

## 519 **Computational analysis for scRNA-seq**

520 scRNA-seq analysis of alveolar organoids was performed by processing FASTQ files  
521 using dropSeqPipe v0.3 (<https://hoohm.github.io/dropSeqPipe>) and mapped on the  
522 GRCm38 genome reference with annotation version 91. Unique molecular identifier  
523 (UMI) counts were then further analyzed using an R package Seurat v3.1.1 <sup>76</sup>. UMI count  
524 matrix of murine lungs treated with LPS (GSE130148) <sup>22</sup> was obtained from Gene  
525 Expression Omnibus (GEO). UMI counts were normalized using SCTransform. Cell  
526 barcodes for the clusters of interests were extracted and utilized for *velocity run*  
527 command in *velocity.py* v0.17.15 <sup>77</sup> as well as generating RNA velocity plots using  
528 *velocity.R* v0.6 in combination with an R package SeuratWrappers v0.1.0

529 (<https://github.com/satijalab/seurat-wrappers>). Twenty-five nearest neighbors in slope  
530 calculation smoothing was used for *RunVelocity* command. After excluding duplets,  
531 specific cell clusters were isolated based on enrichment for *Sftpc*, *Sftpa1*, *Sftpa2*, *Sftpb*,  
532 *Lamp3*, *Abca3*, *Hopx*, *Ager*, *Akap5*, *Epcam*, *Cdh1*, *Krt7*, *Krt8*, *Krt18*, *Krt19*, *Scgb1a1* and  
533 *Scgb3a1* as well as negative expressions of *Vim*, *Acta2*, *Pdgfra* and *Pdgfrb* in UMAP  
534 plots. The Rds files for control and idiopathic pulmonary fibrosis (IPF) lungs were obtained  
535 from GEO (#GSE135893)<sup>49</sup>. Cell clusters of AEC2, AEC1, transitional AEC2 and *KRT5*  
536 */KRT17*<sup>+</sup> were extracted and analyzed. Markers for each cluster (Supplementary Table 1)  
537 obtained using *FindAllMarkers* command in Seurat were utilized for identifying specific  
538 signaling pathways and gene ontology through Enrichr<sup>78</sup>. Z-scores were calculated  
539 based on combined score in Kyoto encyclopedia of genes and genomes (KEGG) to  
540 compare enrichment of signaling and ontology across different cell clusters. The results  
541 were displayed in heatmap format generated using an R package pheatmap v1.0.12.  
542 Scaled data in Seurat object were extracted and mean values of scaled score of gene  
543 members in each pathway were calculated and shown in UMAP as enrichment of  
544 signaling pathways. The gene member lists of utilized pathways were obtained from  
545 KEGG pathways<sup>79</sup> and AmiGO<sup>80</sup>. Log<sub>2</sub> fold changes and P-values in each gene extracted  
546 using *FindMarkers* command in Seurat with Wilcoxon rank sum test were shown in a  
547 volcano plot using an R package EnhancedVolcano v1.3.1  
548 (<https://github.com/kevinblighe/EnhancedVolcano>) to show specific markers for *Ctgf*<sup>+</sup>  
549 cells and *Lgals3*<sup>+</sup> cells.

550

551 **Mint-ChIP (Multiplexed indexed T7 ChIP-seq)**



552 FACS-sorted CD31<sup>-</sup>/CD45<sup>-</sup>/CD140a<sup>-</sup>/CD326<sup>+</sup>/CTGF-GFP<sup>+</sup> cells (PATS) from *Ctgf-GFP*  
553 mice treated with Bleomycin (d12) and CD31<sup>-</sup>/CD45<sup>-</sup>/CD326<sup>+</sup>/Lysotracker<sup>+</sup>/*Mki67-RFP*<sup>-</sup>  
554 cells (AEC2) from *Mki67-RFP* homeostatic mice were processed using Mint-ChIP  
555 described previously<sup>36</sup>. Open-sourced newest protocol named Mint-ChIP3 in protocol.io  
556 was used. Following cell lysis, chromatin was digested with 300 units reaction of MNase  
557 (#M0247S, New England Biolabs) at 37°C for 10 min. T7 adapter ligation was performed  
558 for 2 hrs and then the samples were split to have ~7,000 cells per antibody. The samples  
559 were incubated with Histone H3 (H3) antibody (1 ul, #39763, Active Motif), Histone H3  
560 lysine 36 trimethylation (H3K36me3) antibody (1 ul, #61101, Active Motif) or Histone H3  
561 lysine 4 trimethylation (H3K4me3) antibody (1 ul, #ab8580, Abcam) and Histone H3 lysine  
562 27 acetylation (H3K27ac) antibody (1 ul, #39133, Active Motif) at 4°C overnight. DNA was  
563 purified followed by T7-driving *in vitro* transcription at 37°C for 3 hrs. Reverse transcription  
564 was performed as described in original protocol followed by library preparation using  
565 Terra Direct PCR polymerase (#639271, TaKaRa). Two experimental replications were  
566 performed for each cell type. Libraries were sequenced using Hiseq X or NovaSeq 6000  
567 with at least 5M reads of 150-bp paired end per sample.

568

### 569 **Computational analyses for Mint-ChIP**

570 FASTQ files were generated using Bcl2fastq. Additional demultiplexing for Mint-ChIP  
571 FASTQ files were performed using Je<sup>81</sup>. Low quality reads were trimmed out from FASTQ  
572 files using trimmomatic v0.38<sup>82</sup>. Reads were mapped on mm10 genome reference using  
573 BWA<sup>83</sup>. HOMER<sup>84</sup> was used for generating bedGraph files to visualize them in  
574 Integrative Genomics Viewer (IGV)<sup>85</sup>. Peak calling for H3K4me3 was performed using

575 HOMER's *getDifferentialPeaksReplicates.pl* -region -size 1000 -minDist 2000 -C 0 -L 50  
576 with normalization by H3. Motif analysis was performed using HOMER's  
577 *findMotifsGenome.pl*. The packages were run through a pipeline called MintChIP  
578 (<https://github.com/jianhong/MintChIP>). deepTools <sup>86</sup> was used for generating a chart of  
579 called peaks of H3K4me3. Called peaks of H3K4me3 in both homeostatic AEC2 and  
580 PATS after bleomycin-induced lung injury were merged in Fig. 6g using Affinity Designer.  
581 Genes shown in Fig. 4a left panel were used to generate Fig. 6g.

582

### 583 **Human lung tissue**

584 Excised subtransplant-quality human lung tissues without preexisting chronic lung  
585 diseases were obtained from the Marsico Lung Institute at the University of North Carolina  
586 at Chapel Hill under a University of North Carolina Biomedical Institutional Review Board-  
587 approved protocol (#03-1396). Informed consent was obtained from all participants where  
588 necessary. Samples of explanted fibrotic human lungs were procured through the  
589 BioRepository and Precision Pathology Center at Duke University in accordance with  
590 institutional procedures (Duke University Pro00082379 – “Human Lung Stem Cells”;  
591 exempt research as described in 45 CFR 46.102(f), 21 CFR 56.102(e) and 21 CFR  
592 812.3(p) which satisfies the Privacy Rule as described in 45CFR164.514). The diagnosis  
593 of idiopathic pulmonary fibrosis (IPF) was evaluated by a surgical pathology team.  
594 Specimens were washed thoroughly in PBS prior to inflation and immersion in 4% PFA  
595 overnight at 4°C. Specimens were subsequently washed in PBS until the appearance of  
596 blood was minimal followed by incubation in 30% sucrose at 4°C. Samples were then

597 incubated with 1:1 mixture of OCT for 1 hour at 4°C before embedding in OCT. 7-9 µm  
598 thick sections were used for histological analysis.

599

## 600 **Immunostaining**

601 Lungs and alveolar organoids were prepared as described previously. Briefly, tissues  
602 were fixed with 4% paraformaldehyde (PFA) at 4°C for 4 h and at room temperature for  
603 30 min then embedded in OCT or Paraffin. 10-µm sectioned samples were utilized for  
604 staining following incubation at 95°C for 10-15 min for antigen retrieval using 10 mM  
605 sodium citrate. Primary antibodies were as follows: Pro-surfactant protein C (Millipore,  
606 ab3786, 1:500), AGER (R&D systems, MAB1179, 1:250), KRT8 (DSHB, TROMA-I, 1:50),  
607 KRT17 (NSJ, V2176; 1:250), KRT19 (DSHB, TROMA-III, 1:50), tdTomato (ORIGENE,  
608 AB8181-200, 1:500), CLDN4 (Invitrogen, 36-4800, 1:200), GFP (Novos Biologicals,  
609 NB100-1770, 1:500), LGALS3 (Cedarlane, CL8942AP, 1:500); SOX4 (Invitrogen, MA5-  
610 31424, 1:250), SFN (Invitrogen, PA5-95056, 1:250 or Proteintech, 66251-1-Ig, 1:500),  
611 ACTA2 (Sigma, C6198, 1:500), and , gamma-H2AX (R&D, 4418-APC, 1:500).

612

## 613 **β-Galactosidase (X-gal) staining and Hematoxylin & Eosin (H&E) staining**

614 PFA-fixed frozen sections were incubated with X-gal staining buffer containing 1 mg/ml  
615 of X-gal (Thermo, R0941), 5 mM K<sub>3</sub>Fe(CN)<sub>6</sub>, 5 mM K<sub>4</sub>Fe(CN)<sub>6</sub>, 2 mM MgCl<sub>2</sub>, 0.01%  
616 sodium deocycholate and 0.02% NP-40 at 37°C overnight. Sections were washed 3 time  
617 in PBS and mounted. For H&E staining, 10-µm paraffin sections were submerged in  
618 Histo-clear and series of ethanol. Mayer's Hematoxylin was used to stain nuclei, followed  
619 by staining using 1% Eosin Y.

620

## 621 **Image acquisition, processing and quantification**

622 Images were captured using Olympus Confocal Microscope FV3000 using a 20×, 40× or  
623 60× objective, a Zeiss wide-field fluorescence microscope (X-gal staining) and a Zeiss  
624 Axio Imager Widefield Fluorescence Microscope (H&E). Cells were manually counted  
625 based on IHC markers and DAPI. For determination of average intersects per linear  
626 distance, a mean linear intercept analysis was conducted as previously described<sup>87</sup> over  
627 the single channel immunofluorescence stain of interest. Images were processed using  
628 Olympus CellSens application or ImageJ and figures were prepared using Affinity  
629 Designer.

630

## 631 **Statistics**

632 Sample size was not predetermined. Data are presented as means with standard error  
633 (s.e.m) to indicate the variation within each experiment. Statistics analysis was performed  
634 in GraphPad Prism. A two-tailed Student's *t*-test was used for the comparison between  
635 two experimental conditions. We used Mann Whitney one tailed test for the comparison  
636 between two conditions that showed non-normal distributions.

637

## 638 **Acknowledgements**

639 We thank Brigid Hogan for advice and critical reading of the manuscript, Monica  
640 Fernandez de Soto for technical support and members of the Tata lab and Barkauskas  
641 lab for discussions. We thank Karen Lyons for providing *Ctgf*-GFP mice, Peter van Galen  
642 and Yu Xiang for help with Mint-ChIP analysis., the Duke Cancer Institute Flow Cytometry

643 Shared Resource for help with cell sorting, the Duke Sequencing and Genomic  
644 Technologies Shared Resource for sequencing NGS-libraries, the Duke University Light  
645 Microscopy Core Facility for imaging equipment and consultation, the Duke Biorepository  
646 & Precision Pathology Center for providing human specimens, the Duke Compute Cluster  
647 for help with sequencing data analysis. The TROMA-I (KRT8) antibody clone developed  
648 by Brulet, P/Kemler was obtained from the Developmental Studies Hybridoma Bank,  
649 created by the NICHD of the NIH and maintained at The University of Iowa, Department  
650 of Biology, Iowa City, IA 52242. Y.K. is a Japan Society for the Promotion of Science  
651 Overseas Research Fellow. A.K. is supported by a medical scientist training program  
652 fellowship from NHLBI/NIH (F30HL143911). Human scRNA-seq was supported by  
653 R01HL145372 (NEB/JAK), Doris Duke Charitable Foundation (JAK),  
654 K08HL130595(JAK), and Boehringer Ingelheim Pharmaceuticals (JAK). This work was  
655 supported by a Pathways to Independence award from NHLBI/NIH (R00HL127181) to  
656 P.R.T. and funds from Regeneration NeXT and Kaganov- MEDx Pulmonary Initiative at  
657 Duke University. This work was partially supported by funds from Whitehead foundation  
658 and P.R.T. is a Whitehead Scholar.

659

## 660 **Author contributions**

661 Y.K. designed, conceived and performed NGS-related experiments and the  
662 computational analysis, and co-wrote the manuscript; A.T. designed, conceived and  
663 performed in vivo and ex vivo experiments and immunostaining, and co-wrote the  
664 manuscript; A.K. designed and performed AEC1 ablation experiments; H.K. performed  
665 organoid experiments. R.F.L. performed histological analysis; J.O. built a pipeline for

666 Mint-ChIP analysis. N.E.B. and J.A.K. provided scRNA-seq data from healthy and IPF  
667 human lungs. P.R.T. designed, conceived and supervised the work and co-wrote the  
668 manuscript. All authors reviewed and edited the manuscript.

669

#### 670 **Competing interests**

671 Nothing to declare.

672

#### 673 **Additional information**

674 **Extended Data** is available online

675

676 **Data availability:** The data described in this manuscript are available from the  
677 corresponding author upon request. All the NGS sequencing data in this manuscript will  
678 be available at NCBI GEO (accession no. GSE will be provided upon acceptance of the  
679 manuscript).

680

#### 681 **Correspondence and requests for materials**

682 Correspondence and requests for materials should be addressed to P.R.T.

683

#### 684 **Figure legends**

685 **Figure 1. scRNA-seq reveals novel alveolar epithelial cell states in *ex vivo***  
686 **organoids.**

687 a, Schematic of alveolar organoid culture utilized for single-cell RNA-seq. b, Uniform  
688 manifold approximation and projection (UMAP) visualization of epithelial populations in

689 cultured alveolar organoids. AEC2 (green) – alveolar epithelial type-2 cells, AEC2-  
690 proliferating (pink) – proliferating alveolar epithelial type-2 cells, AEC1 (yellow) – alveolar  
691 epithelial type-1 cells, New cell states :*Lgals3*<sup>+</sup> cells (blue) and *Ctgf*<sup>+</sup> cells (red) c, UMAP  
692 plots show the expression of indicated genes in epithelial populations in cultured alveolar  
693 organoids. Dotted circles in b and c indicate the novel cell states. d, Volcano plot shows  
694 specific genes to *Ctgf*<sup>+</sup> population and *Lgals3*<sup>+</sup> population. e, Schematic of alveolar  
695 organoid culture using fibroblasts and AEC2 cells sorted from *SFTPC-GFP* mice. f,  
696 Immunostaining for PATS markers in alveolar organoids. Co-staining of LGALS3 (green)  
697 and SFTPC (red) is shown in left panel; localization of CLDN4 (red) - middle panel and  
698 *SFTPC-GFP* (green) co-stained with SOX4 (red) and SFTPC (grey) (right panel). DAPI  
699 stains nuclei (blue). Scale bars indicate 20 μm. Arrows indicate PATS.

700

701 **Figure 2. The novel alveolar cell states emerge transiently and originate from**  
702 **alveolar stem cells after alveolar injury *in vivo*.**

703 a, Schematic of bleomycin-induced lung injury in *Ctgf-GFP* mice. b-c, Immunostaining for  
704 PATS markers. b, co-staining for *Ctgf-GFP* (green), CLDN4 (red) and LGALS3 (grey), c,  
705 Co-staining for *Ctgf-GFP* (green), SFN (red) and LGALS3 (grey) in control lung (upper)  
706 and bleomycin-treated lungs collected on day 12 after injury (lower). d, Flowcytometric  
707 analysis of PATS in *Ctgf-GFP* mouse model. The percentage of *Ctgf-GFP* (CD31<sup>-</sup>/CD45<sup>-</sup>  
708 /EPCAM<sup>+</sup>) (red line) and LGALS3 (CD31<sup>-</sup>/CD45<sup>-</sup>/EPCAM<sup>+</sup>) (blue line) are shown as  
709 indicated in control (upper panel) and bleomycin injures (lower panel). e, Experimental  
710 design to ablate AEC1 cells in *Ager-CreER;R26R-DTR* mouse model. Mice were  
711 administered with tamoxifen (Tmx) followed by diphtheria toxin (DT) and tissue collection

712 on day 6. f, Immunostaining for CLDN4 (green) and LGALS3 (grey) in control (left) and  
713 AEC1-ablated lungs (right). g, Mean linear intercept length analysis of LGALS3<sup>+</sup> cells in  
714 control and AEC1-ablated lungs. Asterisks indicate  $p < 0.0002$  (un-paired student's t-test).  
715 Data are from three independent experiments and are presented as mean  $\pm$  s.e.m. h,  
716 Experimental workflow for sequential administration of tamoxifen followed by bleomycin  
717 injury and tissue collection for analysis using *Sftpc-CreER;R26R-tdTomato* mice. i-k,  
718 Immunostaining for PATS markers in *Sftpc*-lineage labeled cell in control (upper panel)  
719 and bleomycin injured lungs (lower panel). i, SFTPC (green), *Sftpc*-tdt (red) and LGALS3  
720 (grey), j, SFN (green), *Sftpc*-tdt (red) and AGER (grey), and k, CLDN4 (green), *Sftpc*-tdt  
721 (red) and AGER (grey). DAPI stains nuclei (blue). Scale bars indicate 30  $\mu$ m. White line  
722 box in merge image indicates region of single channel images shown in left side.

723

724 **Figure 3. Lineage tracing revealed that PATS generate AEC1.**

725 a, UMAP of epithelial populations in cultured alveolar organoids. Arrow indicates selected  
726 cell populations in the oval-shaped circle are shown in panel b. b, UMAP plots show the  
727 expression of indicated genes in the selected populations (oval-shaped circle in panel a).  
728 c, RNA velocity analysis for PATS and AEC1. Arrows indicate predicted lineage  
729 trajectories. d, Schematic representation of experimental design to sequentially  
730 administer bleomycin (injury) or PBS (control) followed by tamoxifen (to label *Krt19*-  
731 expressing cells) in *Krt19-CreER;R26R-tdTomato* mice. e. Immunostaining for SFTPC  
732 (green), *Krt19*-tdt (red) and AGER (grey). White arrows indicate SFTPC<sup>+</sup>, *Krt19*-tdt<sup>+</sup> cells.  
733 Yellow arrowhead indicates AGER<sup>+</sup>, *Krt19*-tdt<sup>+</sup> cells. (Scale bar: 30  $\mu$ m). f, Co-staining  
734 for SFN (green), *Krt19*-tdt (red) and AGER (grey). White arrows indicate SFN<sup>+</sup>, *Krt19*-tdt<sup>+</sup>



735 cells. Yellow arrowhead indicates SFN<sup>+</sup>, *Krt19*-tdt<sup>+</sup>, AGER<sup>+</sup> cell. (Scale bar: 50  $\mu$ m). g.  
736 Immunostaining for CLDN4 (green), *Krt19*-tdt (red) and LGALS3 (grey). White arrows  
737 indicate CLDN4<sup>+</sup>, *Krt19*-tdt<sup>+</sup> cells. Yellow arrowhead demonstrates LGALS3<sup>+</sup>, *Krt19*-tdt<sup>+</sup>  
738 cell. (Scale bar: 30  $\mu$ m). e-g Control lungs are shown in left panels and bleomycin day 12  
739 injured lungs are shown in right panels. DAPI stains nuclei (blue). White line box in merge  
740 image indicates region of single channel images shown in left side.

741

#### 742 **Figure 4. Gene expression signatures and signaling pathways enriched in PATS**

743 a, Heatmap shows marker gene expression of each cell population in alveolar organoids  
744 (left) and in LPS-treated murine lungs (right) (scale shows z-score). Table on the right  
745 indicates genes enriched in the indicated pathways and cellular processes specifically in  
746 PATS. b, KEGG pathways enriched in PATS. Scale shows log<sub>2</sub> (combined score)  
747 obtained from web-based tool - Enrichr. c, UMAP rendering of PATS enriched signaling  
748 pathways and cellular processes in alveolar organoids (left) and LPS-treated murine  
749 lungs (right).

750

#### 751 **Figure 5. PATS undergo stretch-induced DNA damage *in vivo* and *ex vivo***

752 a, Schematic of bleomycin-induced lung injury in *Sftpc-CreER;R26RtdTomato* mice.  
753 Immunostaining for b,  $\beta$ -galactosidase staining in bleomycin injured and control lungs. c,  
754  $\gamma$ H2AX (green), *Sftpc*-tdt (red) and LGALS3 (grey) in control (upper) and bleomycin-  
755 treated lung collected on 12 days after the injury (lower). Inset on the right side in c shows  
756 the higher magnification of region indicated by dotted yellow box. DAPI stains nuclei  
757 (blue). Scale bar: 30  $\mu$ m. d, Quantification of  $\gamma$ H2AX<sup>+</sup> cells in *Sftpc*-tdt<sup>+</sup> cells in control and

758 bleomycin day 10 injured mice. Asterisks indicate  $p < 0.0008$  (un-paired student's t-test).  
759 Data are from three independent experiments and are presented as mean  $\pm$  s.e.m. e,  
760 Schematic of AEC1 ablation using diphtheria toxin (DT). f,  $\beta$ -galactosidase staining in DT-  
761 treated and control lungs. g, Co-staining for  $\gamma$ H2AX (red) and LGALS3 (grey) in control  
762 (left) and DT-treated lung collected on 6 days after the injury (right). White arrows indicate  
763  $\gamma$ H2AX<sup>+</sup>, LGALS3<sup>+</sup> cells. Scale bar 20  $\mu$ m h, Quantification of LGALS<sup>+</sup>/ $\gamma$ H2AX<sup>+</sup> cells in  
764 total  $\gamma$ H2AX<sup>+</sup> cells in control and DT-treated lung. Asterisk indicates  $p = 0.05$ . Data are  
765 from three independent experiments and are presented as mean  $\pm$  s.e.m. i, Schematic  
766 of alveolar organoid culture. j, Co-staining for SFTPC-GFP (green) and  $\gamma$ H2AX (red) in  
767 alveolar organoids. Inset on the right side shows the higher magnification of region  
768 indicated by dotted yellow box. White arrowheads indicate  $\gamma$ H2AX<sup>+</sup> cells Scale bar: 30  
769  $\mu$ m. k, Schematic of 2D culture of AEC2. l, Immunostaining for SFTPC-GFP (green),  
770  $\gamma$ H2AX (red) and AGER (grey) in 2D culture of AEC2.

771

## 772 **Figure 6. Transcriptional control of PATS by TP53 signaling**

773 a. Experimental workflow for sequential administration of tamoxifen followed by PBS or  
774 bleomycin (d0) administration and Nutlin-3a or DMSO treatment (d8-18) and tissue  
775 collection (d20) for analysis using *Sftpc-CreER;R26R-tdTomato* mice. b, Co-staining of  
776 SFTPC (green), *Sftpc*-tdt (red) and AGER (grey) in PBS+Nutlin-3a (left panel),  
777 bleomycin+DMSO (middle panel) and bleomycin+Nutlin-3a (right panel) treated mice.  
778 DAPI stains nuclei (blue). Scale bar: 100  $\mu$ m. c, Quantification of AGER<sup>+</sup>tdt<sup>+</sup> cells in total  
779 AGER<sup>+</sup> normalized to *Sftpc*-tdt labeling efficiency. Asterisk shows  $p = 0.036$ . Data are  
780 from three independent experiments and are presented as mean  $\pm$  s.e.m. d. Schematic

781 of alveolar organoid culture treated with Nutlin-3a. e, Immunostaining for Ki67 (green)  
782 and AGER (grey) in control or Nutlin-3a treated alveolar organoids. DAPI stains nuclei  
783 (blue). Scale bar: 30  $\mu$ m. f, Schematic of bleomycin-induced lung injury in *Ctgf-GFP* mice.  
784 g, Distribution of H3K4me3 peaks in PATS marker gene loci in PATS (red line) and  
785 homeostatic AEC2 (blue line). i,j, Transcriptional activity of known TP53 target genes  
786 (*Mdm2* and *Fas*) in PATS compared to AEC2s. Arrowhead indicates location of predicted  
787 TP53 binding motifs. Green-shade regions are promoter or enhancer.

788

789 **Figure 7. Enrichment of PATS-like states in IPF suggests persistence of this state**  
790 **in pathological milieu**

791 a, UMAP shows scRNA-seq data from alveolar epithelial cells in healthy and IPF lungs.  
792 b, RNA velocity analysis predicts lineage trajectories in alveolar epithelial cell populations.  
793 Arrows indicates strong RNA velocities. c, UMAP plots show the expression of indicated  
794 genes in healthy and IPF lung scRNA-seq data. d, UMAP plots show enrichment of  
795 candidate signaling pathways healthy and IPF lung scRNA-seq data. e, Heatmap showing  
796 expression of known target genes of indicated signaling pathways in AEC1, AEC2, and  
797 PATS-like state. Scale indicates z-score where red is high, and blue is low. f, Violin plots  
798 showing IPF-relevant gene expression in indicated cell types/cell states in control and IPF  
799 lungs. g-h, Co-staining for PATS-like markers in human IPF lungs. g, Quadruple  
800 immunostaining for SFN (green), HTII-280 (red), KRT17 (grey) and ACTA2 (blue) in IPF  
801 lung. White arrows indicate SFN<sup>+</sup>, HTII-280<sup>+</sup> cells. Yellow arrowheads demonstrate SFN<sup>+</sup>,  
802 KRT17, HTII-280<sup>+</sup> cells. h, Quantification of SFN<sup>+</sup> cells in total HTII-280<sup>+</sup> cells. Data are  
803 from three independent experiments and are presented as mean  $\pm$  s.e.m. Asterisks

804 indicate  $p < 0.0001$ . i, Left panel shows triple immunostaining for SFN (green), HTII-280  
805 (red) and AGER (grey) and right panel shows triple immunostaining for SFN (green),  
806 CLDN4 (red) and LGALS (grey). j, Quadruple immunostaining for senescence marker p21  
807 (green), in combination with SFN (blue), ACTA2 (red) and KRT17 (grey). White arrows  
808 show SFN<sup>+</sup>, KRT17<sup>+</sup>, p21<sup>+</sup> triple positive cells surrounded by ACTA2 (red) positive cells  
809 (left panel). Quadruple immunostaining for  $\gamma$ H2AX (green), SFN (blue), HTII-280 (grey)  
810 and ACTA2 (red) in IPF lungs (right panel). Inset indicates region of single channel  
811 images shown in left side. Scale bars in g-i indicate 100  $\mu$ m. j, k,  $\beta$ -galactosidase staining  
812 in IPF lung. Black arrows indicate X-gal staining in epithelial cells. See Supplementary  
813 Fig. 9 for all corresponding immunostainings on control lungs. Scale bar indicates 100  
814  $\mu$ m.

815

816 **Figure 8. Schematic describing alveolar stem cell-mediated epithelial regeneration**  
817 **and disease pathogenesis.**

818 Alveolar stem cells replicate in response to damage and generate a novel transitional cell  
819 state which normally matures into functional alveolar type-1 epithelial cells. The newly  
820 identified transitional state is vulnerable to DNA damage and undergoes a transient  
821 senescent state. This novel state is enriched in human fibrotic lungs.

822

823

824 **Supplementary Figure legends**

825 **Supplementary Figure 1. scRNA-seq segregates distinct alveolar population with**  
826 **specific markers.**

827 a, Pearson correlation plot visualizes the number of genes per cell (nGene) and unique  
828 molecular identifier (nUMI) in total cells derived from alveolar organoids. b, UMAP shows  
829 major cell populations including epithelial cells (green), fibroblasts (red), and some minor  
830 populations such as endothelial cells (blue) and macrophages (purple) in alveolar  
831 organoids. c, UMAP plots show the expression of indicated genes in epithelial cell  
832 populations derived from our alveolar organoid scRNA-seq datasets.

833

834 **Supplementary Figure 2. scRNA-seq analysis revealed the emergence of a novel**  
835 **epithelial cell population after LPS-induced lung injury *in vivo*.**

836 a, UMAP shows homeostatic (red) and LPS-treated (blue) lung alveolar epithelial cells.

837 b, Distinct cell populations in alveolar epithelial cells in control and LPS-treated lungs. c,

838 UMAP plots show the expression of indicated genes in alveolar epithelial cells in control  
839 and LPS-treated lungs.

840

841 **Supplementary Figure 3. Specific markers are expressed in the novel alveolar**  
842 **population in the lungs following bleomycin treatment *in vivo*.**

843 a, Schematic of bleomycin-induced lung injury in *Ctgf*-GFP mice. b, Immunostaining for

844 *Ctgf*-GFP (green), KRT8 (red) and SFTPC (grey) in control lung (left) and bleomycin day  
845 12 injured mice (right). Magnified single channel images are shown on the right. White

846 line box indicates magnified region. c, Quantification of signal intensity of KRT8  
847 immunostaining in control (black circles) and experimental lung 12 days after bleomycin

848 injury (black rectangles);  $p < 0.0001$ ; Wilcoxon rank sum test. d, Quantification of KRT8<sup>lo</sup>,

849 KRT8<sup>hi</sup> and KRT8<sup>hi</sup>/GFP<sup>+</sup> subpopulations of SFTPC<sup>+</sup> cells in control lung (white bars) and

850 lung 12 days after bleomycin injury (gray bars). Error bars, mean  $\pm$  s.e.m (n = 3). KRT8<sup>lo</sup>-  
851 P=1 X 10<sup>-5</sup>; KRT8<sup>hi</sup>- P=1 X 10<sup>-4</sup>; KRT8<sup>hi</sup> *Ctgf*-GFP<sup>+</sup>- P=2.6 X 10<sup>-3</sup>. e, Immunostaining for  
852 *Ctgf*-GFP (green), KRT8 (red) and Ki67 (grey), e, for *Ctgf*-GFP (green), Ki67 (red) and  
853 SFTPC (grey) on bleomycin-treated lungs collected on 12 days post injury. DAPI stains  
854 nuclei (blue). Scale bars indicate 20  $\mu$ m.

855

856 **Supplementary Figure 4. Expression of markers specific to the novel alveolar**  
857 **population in AEC1-specific ablation mouse model.**

858 a-d, Co-immunostaining for a) SFN (green) and LGALS3 (grey) or b) SFTPC (green) and  
859 LGALS3 (grey) or c) SFN (green) and KRT19 (red) or d) LGALS3 (green) and Ki67 (red)  
860 in control (left) and AEC1-ablated lungs (right). DAPI stains nuclei (blue). Scale bars  
861 indicate 20  $\mu$ m.

862

863 **Supplementary Figure 5. AEC2-derived cells are the cell-of-origin for the novel**  
864 **alveolar cell state following bleomycin-induced lung injury.**

865 a, Schematic of AEC2 lineage tracing using *Sftpc-CreER;R26R-tdTomato* mice.

866 Tamoxifen was given 2 weeks prior to PBS or bleomycin administration followed by

867 tissue harvest. b, Immunostaining for KRT8 (green), *Sftpc*-tdt (red) and SFTPC (grey).

868 c, Co-staining for KRT8 (green), *Sftpc*-tdt (red) and CLDN4 (grey) in control (upper) and

869 bleomycin-treated lungs (lower). White boxed insets are shown on the right in each

870 panel. DAPI stains nuclei (blue). Scale bars indicate 50  $\mu$ m.

871

872 **Supplementary Figure 6. Lineage tracing revealed that PATS differentiate into**  
873 **AEC1 following bleomycin-induced alveolar injury *in vivo*.**

874 a, Immunostaining for SFN (green), *Krt19*-tdt (red) and AGER (grey) in control (upper)  
875 and bleomycin-treated lungs (lower). Scale bars 100  $\mu$ m. b, Quantification of *Krt19*-tdt<sup>+</sup>  
876 cells in total SFTPC<sup>+</sup> cells in injured regions. Asterisk shows  $p < 0.031$ . (Mann-Whitney  
877 test) Data are from three independent experiments and are presented as mean  $\pm$  s.e.m.  
878 c, Quantification of *Krt19*-tdt<sup>+</sup> cells in total AGER<sup>+</sup> cells. In left image the quantification  
879 strategy is shown. Cells were identified based on co-localization of *Krt19*-tdt, AGER and  
880 DAPI (yellow dotted lines) or AGER and DAPI (green dotted lines). Graph shows the  
881 percentage of KRT19<sup>+</sup>, AGER<sup>+</sup> cells in total AGER<sup>+</sup> cells in control and bleomycin injured  
882 mice on day-12. Data are from three independent experiments and are presented as  
883 mean  $\pm$  s.e.m. Asterisk shows  $p < 0.0001$ . d, Immunostaining for CLU (green)/*Krt19*-  
884 tdTomato (red) in bleomycin-treated lungs. DAPI stains nuclei (blue). Scale bars indicate  
885 30  $\mu$ m.

886

887 **Supplementary Figure 7. Histone marks profiling revealed active promoters and**  
888 **transcribing genomic loci in AEC2 and PATS following bleomycin-induced lung**  
889 **injury.**

890 Genomic tracks show enrichment of H3K4me3 and H3K36me3 in a), AEC2-specific gene  
891 loci (*Sftpc*) and b), PATS-specific gene loci (*Fn1*). H3K4me3 distribution and predicted  
892 binding motifs of NF1, ETS1 and ATF3 in c, *Lgals3* and d, *Sox4* loci. Blue and Red tracks  
893 indicate homeostatic AEC2 and PATS in bleomycin-induced lung injury, respectively. y-  
894 axis in AEC2 and PATS in all panels are normalized.

895

896 **Supplementary Figure 8. scRNA-seq analysis revealed the accumulation of PATS-**  
897 **like cells of human fibrotic lungs.**

898 a, Heatmap shows expression of marker genes of each cell population in human lungs  
899 (scale shows z-score). b, UMAP plots show the expression of indicated genes in alveolar  
900 epithelial populations in healthy controls and fibrotic human lungs. c, KEGG pathway  
901 enrichment analysis shows signaling pathways highly represented in PATS-like cells in  
902 human lungs. Scale shows  $\log_2$  (combined score) obtained from Enrichr (see methods  
903 section for details). d, Violin plots shows the relative gene expression levels of indicated  
904 genes and cell types in control and IPF lungs.

905

906 **Supplementary Figure 9. Markers specific to PATS-like cells are specifically**  
907 **expressed in human fibrotic lungs but not in healthy controls.**

908 a, Hematoxylin and Eosin staining of IPF lung section. Scale bar indicates 200  $\mu\text{m}$ . b-e,  
909 Immunostaining for PATS-like markers in healthy human lungs. b, Co-staining for SFN  
910 (green), CLDN4 (red) and LGALS3 (grey), c, Immunostaining for SFN (green), HTII-280  
911 (red) and AGER (grey), d, Co-staining for SFN (blue), p21 (green), ACTA2 (red) and  
912 KRT17 (grey) and e, Immunostaining for  $\gamma\text{H2AX}$  (green), SFN (blue), ACTA2 (red) and  
913 HTII-280 (grey). White line box in merged images indicate region of single channel  
914 images shown on right. In f and g DAPI (blue) stains nuclei. f, Immunostaining for SFN  
915 (green), TP63 (blue), HTII-280 (grey) and ACTA2 (red) in healthy (left panel) and IPF  
916 lungs (right panel). Scale bars indicate 100  $\mu\text{m}$ .

917



918

919 **References**

- 920 1. Hogan, B. L. M. *et al.* Repair and regeneration of the respiratory system: complexity,  
921 plasticity, and mechanisms of lung stem cell function. *Cell Stem Cell* **15**, 123–138 (2014).
- 922 2. Zepp, J. A. & Morrisey, E. E. Cellular crosstalk in the development and regeneration of the  
923 respiratory system. *Nat. Rev. Mol. Cell Biol.* (2019) doi:10.1038/s41580-019-0141-3.
- 924 3. Scadden, D. T. Nice neighborhood: emerging concepts of the stem cell niche. *Cell* **157**, 41–  
925 50 (2014).
- 926 4. Hsu, Y.-C., Pasolli, H. A. & Fuchs, E. Dynamics between stem cells, niche, and progeny in  
927 the hair follicle. *Cell* **144**, 92–105 (2011).
- 928 5. van Es, J. H. *et al.* Dll1+ secretory progenitor cells revert to stem cells upon crypt damage.  
929 *Nat. Cell Biol.* **14**, 1099–1104 (2012).
- 930 6. Shivdasani, A. A. & Ingham, P. W. Regulation of stem cell maintenance and transit  
931 amplifying cell proliferation by tgf-beta signaling in Drosophila spermatogenesis. *Curr. Biol.*  
932 **13**, 2065–2072 (2003).
- 933 7. Rock, J. R. *et al.* Notch-dependent differentiation of adult airway basal stem cells. *Cell Stem*  
934 *Cell* **8**, 639–648 (2011).
- 935 8. Papayannopoulou, T. & Scadden, D. T. Stem-cell ecology and stem cells in motion. *Blood*  
936 **111**, 3923–3930 (2008).
- 937 9. Nabhan, A., Brownfield, D. G., Harbury, P. B., Krasnow, M. A. & Desai, T. J. Single-cell  
938 Wnt signaling niches maintain stemness of alveolar type 2 cells. *Science* (2018)  
939 doi:10.1126/science.aam6603.

- 940 10. Barkauskas, C. E. *et al.* Type 2 alveolar cells are stem cells in adult lung. *J. Clin. Invest.* **123**,  
941 3025–3036 (2013).
- 942 11. Desai, T. J., Brownfield, D. G. & Krasnow, M. A. Alveolar progenitor and stem cells in lung  
943 development, renewal and cancer. *Nature* **507**, 190–194 (2014).
- 944 12. Zacharias, W. J. *et al.* Regeneration of the lung alveolus by an evolutionarily conserved  
945 epithelial progenitor. *Nature* **555**, 251–255 (2018).
- 946 13. Zepp, J. A. *et al.* Distinct Mesenchymal Lineages and Niches Promote Epithelial Self-  
947 Renewal and Myofibrogenesis in the Lung. *Cell* **170**, 1134-1148.e10 (2017).
- 948 14. Tata, P. R. & Rajagopal, J. Plasticity in the lung: making and breaking cell identity.  
949 *Development* **144**, 755–766 (2017).
- 950 15. Lange, A. W. *et al.* Hippo/Yap signaling controls epithelial progenitor cell proliferation and  
951 differentiation in the embryonic and adult lung. *J Mol Cell Biol* **7**, 35–47 (2015).
- 952 16. Weibel, E. R. Lung morphometry: the link between structure and function. *Cell Tissue Res.*  
953 **367**, 413–426 (2017).
- 954 17. Hogan, B. & Tata, P. R. Cellular organization and biology of the respiratory system. *Nat.*  
955 *Cell Biol.* (2019) doi:10.1038/s41556-019-0357-7.
- 956 18. Frank, D. B. *et al.* Emergence of a Wave of Wnt Signaling that Regulates Lung  
957 Alveologenesis by Controlling Epithelial Self-Renewal and Differentiation. *Cell Rep* **17**,  
958 2312–2325 (2016).
- 959 19. Chung, M.-I., Bujnis, M., Barkauskas, C. E., Kobayashi, Y. & Hogan, B. L. M. Niche-  
960 mediated BMP/SMAD signaling regulates lung alveolar stem cell proliferation and  
961 differentiation. *Development* **145**, dev163014 (2018).

- 962 20. LaCanna, R. *et al.* Yap/Taz regulate alveolar regeneration and resolution of lung  
963 inflammation. *J. Clin. Invest.* **129**, 2107–2122 (2019).
- 964 21. Finn, J. *et al.* Dlk1-Mediated Temporal Regulation of Notch Signaling Is Required for  
965 Differentiation of Alveolar Type II to Type I Cells during Repair. *Cell Rep* **26**, 2942-2954.e5  
966 (2019).
- 967 22. Riemondy, K. A. *et al.* Single cell RNA sequencing identifies TGF $\beta$  as a key regenerative  
968 cue following LPS-induced lung injury. *JCI Insight* **5**, (2019).
- 969 23. Hall-Glenn, F. *et al.* CCN2/connective tissue growth factor is essential for pericyte adhesion  
970 and endothelial basement membrane formation during angiogenesis. *PLoS ONE* **7**, e30562  
971 (2012).
- 972 24. Strunz, M. *et al.* Longitudinal single cell transcriptomics reveals Krt8+ alveolar epithelial  
973 progenitors in lung regeneration. *bioRxiv* 705244 (2019) doi:10.1101/705244.
- 974 25. Rock, J. R. *et al.* Multiple stromal populations contribute to pulmonary fibrosis without  
975 evidence for epithelial to mesenchymal transition. *Proc. Natl. Acad. Sci. U.S.A.* **108**, E1475-  
976 1483 (2011).
- 977 26. La Manno, G. *et al.* RNA velocity of single cells. *Nature* **560**, 494–498 (2018).
- 978 27. Ward, H. E. & Nicholas, T. E. Alveolar type I and type II cells. *Aust N Z J Med* **14**, 731–734  
979 (1984).
- 980 28. Weibel, E. R. On the tricks alveolar epithelial cells play to make a good lung. *Am. J. Respir.*  
981 *Crit. Care Med.* **191**, 504–513 (2015).
- 982 29. Katsura, H., Kobayashi, Y., Tata, P. R. & Hogan, B. L. M. IL-1 and TNF $\alpha$  Contribute to the  
983 Inflammatory Niche to Enhance Alveolar Regeneration. *Stem Cell Reports* **12**, 657–666  
984 (2019).

- 985 30. Xi, Y. *et al.* Local lung hypoxia determines epithelial fate decisions during alveolar  
986 regeneration. *Nat. Cell Biol.* **19**, 904–914 (2017).
- 987 31. Antony, V. B. & Thannickal, V. J. Cellular Senescence in Chronic Obstructive Pulmonary  
988 Disease: Multifaceted and Multifunctional. *Am. J. Respir. Cell Mol. Biol.* **59**, 135–136  
989 (2018).
- 990 32. Mandal, P. K., Blanpain, C. & Rossi, D. J. DNA damage response in adult stem cells:  
991 pathways and consequences. *Nat. Rev. Mol. Cell Biol.* **12**, 198–202 (2011).
- 992 33. Raab, M. *et al.* ESCRT III repairs nuclear envelope ruptures during cell migration to limit  
993 DNA damage and cell death. *Science* **352**, 359–362 (2016).
- 994 34. Li, J. *et al.* The Strength of Mechanical Forces Determines the Differentiation of Alveolar  
995 Epithelial Cells. *Dev. Cell* **44**, 297–312.e5 (2018).
- 996 35. Spike, B. T. & Wahl, G. M. p53, Stem Cells, and Reprogramming: Tumor Suppression  
997 beyond Guarding the Genome. *Genes Cancer* **2**, 404–419 (2011).
- 998 36. van Galen, P. *et al.* A Multiplexed System for Quantitative Comparisons of Chromatin  
999 Landscapes. *Molecular Cell* **61**, 170–180 (2016).
- 1000 37. Soldatenkov, V. A. *et al.* Regulation of the human poly(ADP-ribose) polymerase promoter  
1001 by the ETS transcription factor. *Oncogene* **18**, 3954–3962 (1999).
- 1002 38. Zhu, Y. *et al.* Early inactivation of p53 tumor suppressor gene cooperating with NF1 loss  
1003 induces malignant astrocytoma. *Cancer Cell* **8**, 119–130 (2005).
- 1004 39. Fan, F. *et al.* ATF3 induction following DNA damage is regulated by distinct signaling  
1005 pathways and over-expression of ATF3 protein suppresses cells growth. *Oncogene* **21**,  
1006 7488–7496 (2002).

- 1007 40. Pan, X. *et al.* Induction of SOX4 by DNA damage is critical for p53 stabilization and  
1008 function. *Proceedings of the National Academy of Sciences* **106**, 3788–3793 (2009).
- 1009 41. Nag, S., Qin, J., Srivenugopal, K. S., Wang, M. & Zhang, R. The MDM2-p53 pathway  
1010 revisited. *J Biomed Res* **27**, 254–271 (2013).
- 1011 42. Bonnans, C., Chou, J. & Werb, Z. Remodelling the extracellular matrix in development and  
1012 disease. *Nat. Rev. Mol. Cell Biol.* **15**, 786–801 (2014).
- 1013 43. Zhou, Y. *et al.* Extracellular matrix in lung development, homeostasis and disease. *Matrix*  
1014 *Biol.* **73**, 77–104 (2018).
- 1015 44. Trappmann, B. *et al.* Extracellular-matrix tethering regulates stem-cell fate. *Nat Mater* **11**,  
1016 642–649 (2012).
- 1017 45. Burgess, J. K., Mauad, T., Tjin, G., Karlsson, J. C. & Westergren-Thorsson, G. The  
1018 extracellular matrix - the under-recognized element in lung disease? *J. Pathol.* **240**, 397–409  
1019 (2016).
- 1020 46. Wasnick, R. M. *et al.* Restored alveolar epithelial differentiation and reversed human lung  
1021 fibrosis upon Notch inhibition. *bioRxiv* 580498 (2019) doi:10.1101/580498.
- 1022 47. Fernandez, I. E. & Eickelberg, O. New cellular and molecular mechanisms of lung injury and  
1023 fibrosis in idiopathic pulmonary fibrosis. *Lancet* **380**, 680–688 (2012).
- 1024 48. Gulati, S. & Thannickal, V. J. The Aging Lung and Idiopathic Pulmonary Fibrosis. *Am. J.*  
1025 *Med. Sci.* **357**, 384–389 (2019).
- 1026 49. Habermann, A. C. *et al.* Single-cell RNA-sequencing reveals profibrotic roles of distinct  
1027 epithelial and mesenchymal lineages in pulmonary fibrosis. *bioRxiv* 753806 (2019)  
1028 doi:10.1101/753806.

- 1029 50. Adams, T. S. *et al.* Single Cell RNA-seq reveals ectopic and aberrant lung resident cell  
1030 populations in Idiopathic Pulmonary Fibrosis. *bioRxiv* 759902 (2019) doi:10.1101/759902.
- 1031 51. Cheng, D. *et al.* Airway epithelium controls lung inflammation and injury through the NF-  
1032 kappa B pathway. *J. Immunol.* **178**, 6504–6513 (2007).
- 1033 52. McConnell, A. M. *et al.* p53 Regulates Progenitor Cell Quiescence and Differentiation in the  
1034 Airway. *Cell Reports* **17**, 2173–2182 (2016).
- 1035 53. Peng, X. *et al.* SOX4 contributes to TGF- $\beta$ -induced epithelial-mesenchymal transition and  
1036 stem cell characteristics of gastric cancer cells. *Genes Dis* **5**, 49–61 (2018).
- 1037 54. Zhang, J. *et al.* SOX4 induces epithelial-mesenchymal transition and contributes to breast  
1038 cancer progression. *Cancer Res.* **72**, 4597–4608 (2012).
- 1039 55. Tiwari, N. *et al.* Sox4 is a master regulator of epithelial-mesenchymal transition by  
1040 controlling Ezh2 expression and epigenetic reprogramming. *Cancer Cell* **23**, 768–783  
1041 (2013).
- 1042 56. Zhang, M. *et al.* Chop deficiency prevents UUO-induced renal fibrosis by attenuating  
1043 fibrotic signals originated from Hmgb1/TLR4/NF $\kappa$ B/IL-1 $\beta$  signaling. *Cell Death Dis* **6**,  
1044 e1847 (2015).
- 1045 57. Lipson, K. E., Wong, C., Teng, Y. & Spong, S. CTGF is a central mediator of tissue  
1046 remodeling and fibrosis and its inhibition can reverse the process of fibrosis. *Fibrogenesis*  
1047 *Tissue Repair* **5**, S24 (2012).
- 1048 58. Kropski, J. A., Lawson, W. E., Young, L. R. & Blackwell, T. S. Genetic studies provide  
1049 clues on the pathogenesis of idiopathic pulmonary fibrosis. *Disease Models & Mechanisms*  
1050 **6**, 9–17 (2013).

- 1051 59. da Silva, A. L. G. *et al.* Evaluation of DNA damage in COPD patients and its correlation  
1052 with polymorphisms in repair genes. *BMC Med. Genet.* **14**, 93 (2013).
- 1053 60. Sauler, M. *et al.* The DNA repair transcriptome in severe COPD. *Eur. Respir. J.* **52**, (2018).
- 1054 61. McDonough, J. E. *et al.* A role for telomere length and chromosomal damage in idiopathic  
1055 pulmonary fibrosis. *Respir Res* **19**, (2018).
- 1056 62. Muñoz-Espín, D. & Serrano, M. Cellular senescence: from physiology to pathology. *Nat.*  
1057 *Rev. Mol. Cell Biol.* **15**, 482–496 (2014).
- 1058 63. McGregor, A. L., Hsia, C.-R. & Lammerding, J. Squish and squeeze—the nucleus as a  
1059 physical barrier during migration in confined environments. *Current Opinion in Cell Biology*  
1060 **40**, 32–40 (2016).
- 1061 64. Ciccia, A. & Elledge, S. J. The DNA Damage Response: Making It Safe to Play with Knives.  
1062 *Molecular Cell* **40**, 179–204 (2010).
- 1063 65. Mercado, N., Ito, K. & Barnes, P. J. Accelerated ageing of the lung in COPD: new concepts.  
1064 *Thorax* **70**, 482–489 (2015).
- 1065 66. Gorgoulis, V. *et al.* Cellular Senescence: Defining a Path Forward. *Cell* **179**, 813–827  
1066 (2019).
- 1067 67. Storer, M. *et al.* Senescence Is a Developmental Mechanism that Contributes to Embryonic  
1068 Growth and Patterning. *Cell* **155**, 1119–1130 (2013).
- 1069 68. Means, A. L., Xu, Y., Zhao, A., Ray, K. C. & Gu, G. A CK19CreERT knockin mouse line  
1070 allows for conditional DNA recombination in epithelial cells in multiple endodermal organs.  
1071 *genesis* **46**, 318–323 (2008).
- 1072 69. Arenkiel, B. R. *et al.* Activity-induced remodeling of olfactory bulb microcircuits revealed  
1073 by monosynaptic tracing. *PLoS ONE* **6**, e29423 (2011).

- 1074 70. Madisen, L. *et al.* A robust and high-throughput Cre reporting and characterization system  
1075 for the whole mouse brain. *Nat Neurosci* **13**, 133–140 (2010).
- 1076 71. Lo, B., Hansen, S., Evans, K., Heath, J. K. & Wright, J. R. Alveolar Epithelial Type II Cells  
1077 Induce T Cell Tolerance to Specific Antigen. *The Journal of Immunology* **180**, 881–888  
1078 (2008).
- 1079 72. Chung, M.-I. & Hogan, B. L. M. *Ager-CreER<sup>T2</sup>* : A New Genetic Tool for Studying Lung  
1080 Alveolar Development, Homeostasis, and Repair. *Am J Respir Cell Mol Biol* **59**, 706–712  
1081 (2018).
- 1082 73. Buch, T. *et al.* A Cre-inducible diphtheria toxin receptor mediates cell lineage ablation after  
1083 toxin administration. *Nat Methods* **2**, 419–426 (2005).
- 1084 74. Basak, O. *et al.* Mapping early fate determination in Lgr5+ crypt stem cells using a novel  
1085 Ki67-RFP allele. *The EMBO Journal* **33**, 2057–2068 (2014).
- 1086 75. Macosko, E. Z. *et al.* Highly Parallel Genome-wide Expression Profiling of Individual Cells  
1087 Using Nanoliter Droplets. *Cell* **161**, 1202–1214 (2015).
- 1088 76. Stuart, T. *et al.* Comprehensive Integration of Single-Cell Data. *Cell* **177**, 1888-1902.e21  
1089 (2019).
- 1090 77. Manno, G. L. *et al.* RNA velocity of single cells. *Nature* **560**, 494 (2018).
- 1091 78. Kuleshov, M. V. *et al.* Enrichr: a comprehensive gene set enrichment analysis web server  
1092 2016 update. *Nucleic Acids Res* **44**, W90–W97 (2016).
- 1093 79. Kanehisa, M. & Goto, S. KEGG: Kyoto Encyclopedia of Genes and Genomes. *Nucleic Acids*  
1094 *Res* **28**, 27–30 (2000).
- 1095 80. Carbon, S. *et al.* AmiGO: online access to ontology and annotation data. *Bioinformatics* **25**,  
1096 288–289 (2009).



- 1097 81. Girardot, C., Scholtalbers, J., Sauer, S., Su, S.-Y. & Furlong, E. E. M. Je, a versatile suite to  
1098 handle multiplexed NGS libraries with unique molecular identifiers. *BMC Bioinformatics* **17**,  
1099 419 (2016).
- 1100 82. Bolger, A. M., Lohse, M. & Usadel, B. Trimmomatic: a flexible trimmer for Illumina  
1101 sequence data. *Bioinformatics* **30**, 2114–2120 (2014).
- 1102 83. Li, H. & Durbin, R. Fast and accurate short read alignment with Burrows-Wheeler transform.  
1103 *Bioinformatics* **25**, 1754–1760 (2009).
- 1104 84. Simple Combinations of Lineage-Determining Transcription Factors Prime cis-Regulatory  
1105 Elements Required for Macrophage and B Cell Identities | Elsevier Enhanced Reader.  
1106 [https://reader.elsevier.com/reader/sd/pii/S1097276510003667?token=EB605C1A491037738](https://reader.elsevier.com/reader/sd/pii/S1097276510003667?token=EB605C1A491037738AFFA53843A087D06F83E897B9D534ACF84F30AAC2FDC25A8447DCF9ADA1E016AB8105B69BA43AF9)  
1107 [AFFA53843A087D06F83E897B9D534ACF84F30AAC2FDC25A8447DCF9ADA1E016A](https://reader.elsevier.com/reader/sd/pii/S1097276510003667?token=EB605C1A491037738AFFA53843A087D06F83E897B9D534ACF84F30AAC2FDC25A8447DCF9ADA1E016AB8105B69BA43AF9)  
1108 [B8105B69BA43AF9](https://reader.elsevier.com/reader/sd/pii/S1097276510003667?token=EB605C1A491037738AFFA53843A087D06F83E897B9D534ACF84F30AAC2FDC25A8447DCF9ADA1E016AB8105B69BA43AF9) doi:10.1016/j.molcel.2010.05.004.
- 1109 85. Robinson, J. T., Thorvaldsdóttir, H., Wenger, A. M., Zehir, A. & Mesirov, J. P. Variant  
1110 Review with the Integrative Genomics Viewer. *Cancer Res* **77**, e31–e34 (2017).
- 1111 86. Ramírez, F. *et al.* deepTools2: a next generation web server for deep-sequencing data  
1112 analysis. *Nucleic Acids Res* **44**, W160–W165 (2016).
- 1113 87. Knudsen, L., Weibel, E. R., Gundersen, H. J. G., Weinstein, F. V. & Ochs, M. Assessment of  
1114 air space size characteristics by intercept (chord) measurement: an accurate and efficient  
1115 stereological approach. *Journal of Applied Physiology* **108**, 412–421 (2010).
- 1116

**Fig. 1**

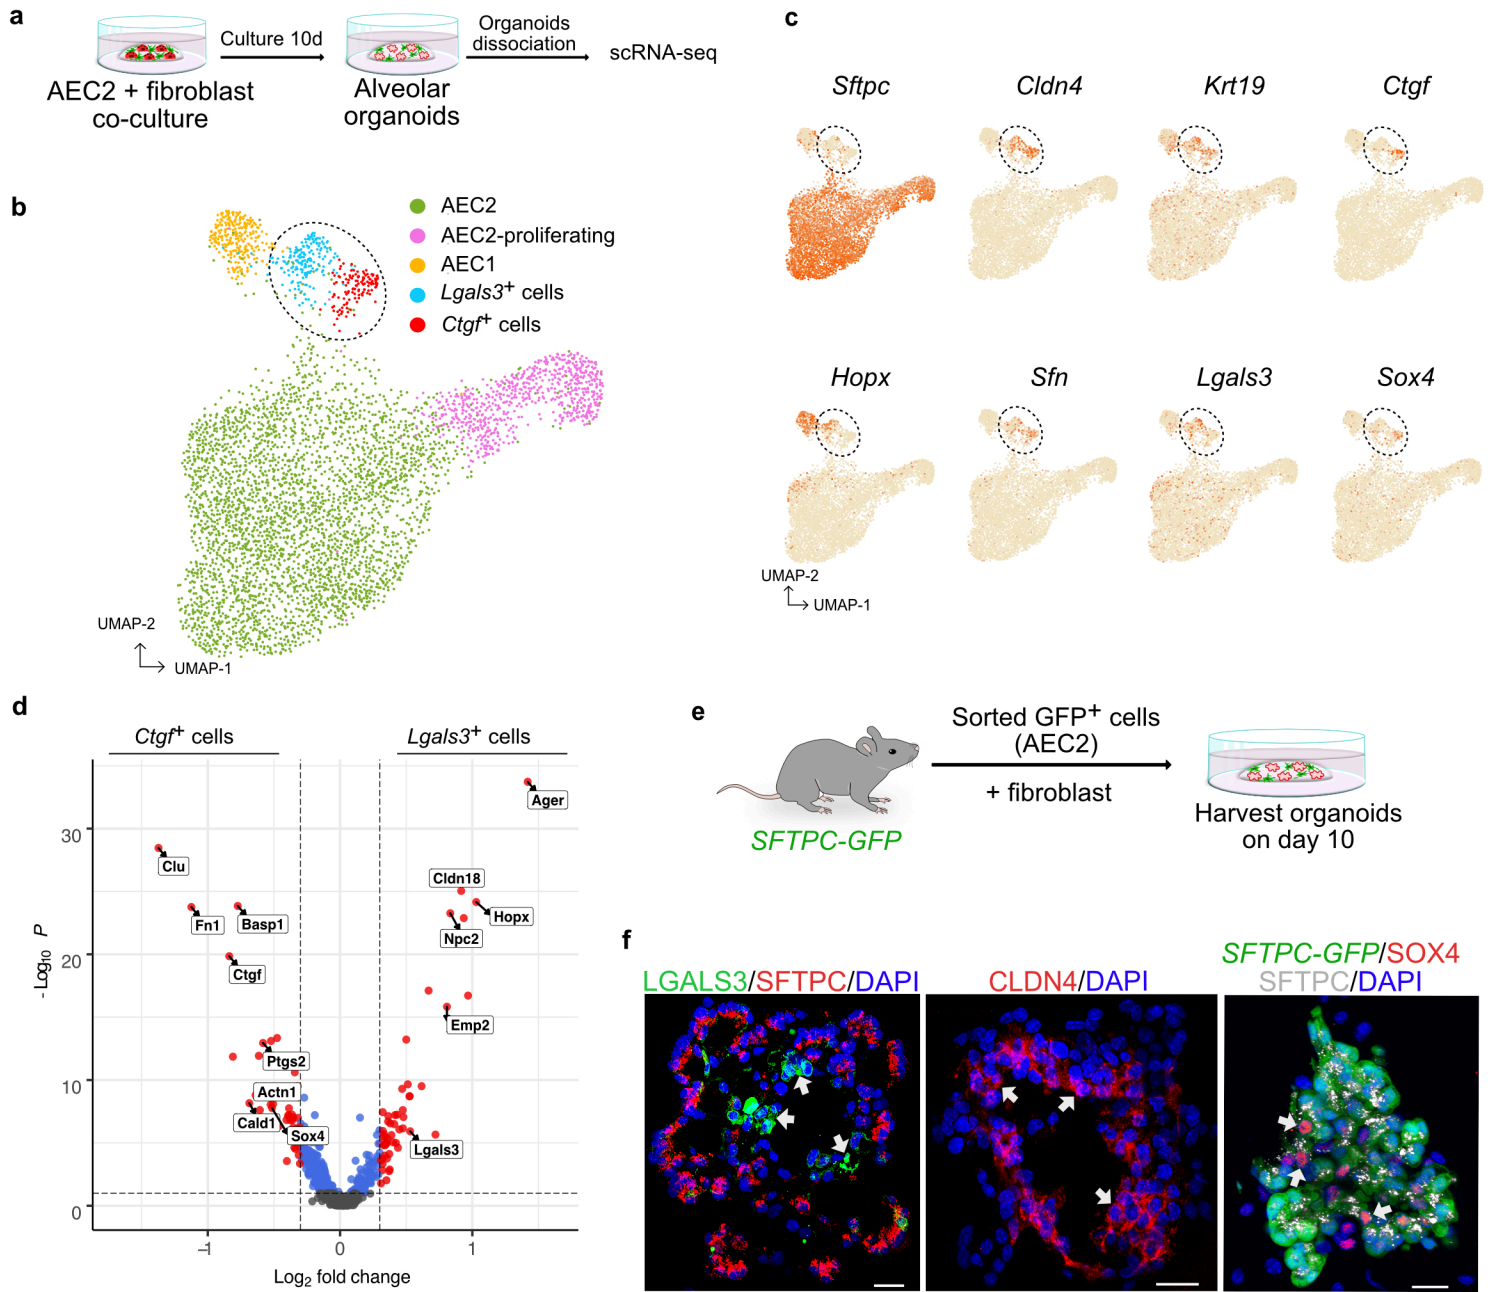

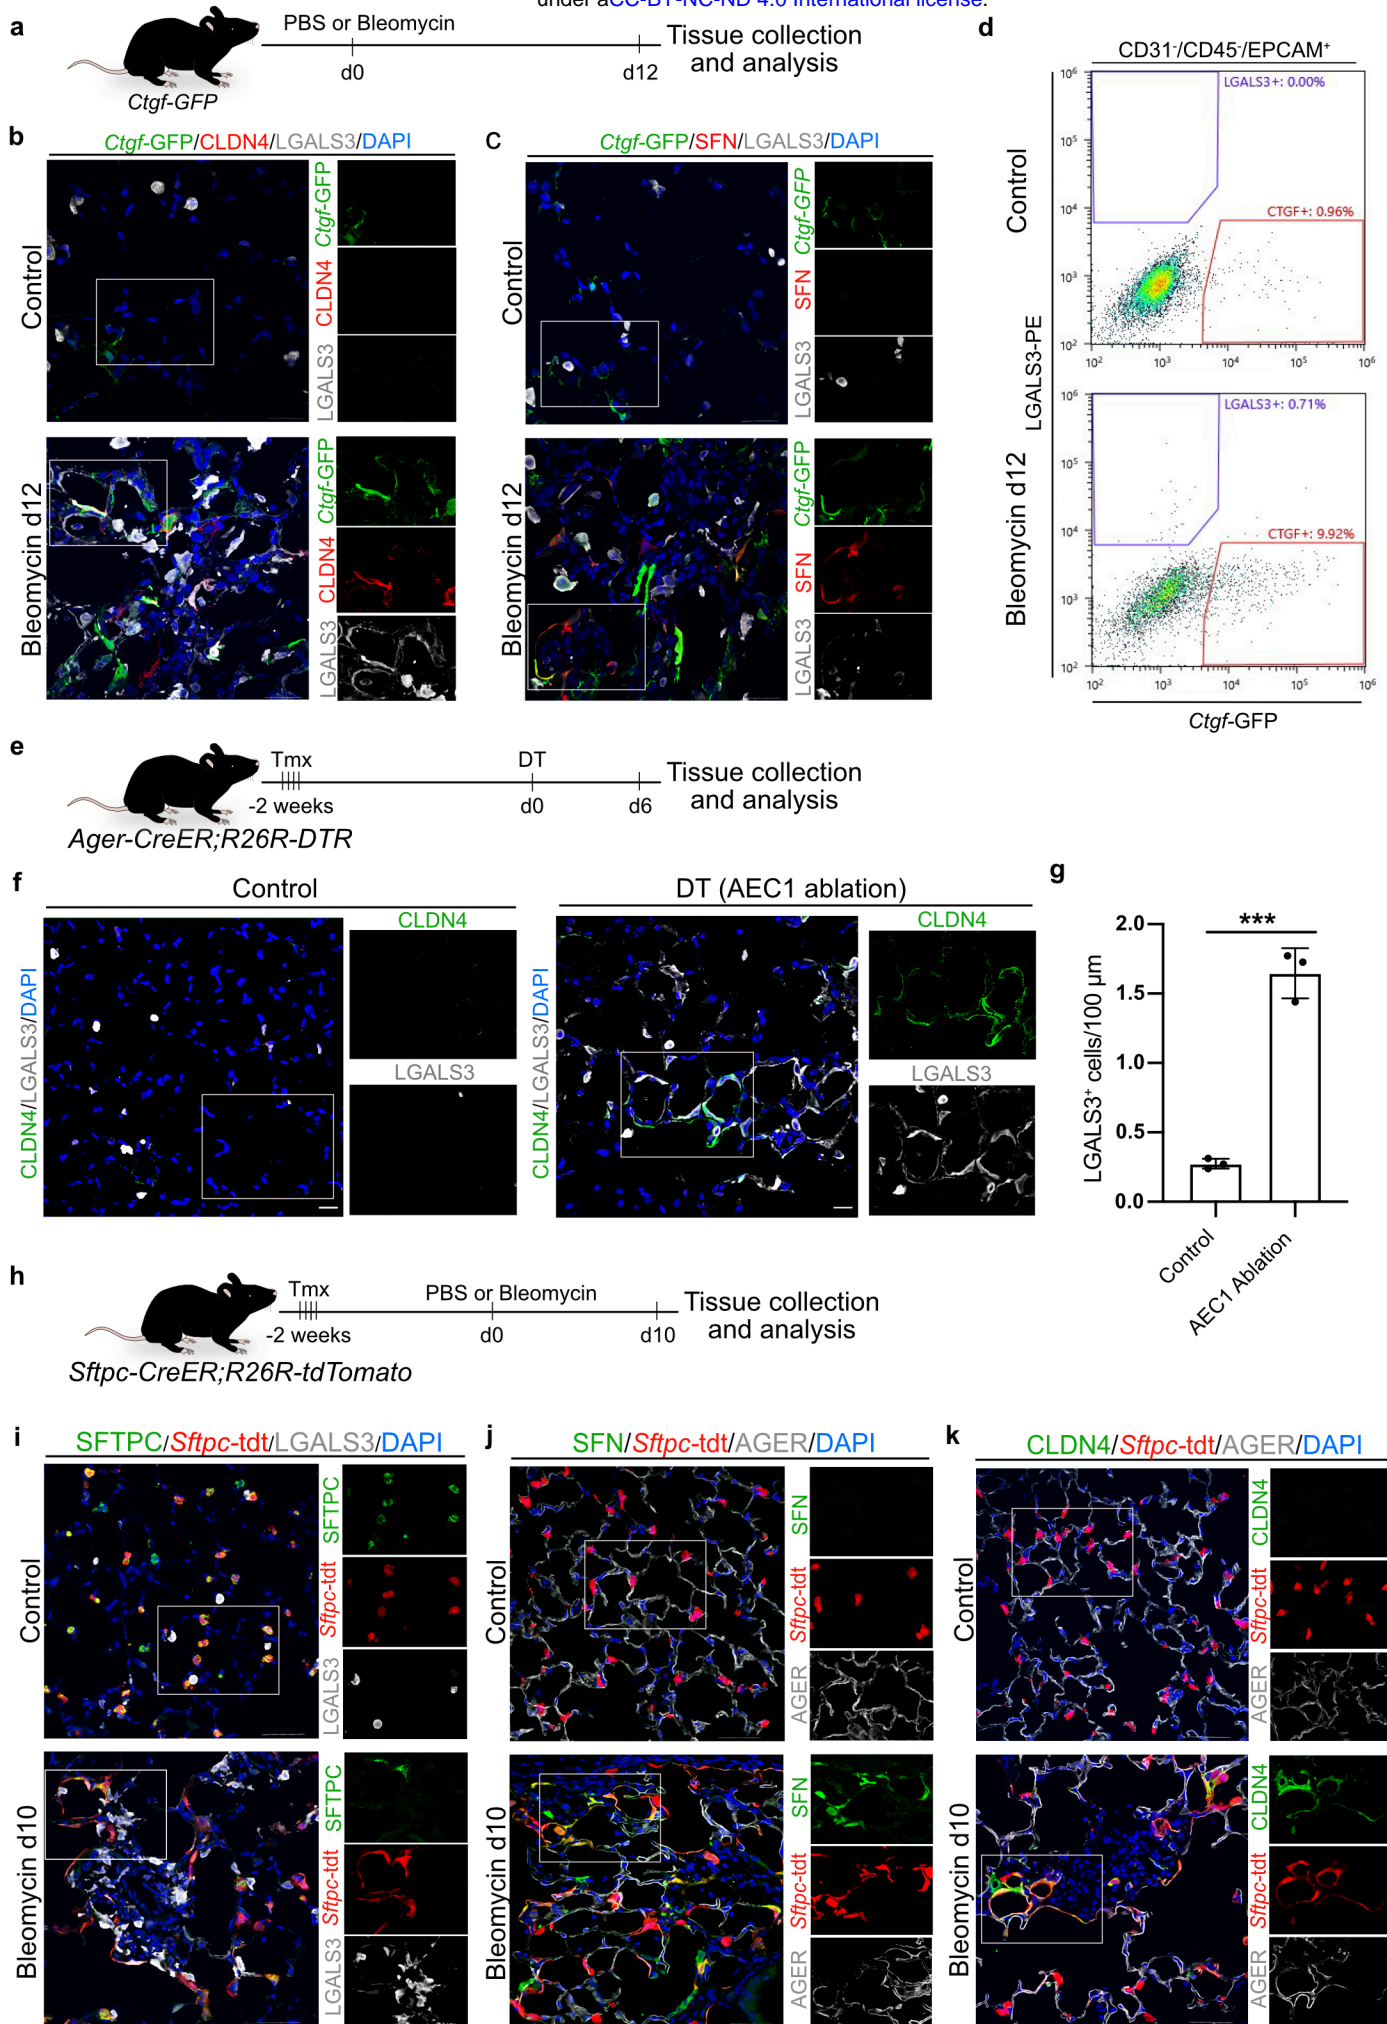

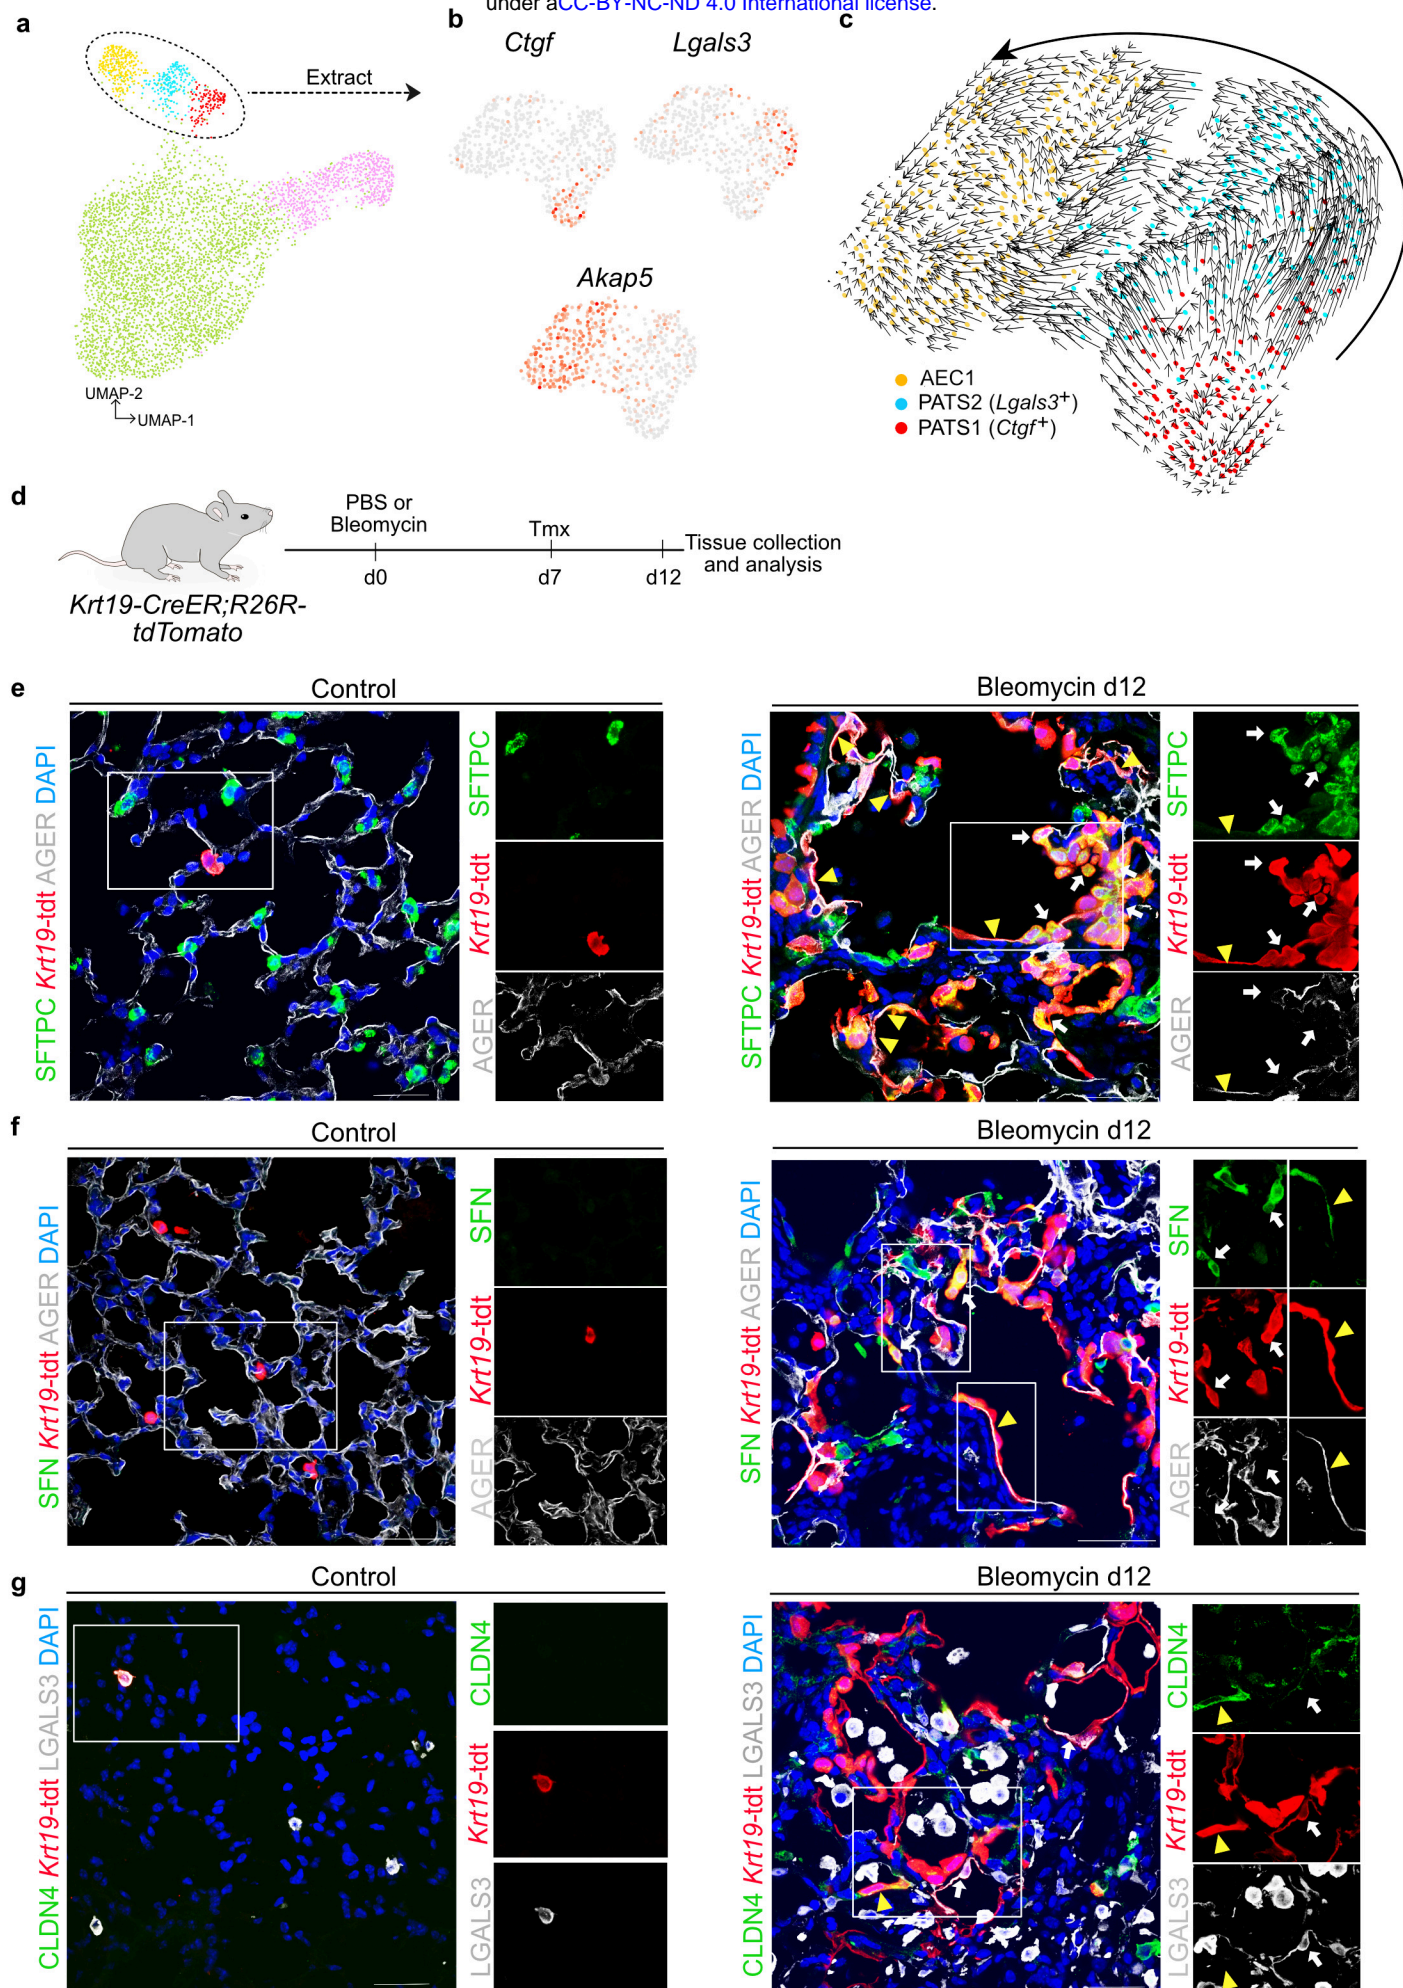

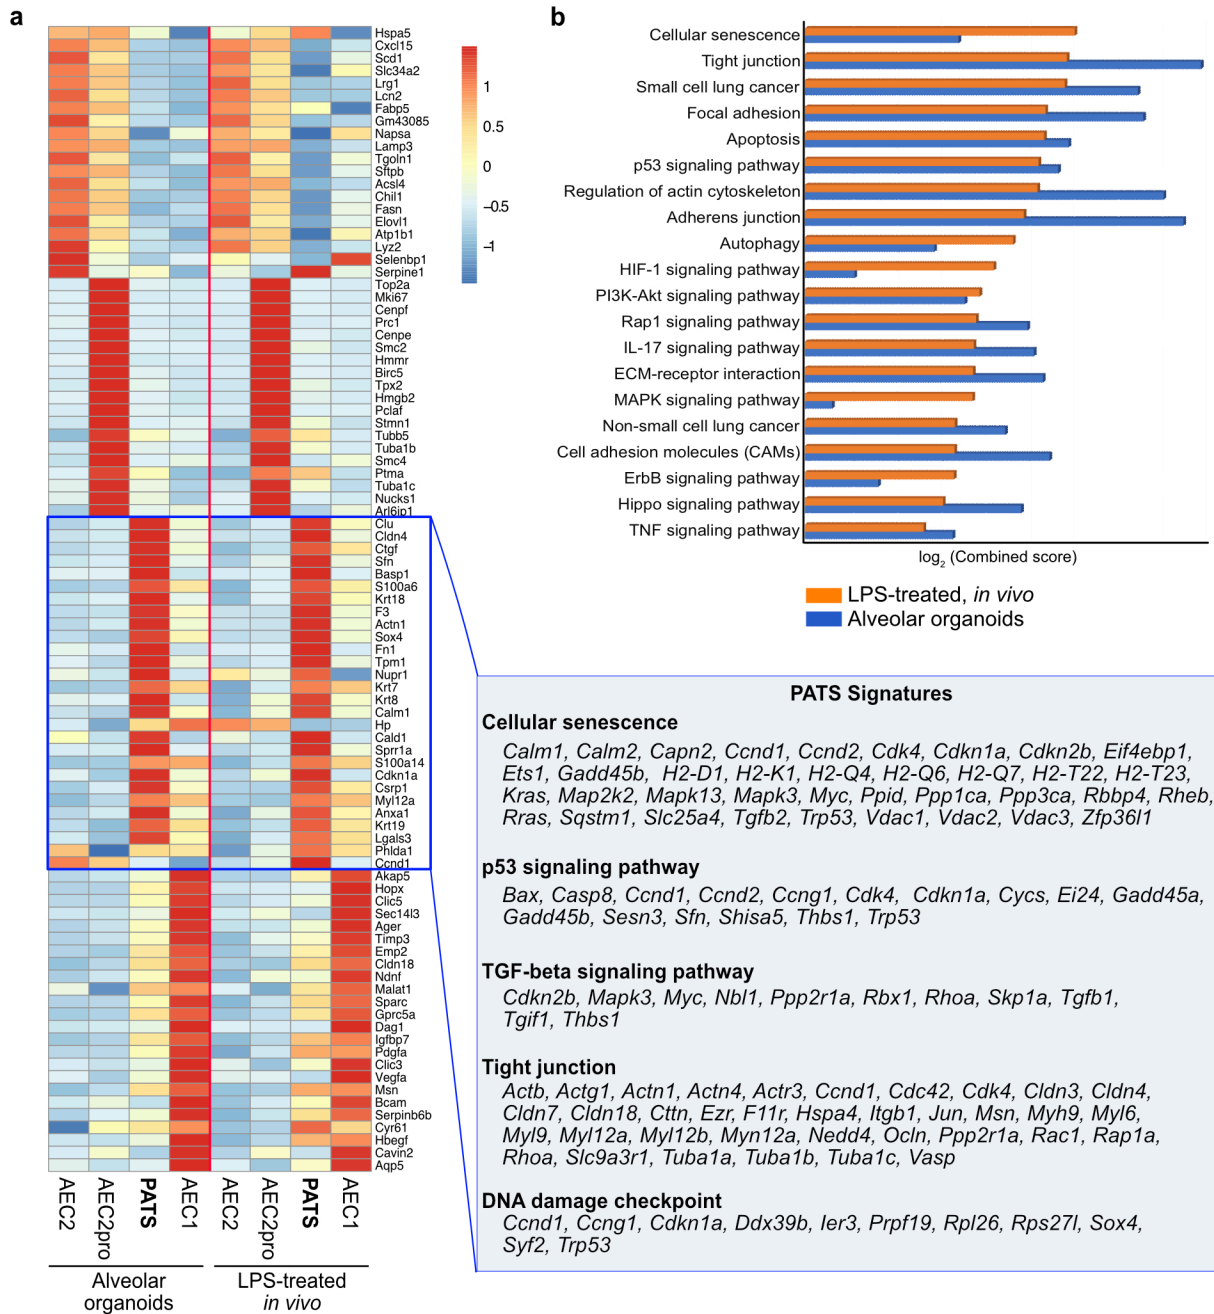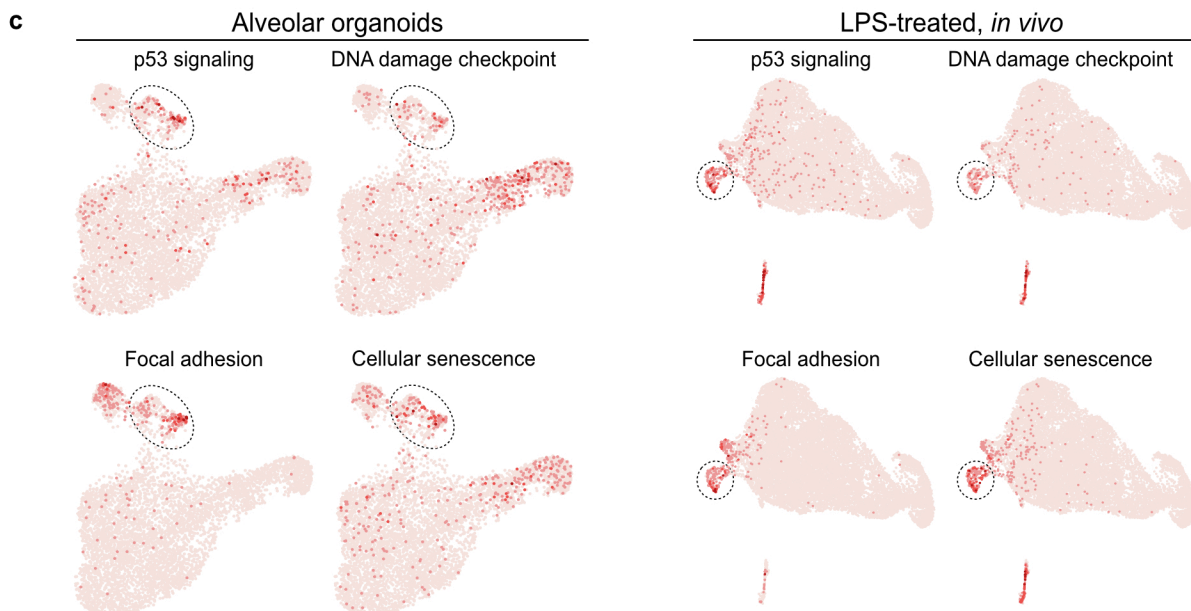

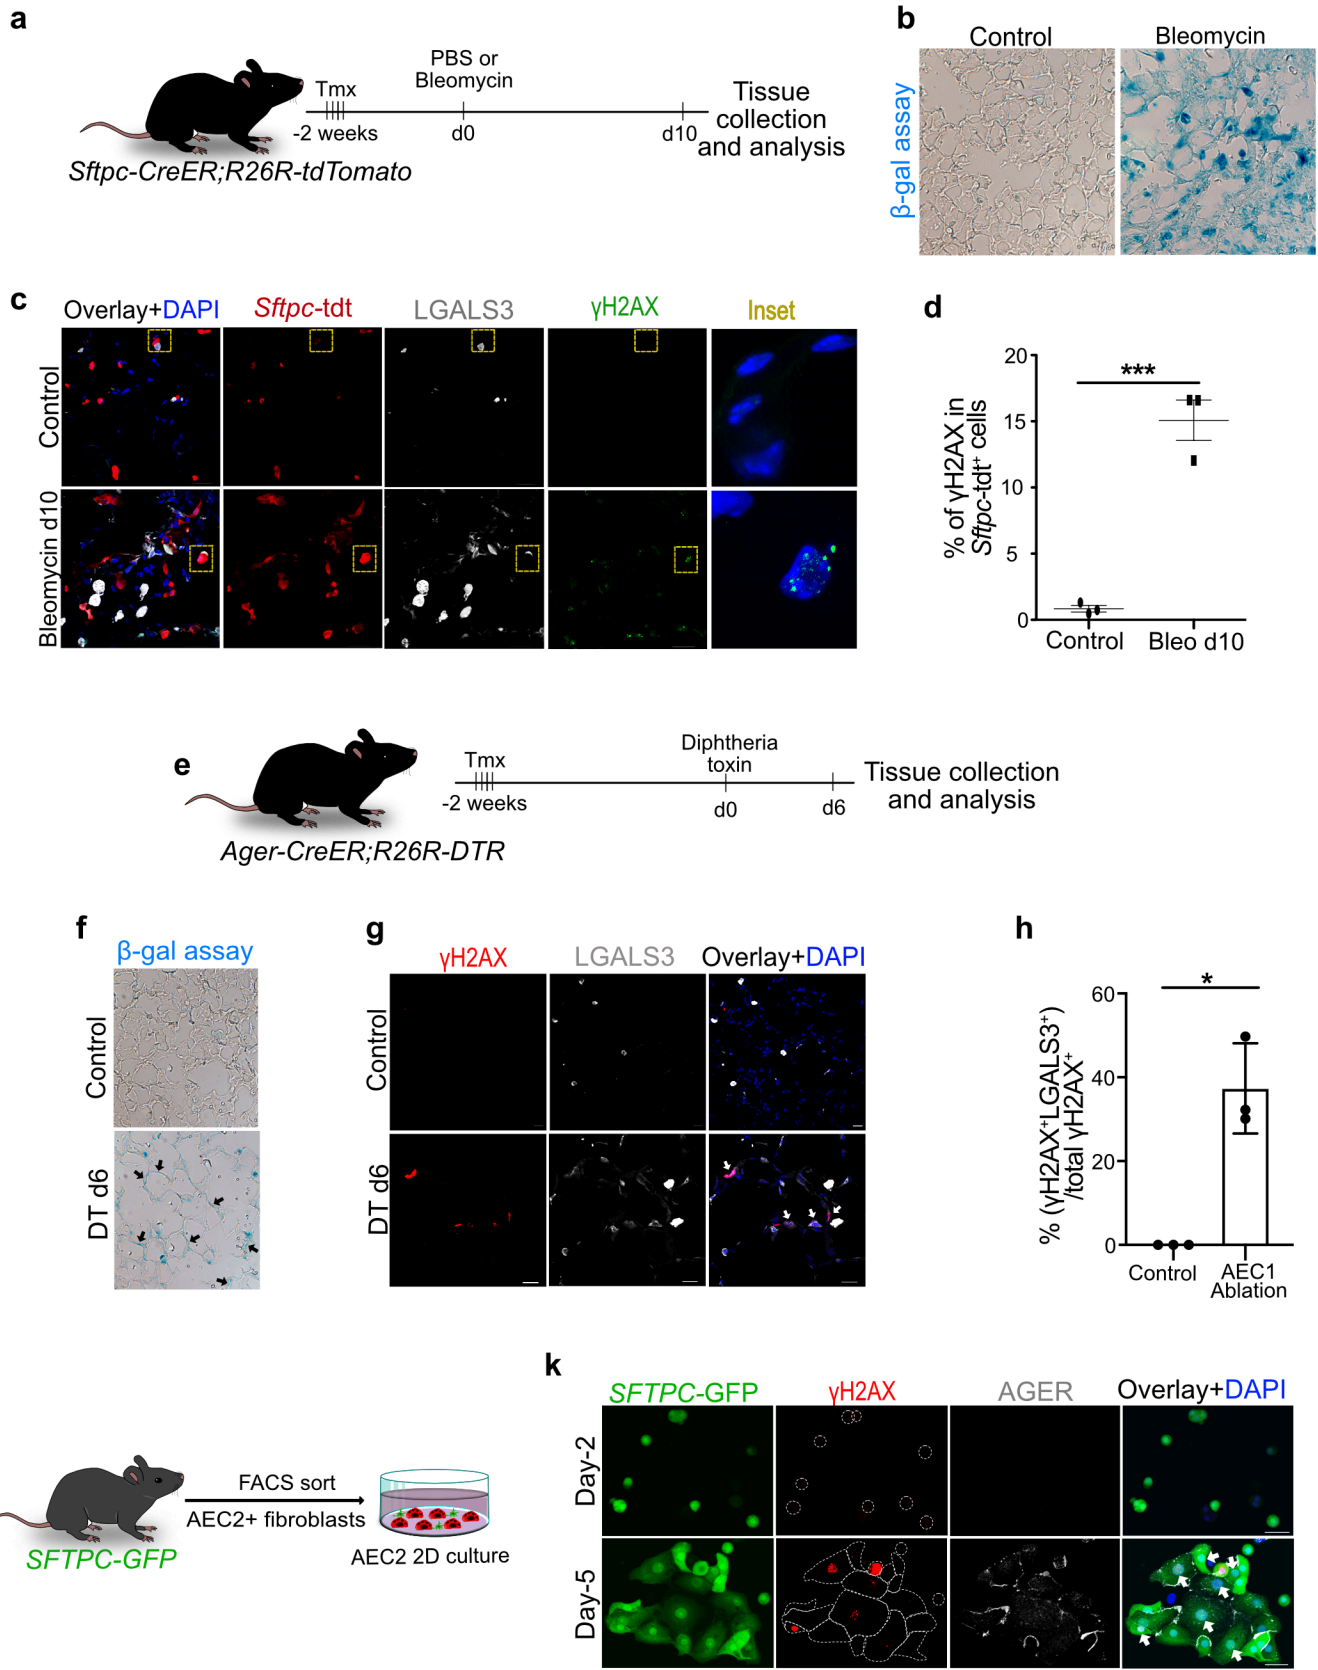

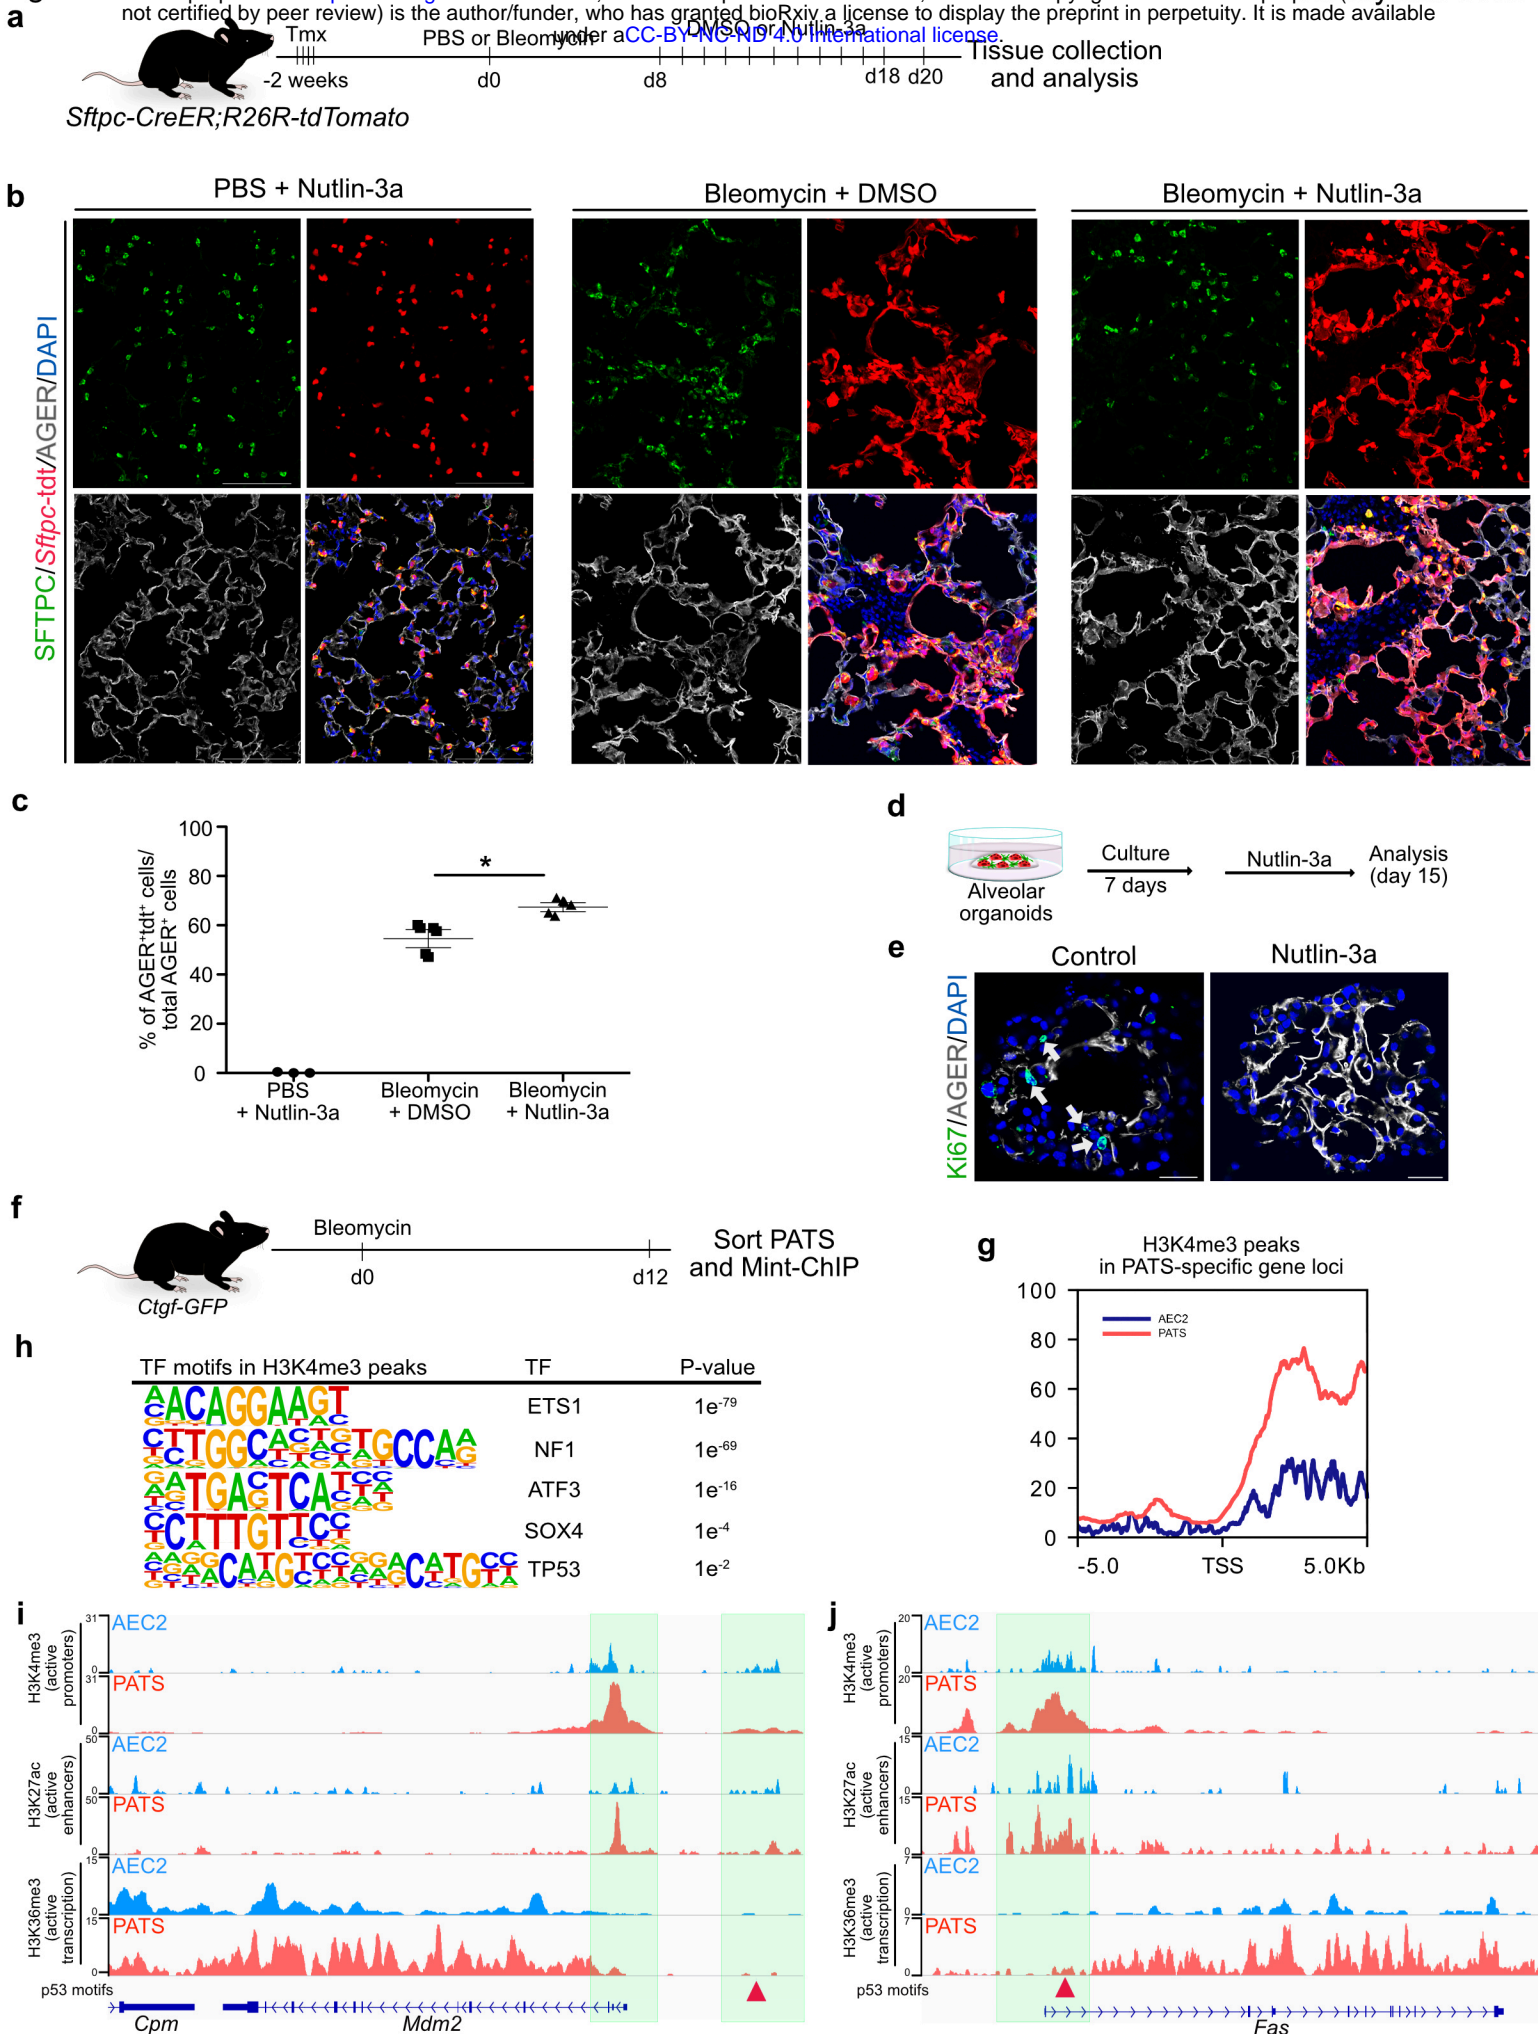

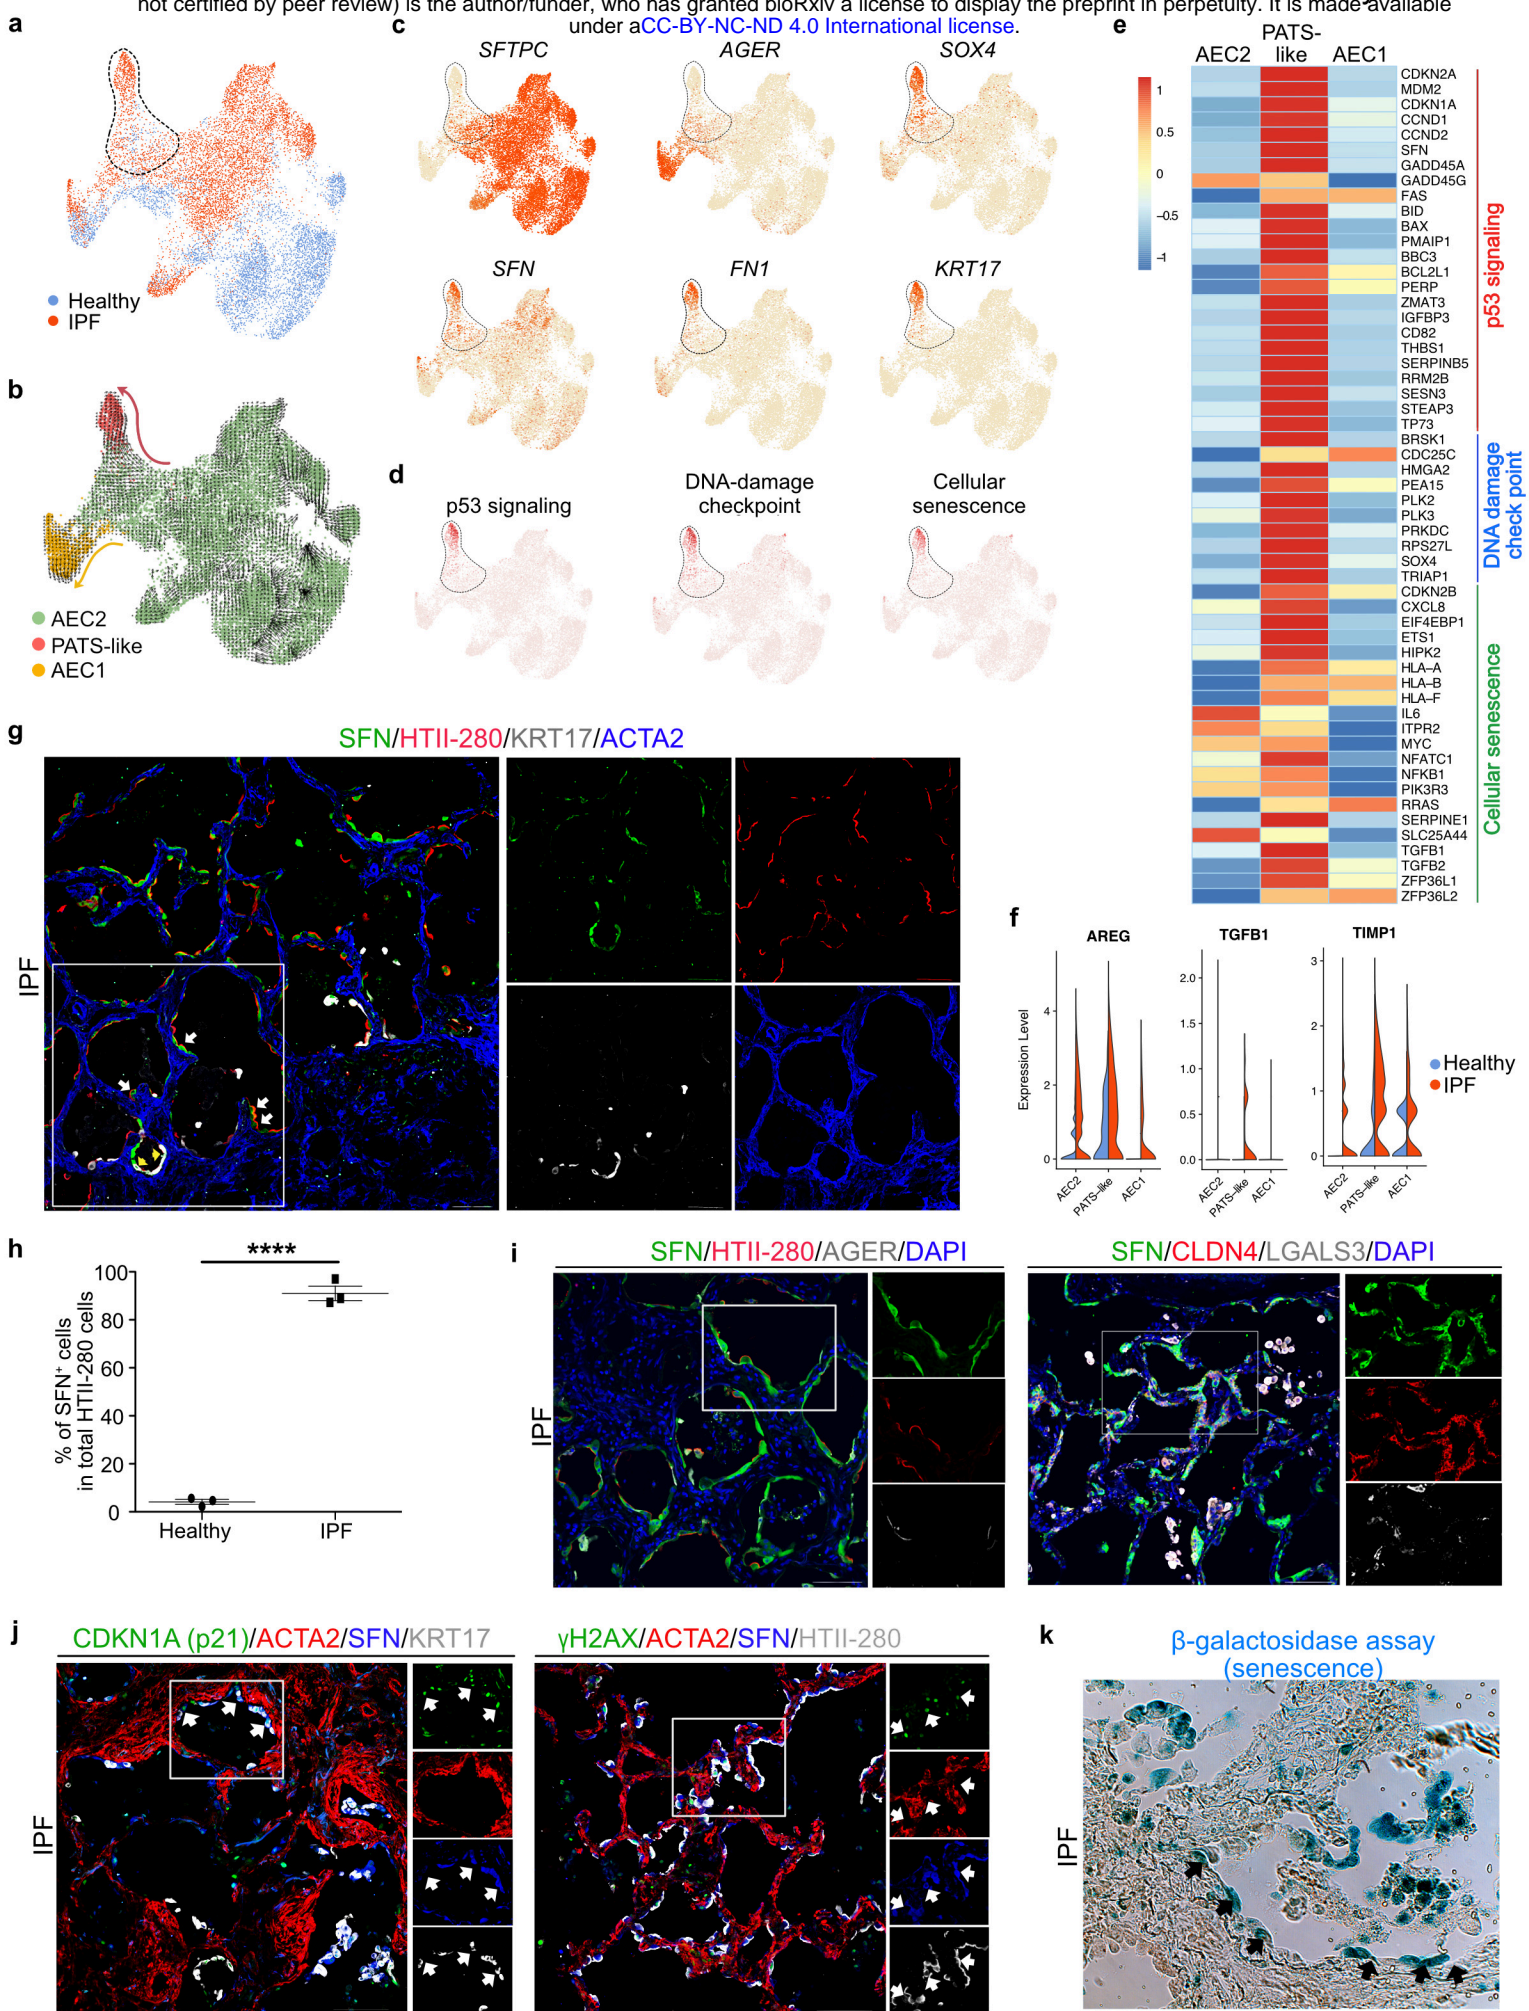



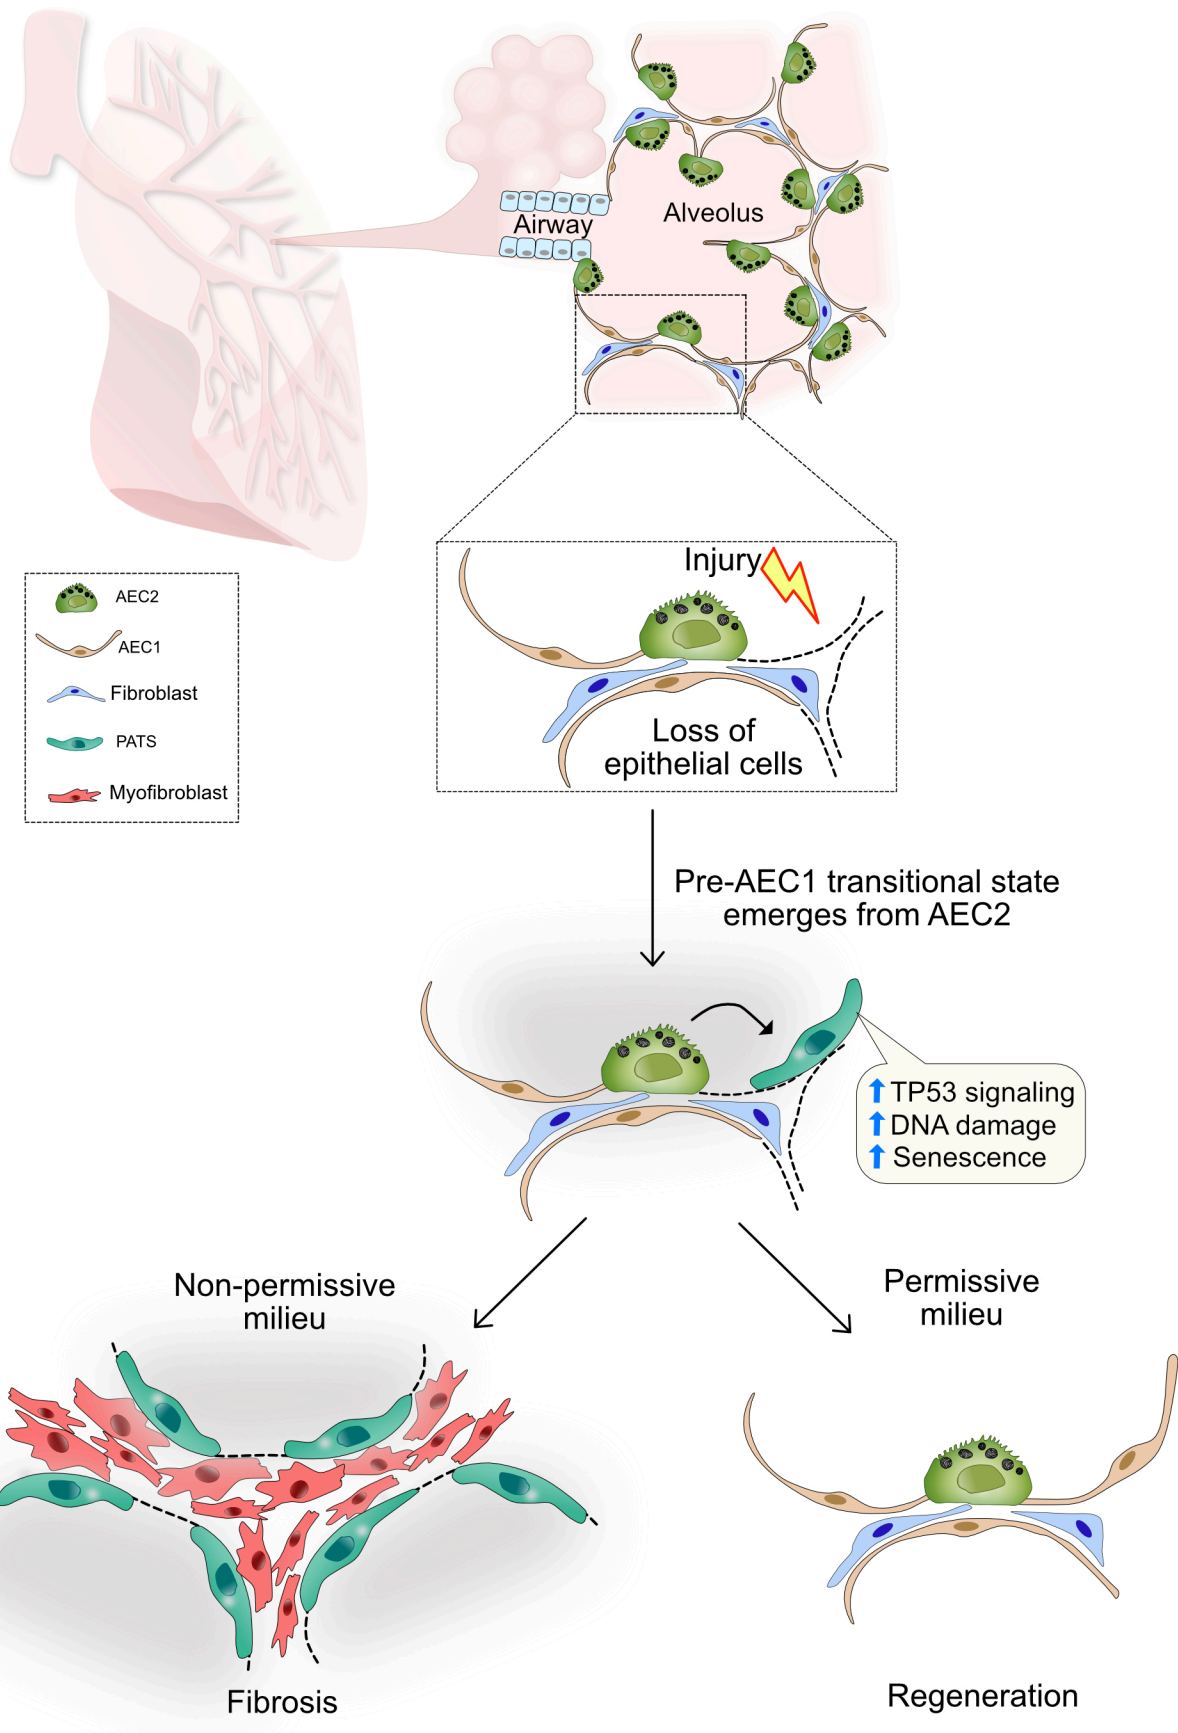

Supplementary Fig. 1

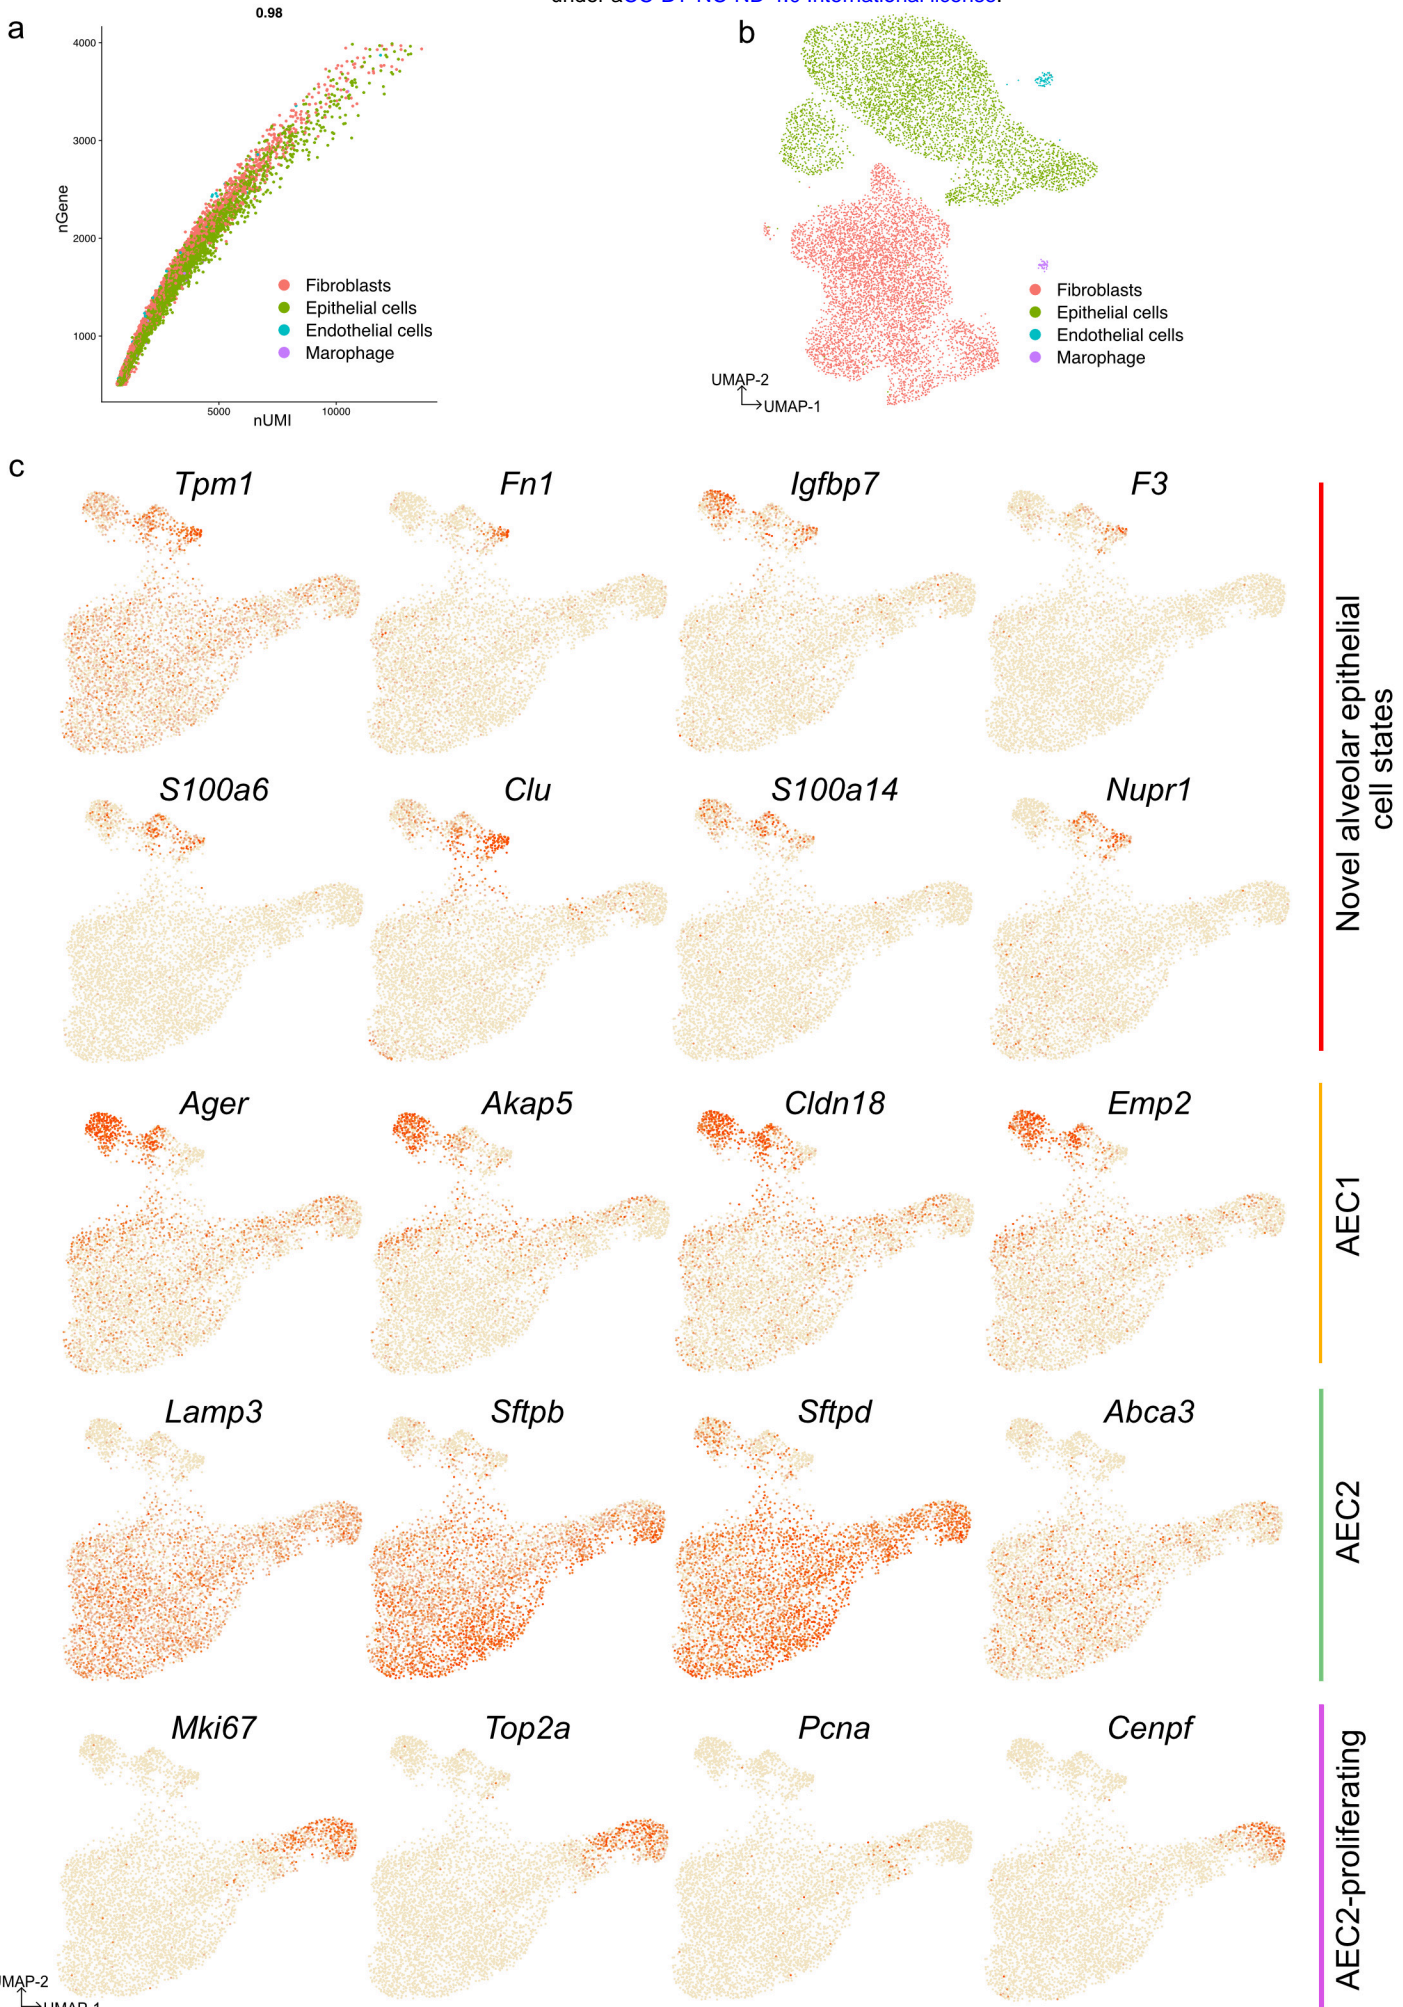

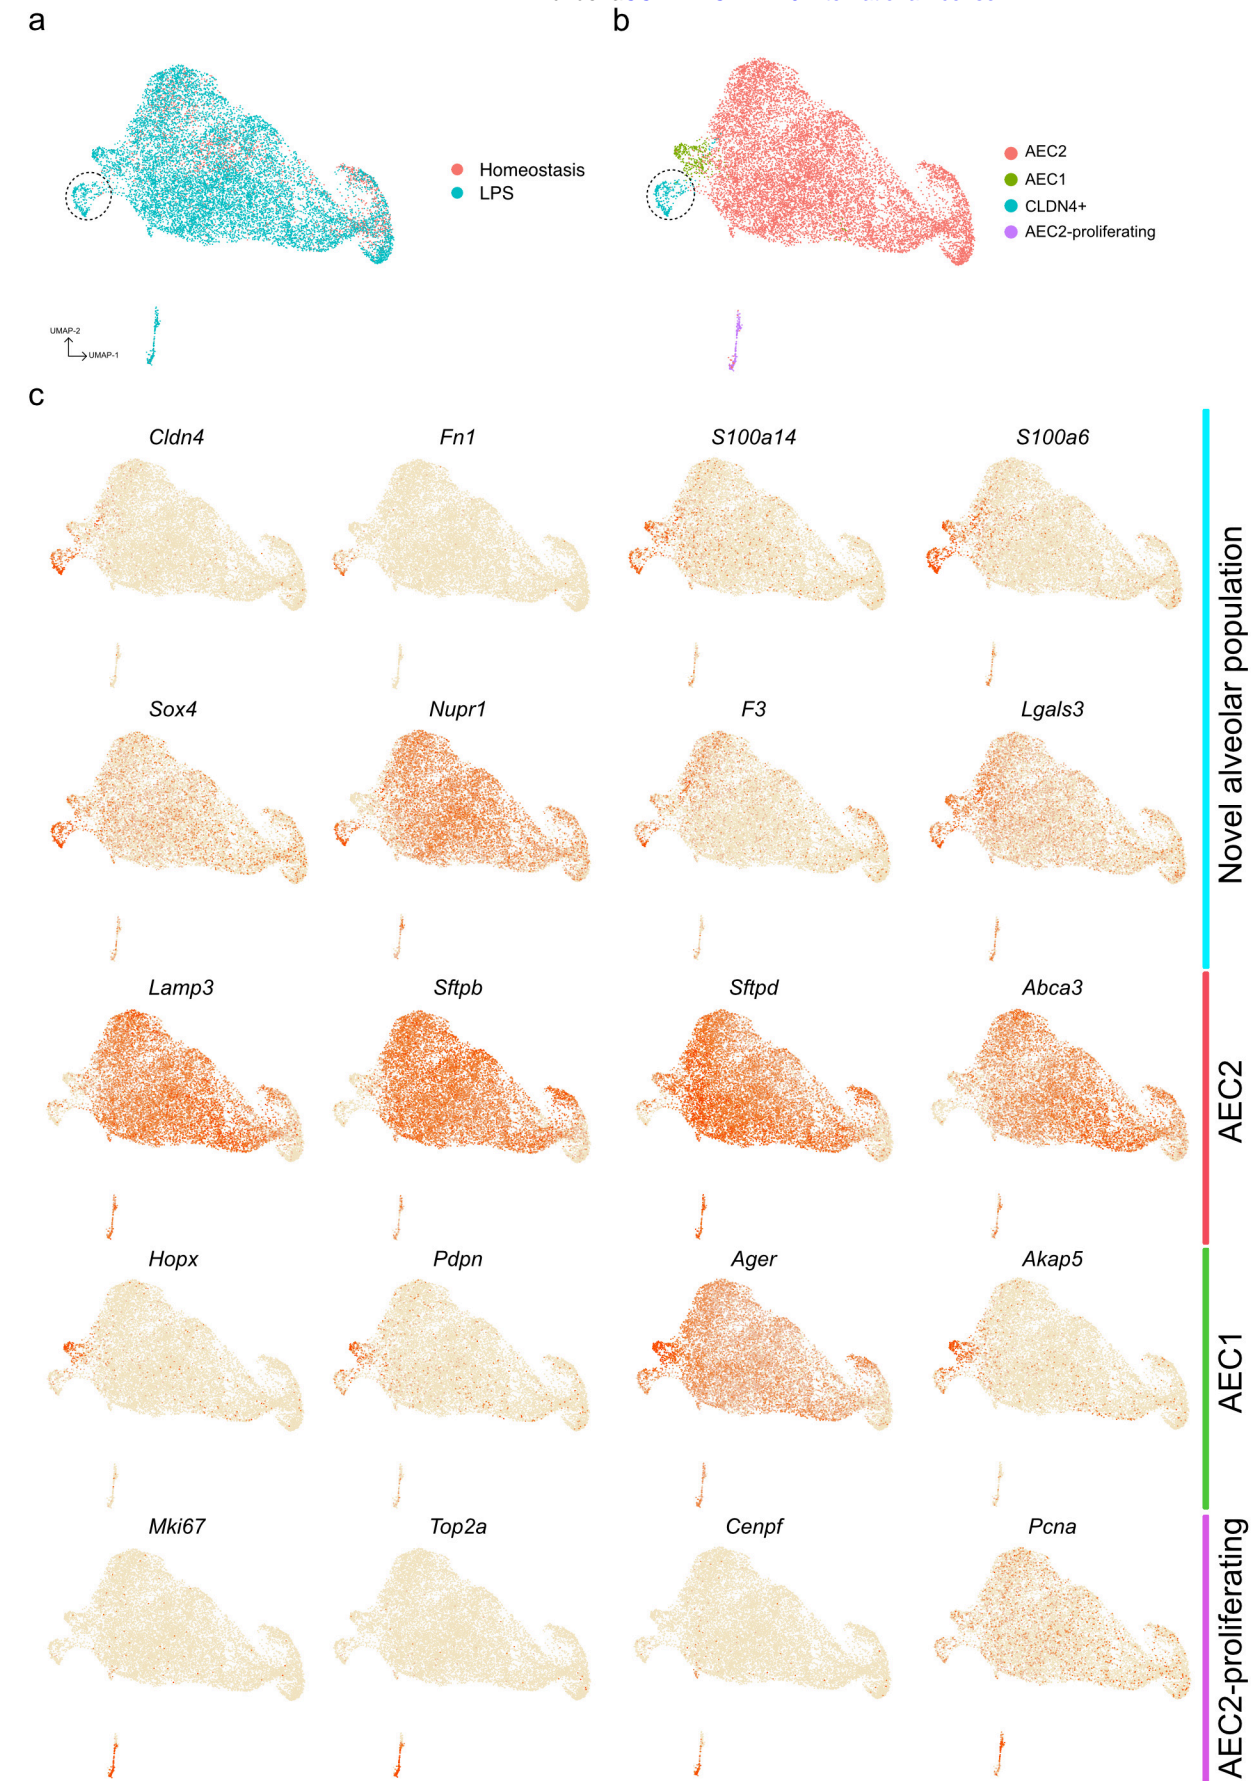

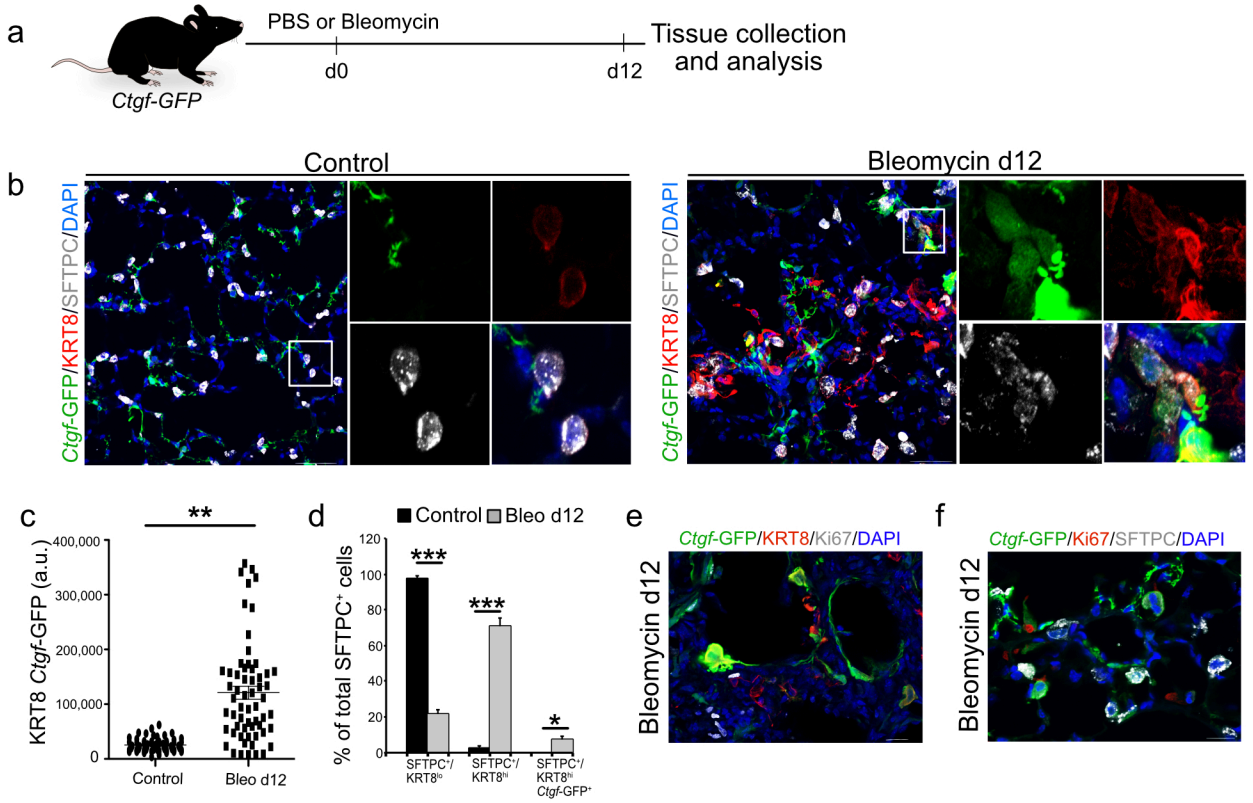

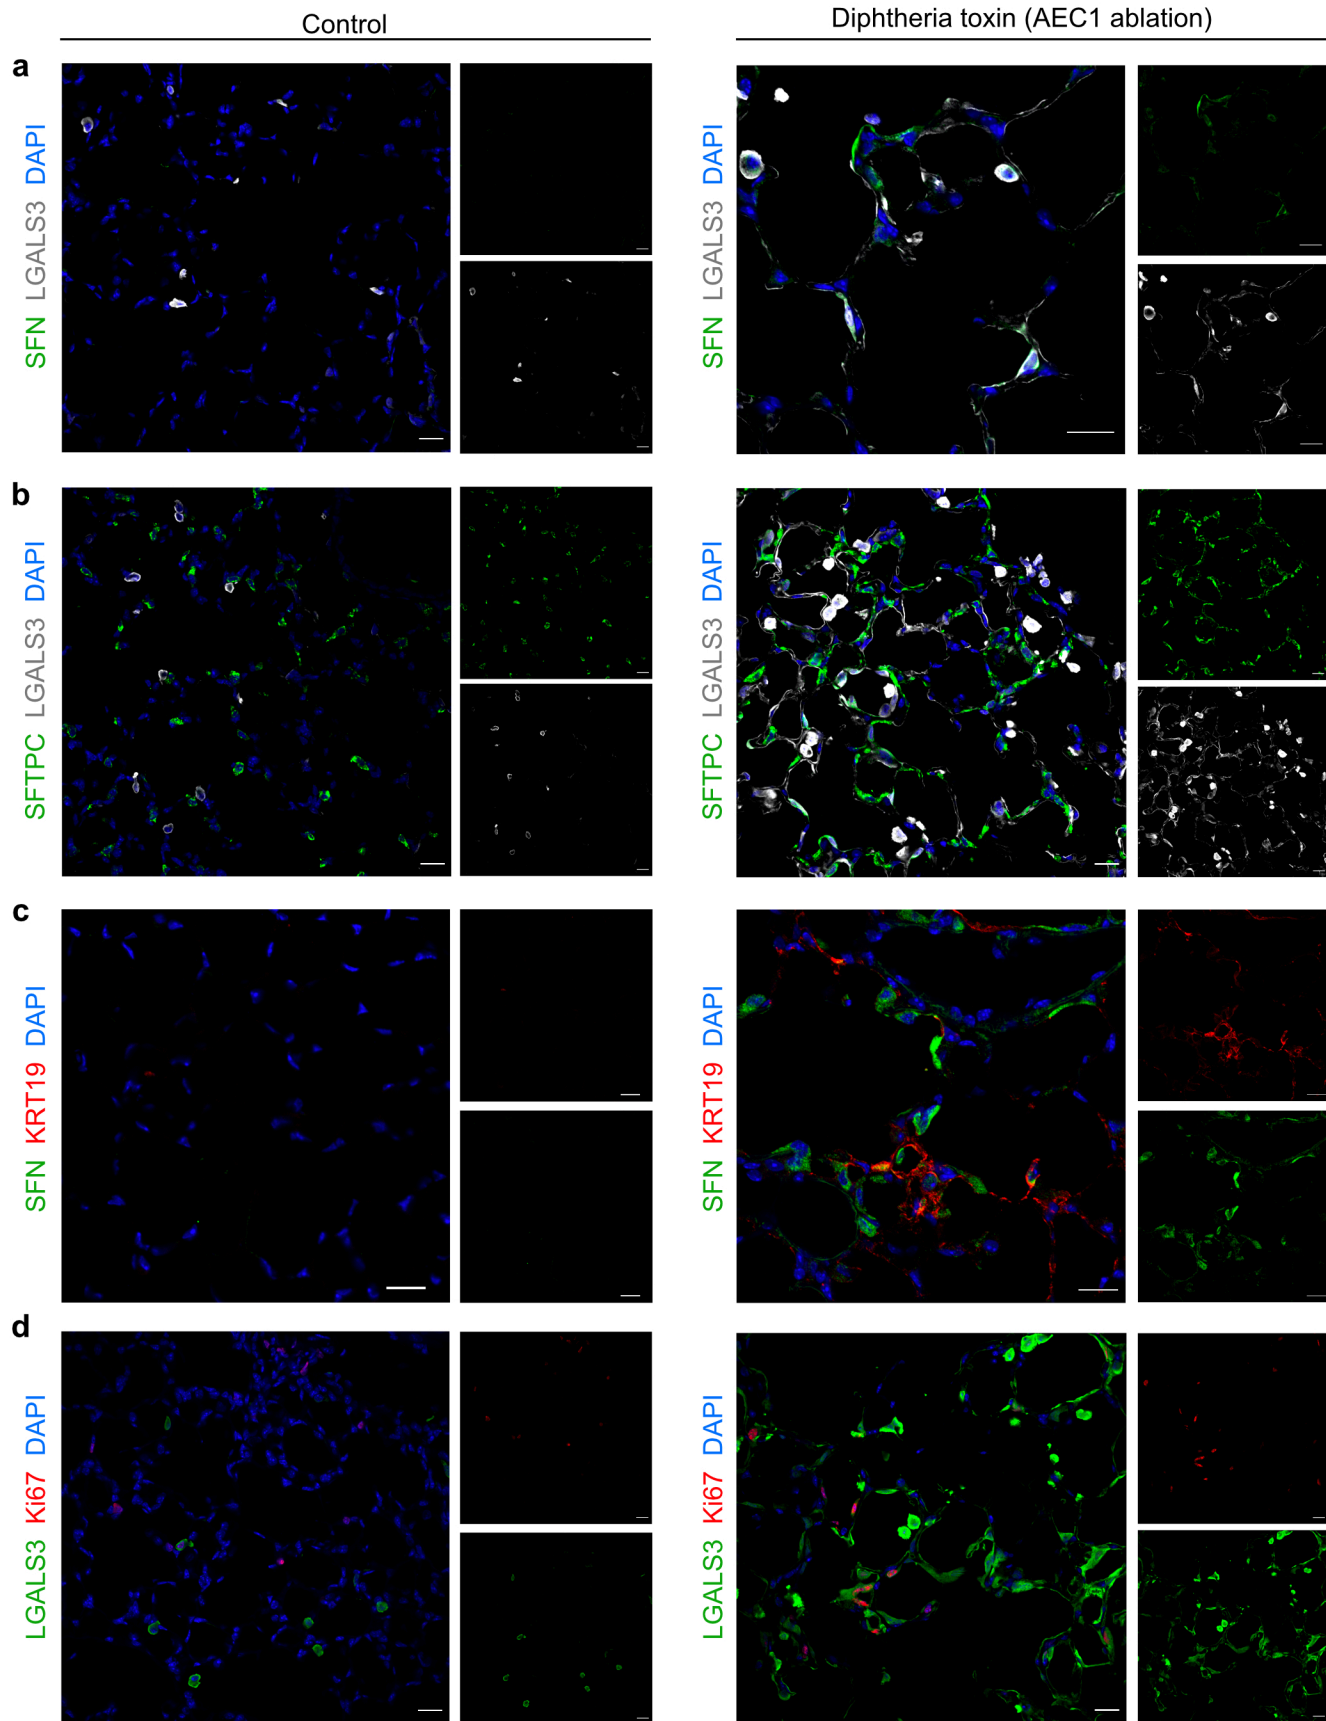

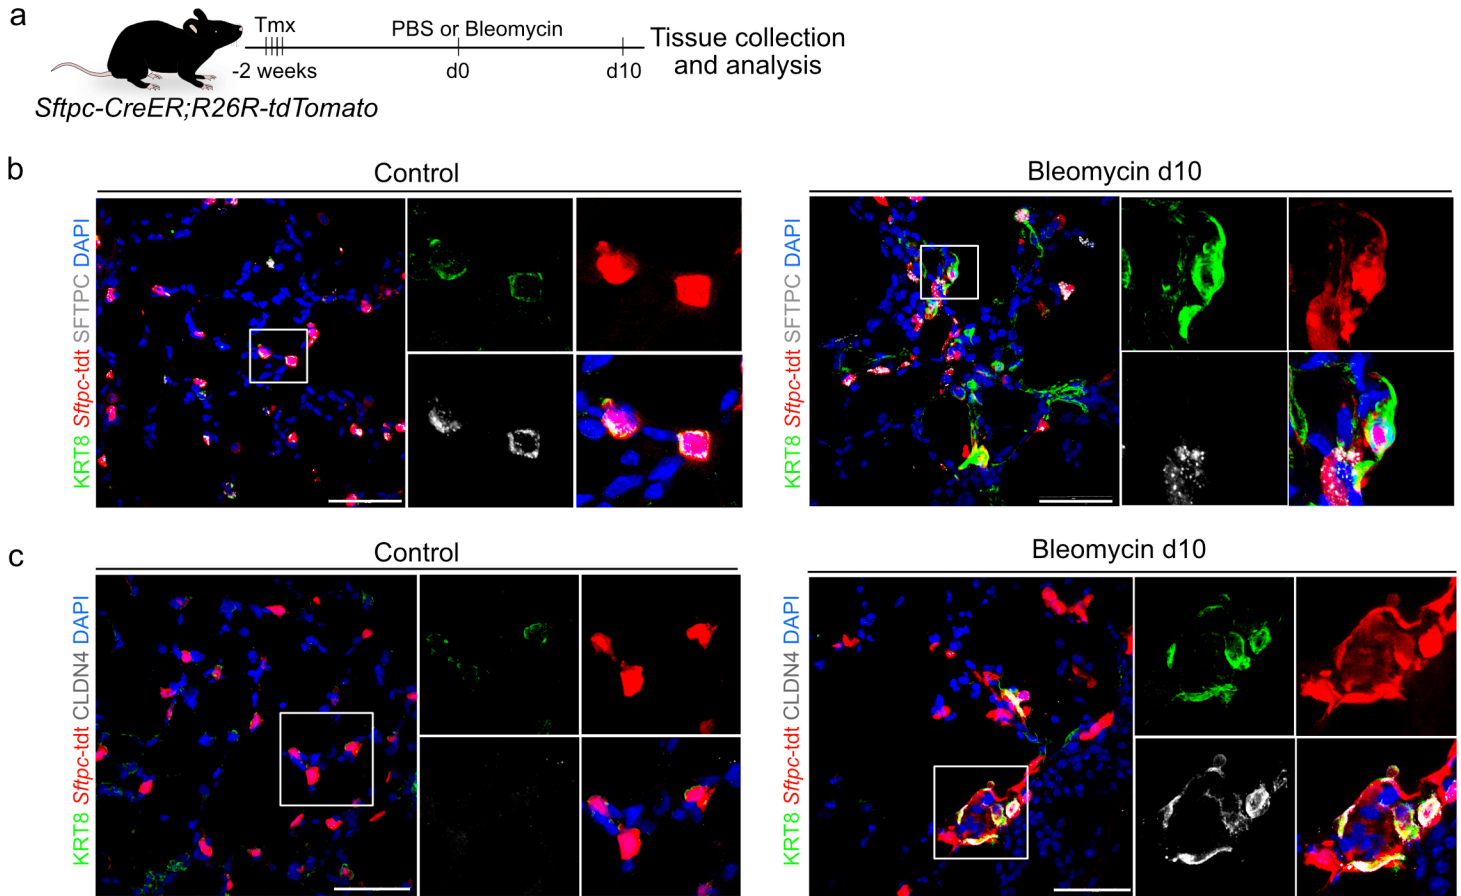

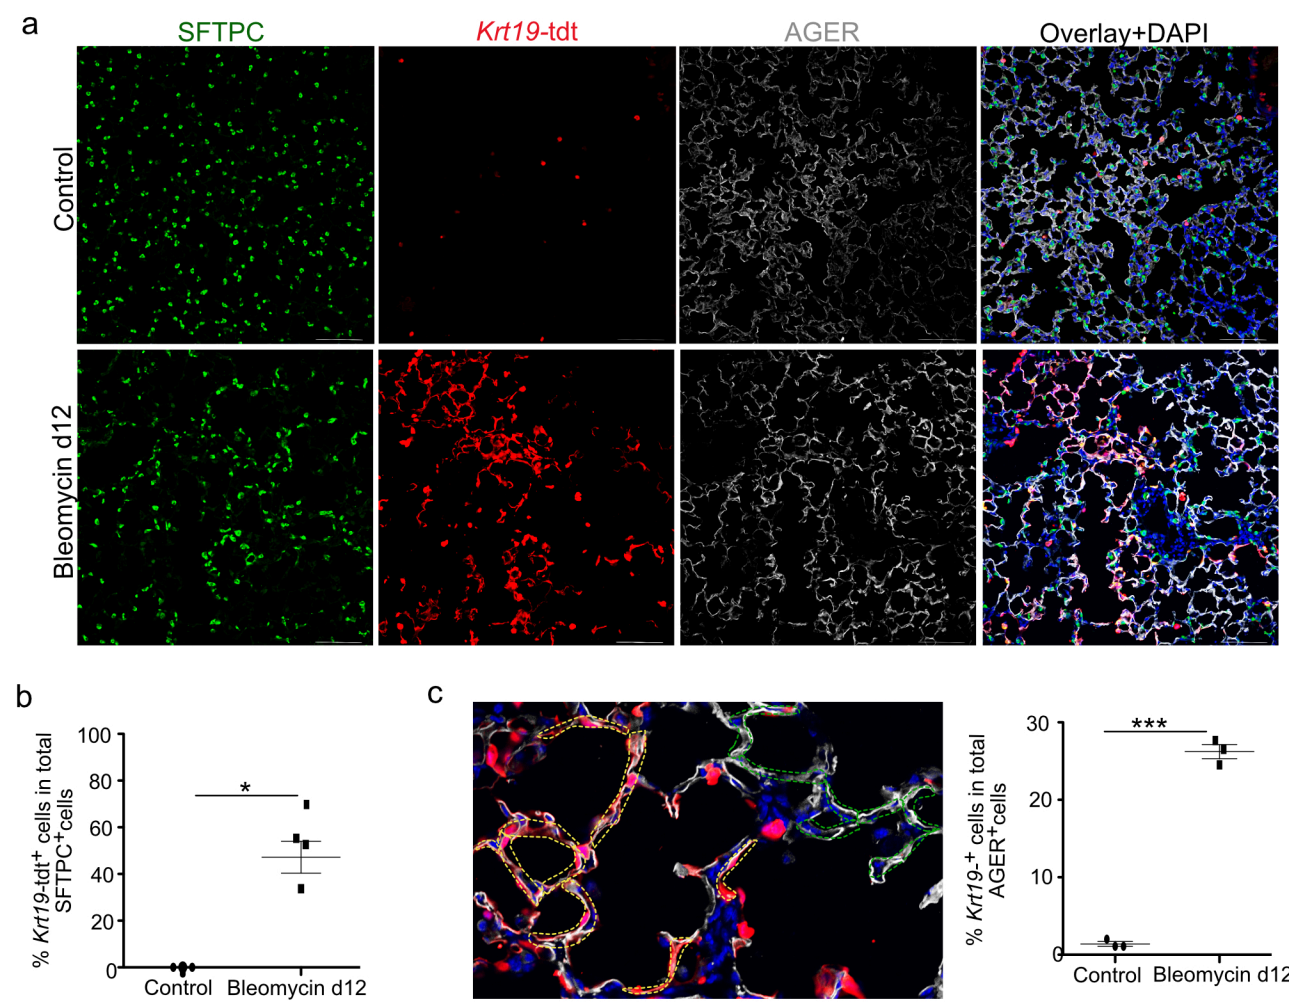

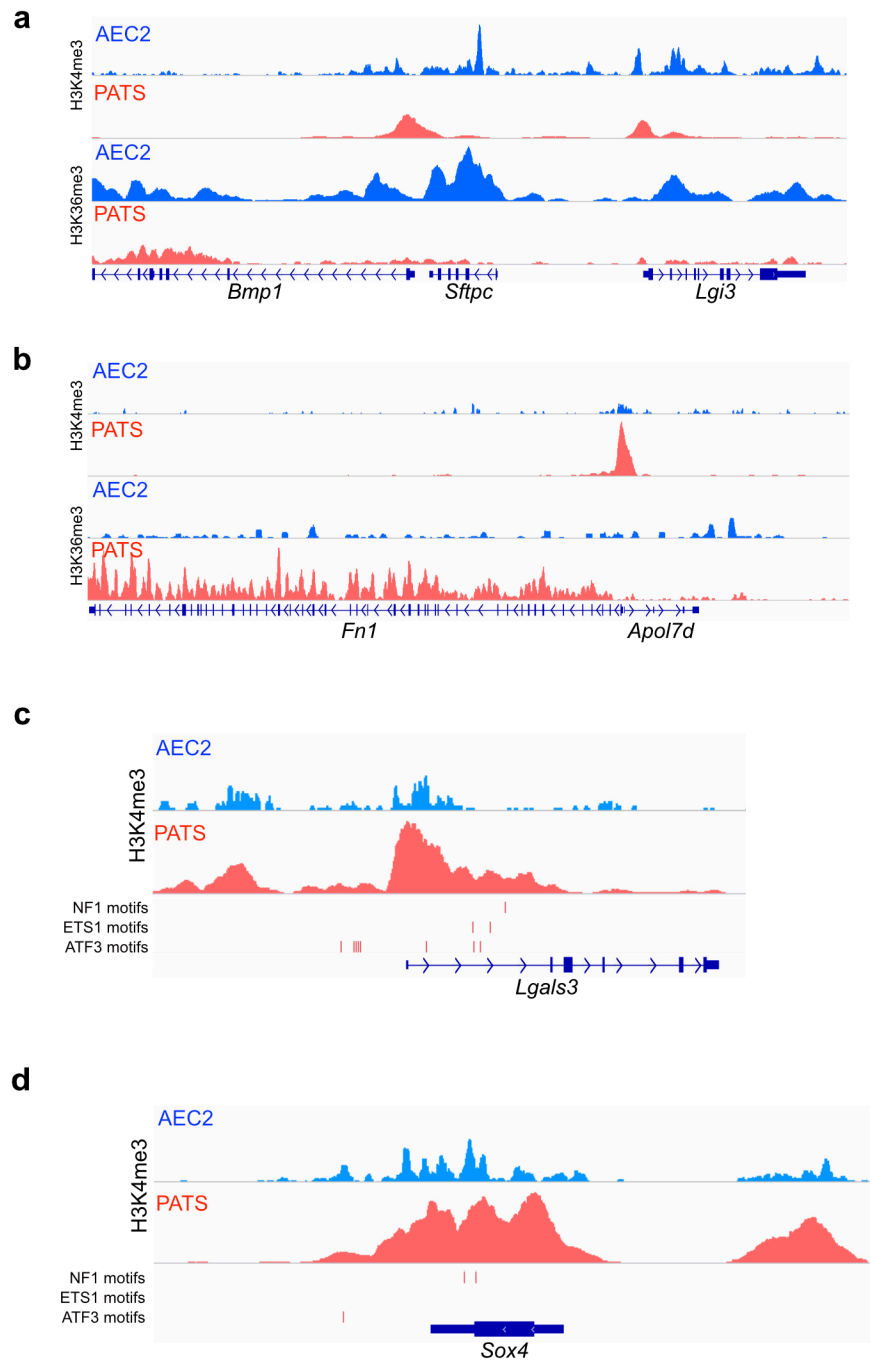



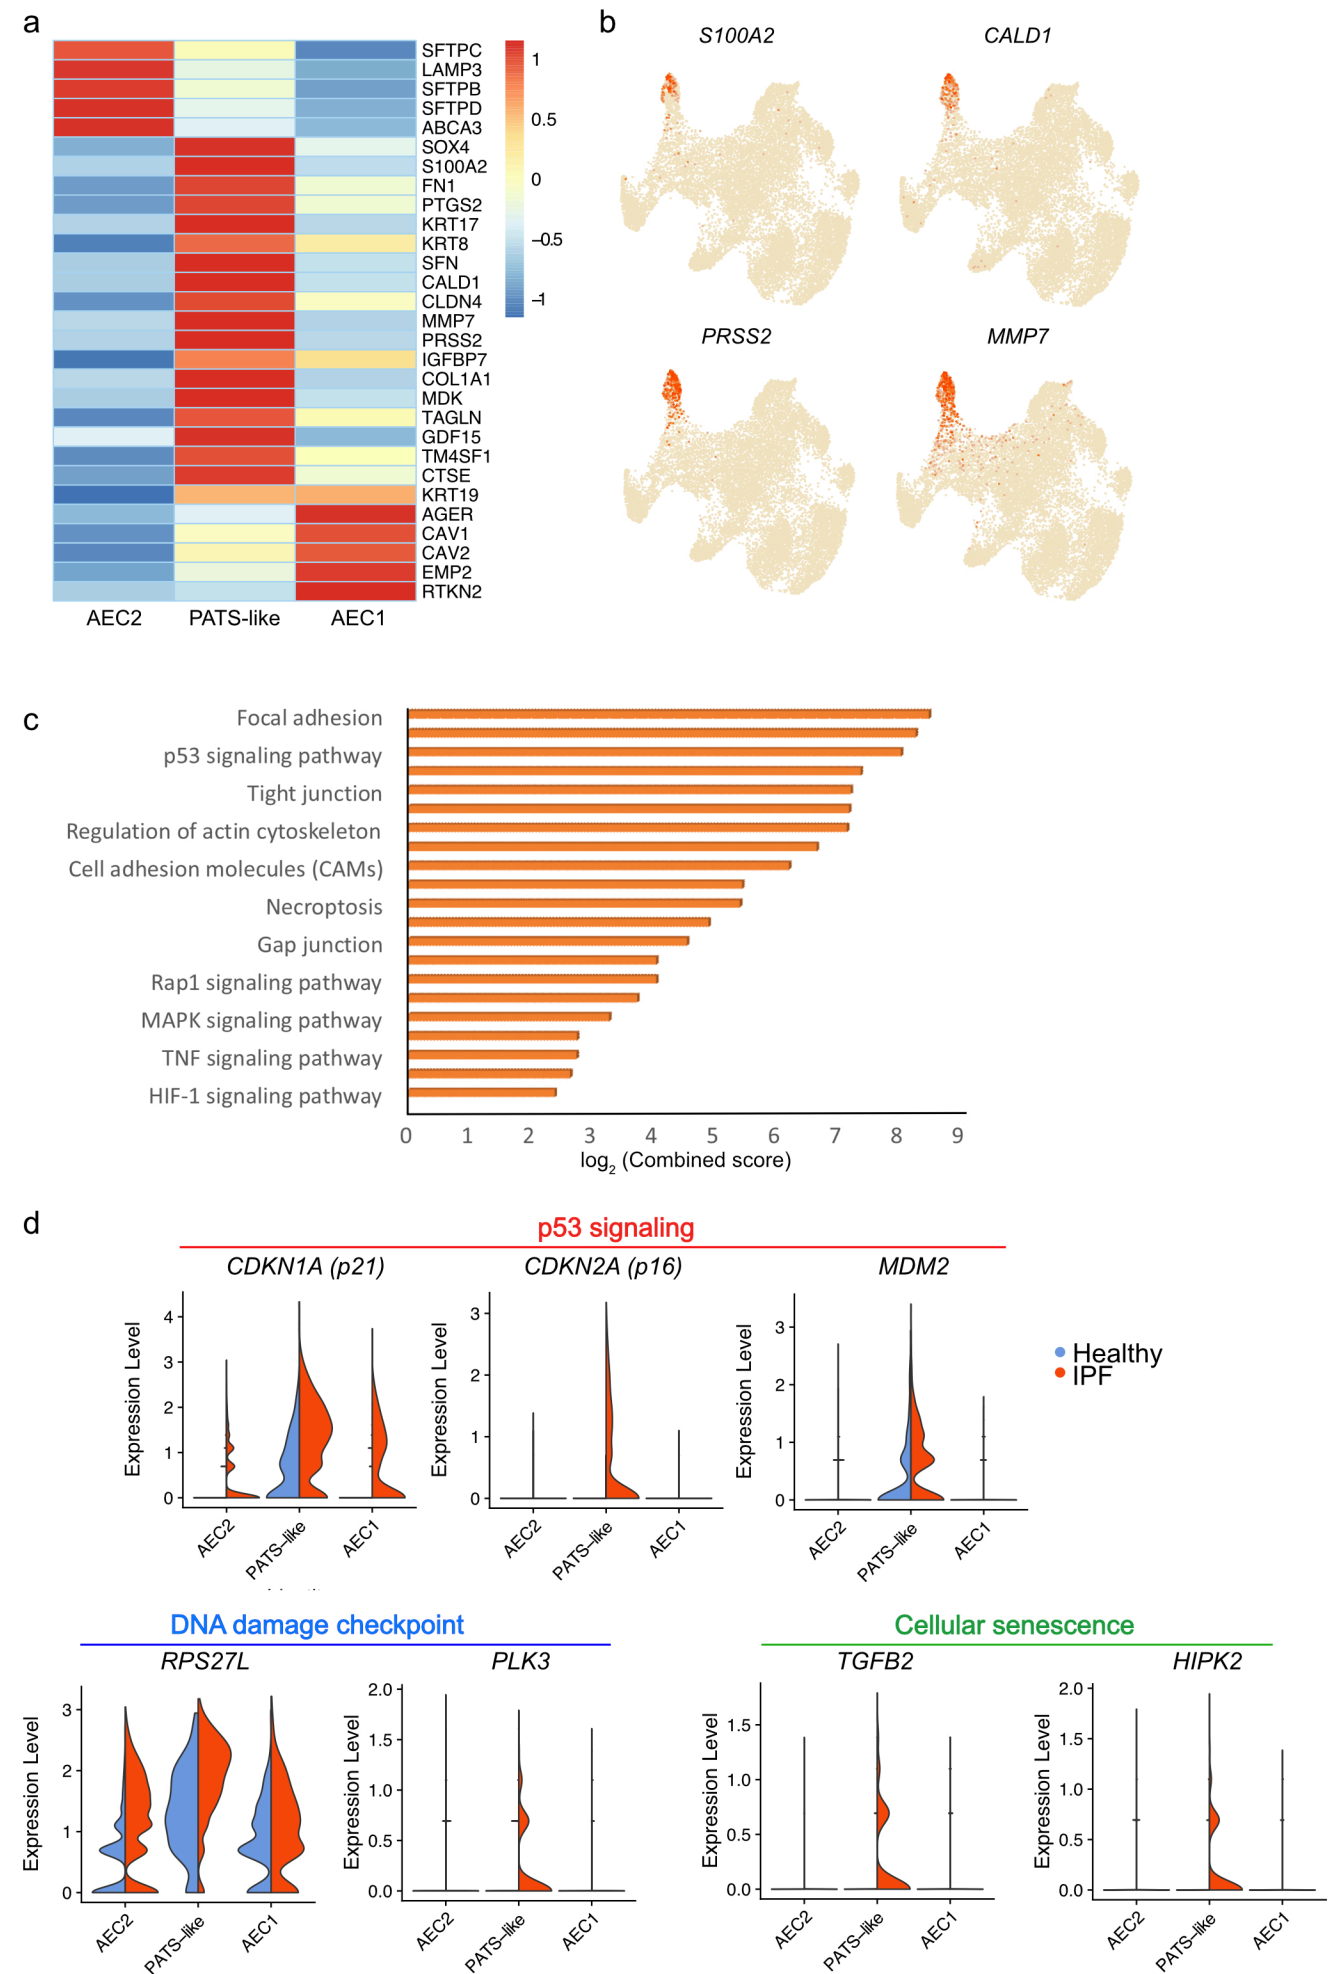

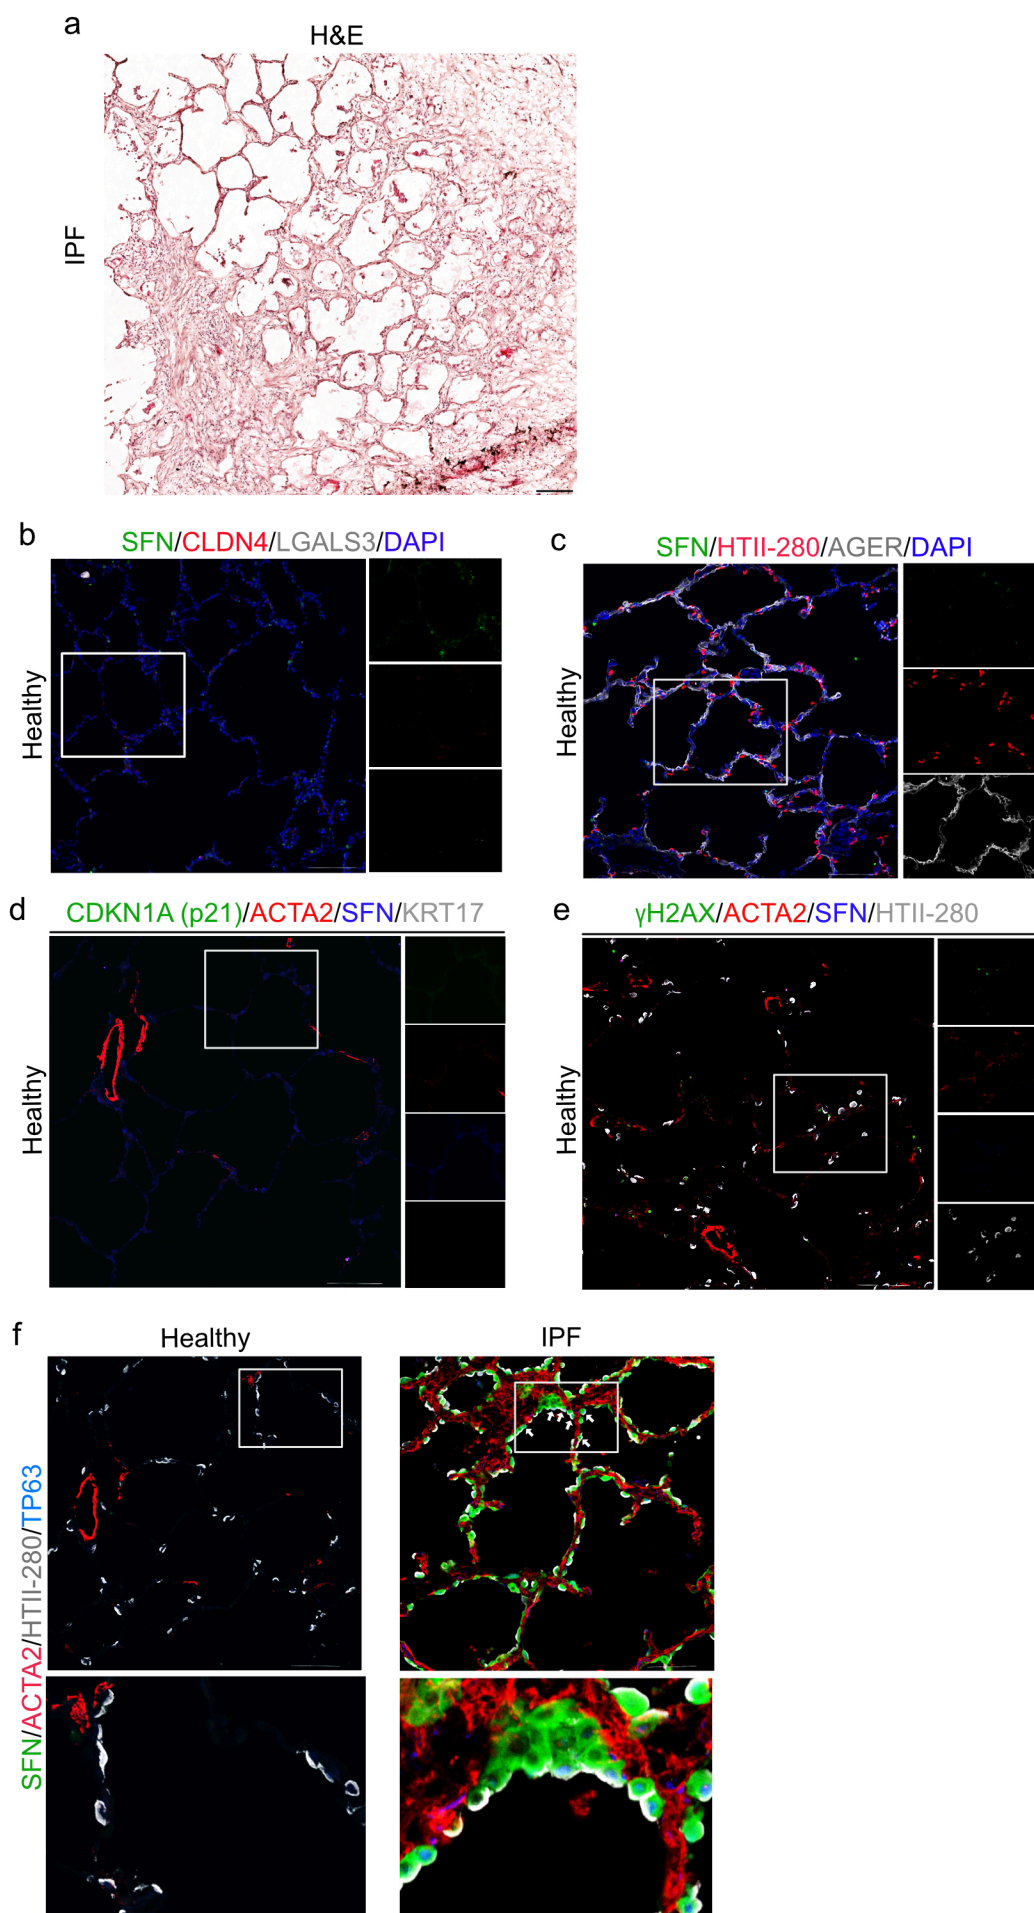

Source: https://www.biorxiv.org/content/10.1101/855155v1.full.pdf
